# Supplementary material for: Trifluoromethylation of (hetero)aryl iodides and bromides with copper(i) chlorodifluoroacetate complexes
Source: Royal Society of Chemistry journal article supplement (doi:10.1039/c6ra15547b), 2016-01-01

# Supporting Information *for*

## Trifluoromethylation of (Hetero)Aryl Iodides and Bromides with Copper (I) Chlorodifluoroacetate Complexes

Xiaoxi Lin,<sup>†</sup> Zhengyu Li,<sup>†</sup> Xiaoyan Han,<sup>\*,‡</sup> and Zhiqiang Weng<sup>\*,†,§</sup>

<sup>†</sup>State Key Laboratory of Photocatalysis on Energy and Environment, College of Chemistry, Fuzhou University, Fujian 350108, China. <sup>‡</sup>Testing and Analysis Center, Soochow University, Suzhou 215123, China. <sup>§</sup>State Key Laboratory of Structural Chemistry, Fujian Institute of Research on the Structure of Matter, Chinese Academy of Sciences, Fuzhou, Fujian 350002, PR China.

Corresponding authors: [hanxiaoyan@suda.edu.cn](mailto:hanxiaoyan@suda.edu.cn) (X. H); [zweng@fzu.edu.cn](mailto:zweng@fzu.edu.cn) (Z. W)

### Table of Contents

|                                                                     |    |
|---------------------------------------------------------------------|----|
| Data for Compounds <b>3a-3r</b> , <b>5a-5o</b> , and <b>7</b> ..... | 2  |
| Generation of L <sub>n</sub> CuCF <sub>3</sub> species.....         | 16 |
| Copies of NMR spectra.....                                          | 19 |

### Data for Compounds **3a-3r**, **5a-5o**, and **7**.

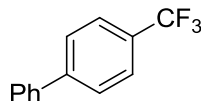

#### **4-Trifluoromethyl-1,1'-biphenyl (3a)**<sup>[1]</sup>

Quantitative  $^{19}\text{F}$  NMR analysis of the reaction mixture indicated that **3a** was produced in 73% yield.  $^1\text{H}$  NMR (400 MHz,  $\text{CDCl}_3$ )  $\delta$  7.75 – 7.67 (m, 4H), 7.66 – 7.60 (m, 2H), 7.54 – 7.44 (m, 2H), 7.46 – 7.30 (m, 1H).  $^{19}\text{F}$  NMR (376 MHz,  $\text{CDCl}_3$ )  $\delta$  -62.4 (s, 3F).  $^{13}\text{C}$  NMR (101 MHz,  $\text{CDCl}_3$ )  $\delta$  144.7 (q,  $J$  = 1.1 Hz), 139.8 (s), 129.3 (q,  $J$  = 32.6 Hz), 129.0 (s), 128.2 (s), 127.4 (s), 127.3 (s), 125.7 (q,  $J$  = 3.8 Hz), 124.3 (q,  $J$  = 271.8 Hz). GC-MS  $m/z$  221 ( $\text{M}^+ - \text{H}$ ).

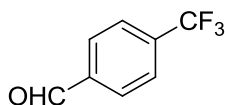

#### **4-(Trifluoromethyl)benzaldehyde (3b)**<sup>[2]</sup>

Quantitative  $^{19}\text{F}$  NMR analysis of the reaction mixture indicated that **3b** was produced in 86% yield.  $^1\text{H}$  NMR (400 MHz,  $\text{CDCl}_3$ )  $\delta$  10.13 (s, 1H), 8.04 (d,  $J$  = 8.4 Hz, 2H), 7.84 (d,  $J$  = 8.4 Hz, 2H).  $^{19}\text{F}$  NMR (376 MHz,  $\text{CDCl}_3$ )  $\delta$  -63.2 (s, 3F).  $^{13}\text{C}$  NMR (101 MHz,  $\text{CDCl}_3$ )  $\delta$  191.1 (s), 138.7 (s), 135.6 (q,  $J$  = 32.9 Hz), 129.9 (s), 126.1 (q,  $J$  = 3.7 Hz), 123.4 (q,  $J$  = 273.9 Hz). GC-MS  $m/z$  173 ( $\text{M}^+ - \text{H}$ ).

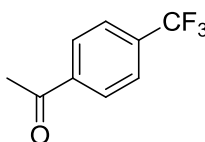

#### **1-(4-Trifluoromethyl)phenyl)ethanone (3c)**<sup>[1]</sup>

Quantitative  $^{19}\text{F}$  NMR analysis of the reaction mixture indicated that **3c** was produced in 96% yield.  $^1\text{H}$  NMR (400 MHz,  $\text{CDCl}_3$ )  $\delta$  8.08 (d,  $J$  = 8.2 Hz, 2H), 7.76 (d,  $J$  = 8.2

Hz, 2H), 2.67 (s, 3H).  $^{19}\text{F}$  NMR (376 MHz,  $\text{CDCl}_3$ )  $\delta$  -63.1 (s, 3F).  $^{13}\text{C}$  NMR (101 MHz,  $\text{CDCl}_3$ )  $\delta$  197.0 (s), 139.7 (q,  $J$  = 1.3 Hz), 134.4 (q,  $J$  = 32.8 Hz), 128.6 (s), 125.7 (q,  $J$  = 3.8 Hz), 123.6 (q,  $J$  = 273.7 Hz), 26.8 (s). GC-MS  $m/z$  188 ( $\text{M}^+$ ).

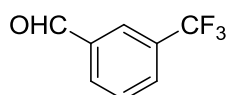

### 3-(Trifluoromethyl)benzaldehyde (**3d**)<sup>[3]</sup>

Quantitative  $^{19}\text{F}$  NMR analysis of the reaction mixture indicated that **3d** was produced in 96% yield.  $^1\text{H}$  NMR (400 MHz,  $\text{CDCl}_3$ )  $\delta$  10.09 (s, 1H), 8.16 (s, 1H), 8.09 (d,  $J$  = 7.6 Hz, 1H), 7.90 (d,  $J$  = 7.8 Hz, 1H), 7.70 (t,  $J$  = 7.7 Hz, 1H).  $^{19}\text{F}$  NMR (376 MHz,  $\text{CDCl}_3$ )  $\delta$  -63.0 (s, 3F).  $^{13}\text{C}$  NMR (101 MHz,  $\text{CDCl}_3$ )  $\delta$  190.7 (s), 136.8 (s), 132.6 (q,  $J$  = 1.2 Hz), 131.8 (q,  $J$  = 33.6 Hz), 130.8 (q,  $J$  = 3.6 Hz), 129.8 (s), 126.4 (q,  $J$  = 3.7 Hz), 123.5 (q,  $J$  = 273.5 Hz). GC-MS  $m/z$  173 ( $\text{M}^+ - \text{H}$ ).

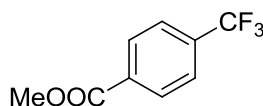

### Methyl 4-(trifluoromethyl)benzoate (**3e**)<sup>[1]</sup>

Quantitative  $^{19}\text{F}$  NMR analysis of the reaction mixture indicated that **3e** was produced in 99% yield.  $^1\text{H}$  NMR (400 MHz,  $\text{CDCl}_3$ )  $\delta$  8.15 (d,  $J$  = 7.7 Hz, 2H), 7.71 (d,  $J$  = 7.7 Hz, 2H), 3.96 (s, 3H).  $^{19}\text{F}$  NMR (376 MHz,  $\text{CDCl}_3$ )  $\delta$  -63.2 (s, 3F).  $^{13}\text{C}$  NMR (101 MHz,  $\text{CDCl}_3$ )  $\delta$  165.9 (s), 134.4 (q,  $J$  = 32.6 Hz), 133.3 (s), 130.0 (s), 125.4 (q,  $J$  = 3.7 Hz), 123.6 (q,  $J$  = 273.7 Hz), 52.5 (s). GC-MS  $m/z$  203 ( $\text{M}^+ - \text{H}$ ).

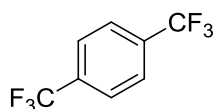

### 1,4-Bis(trifluoromethyl)benzene (**3f**)<sup>[4]</sup>

Quantitative  $^{19}\text{F}$  NMR analysis of the reaction mixture indicated that **3f** was produced in 98% yield.  $^1\text{H}$  NMR (400 MHz,  $\text{CDCl}_3$ )  $\delta$  7.80 (s, 4H).  $^{19}\text{F}$  NMR (376 MHz,  $\text{CDCl}_3$ )  $\delta$  -63.3 (s, 6F).  $^{13}\text{C}$  NMR (101 MHz,  $\text{CDCl}_3$ )  $\delta$  134.0 (q,  $J = 33.3$  Hz), 126.0 – 125.7 (m), 123.4 (q,  $J = 273.7$  Hz). GC-MS  $m/z$  214 ( $\text{M}^+$ ).

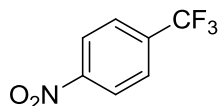

**1-Nitro-4-(trifluoromethyl)benzene (3g)<sup>[2]</sup>**

Quantitative  $^{19}\text{F}$  NMR analysis of the reaction mixture indicated that **3g** was produced in 89% yield.  $^1\text{H}$  NMR (400 MHz,  $\text{CDCl}_3$ )  $\delta$  8.38 (d,  $J = 8.7$  Hz, 2H), 7.87 (d,  $J = 8.7$  Hz, 2H).  $^{19}\text{F}$  NMR (376 MHz,  $\text{CDCl}_3$ )  $\delta$  -63.2 (s, 3F).  $^{13}\text{C}$  NMR (101 MHz,  $\text{CDCl}_3$ )  $\delta$  150.0 (s), 136.1 (q,  $J = 33.3$  Hz), 126.9 – 126.6 (m), 124.1 (s), 123.0 (q,  $J = 274.1$  Hz). GC-MS  $m/z$  191 ( $\text{M}^+$ ).

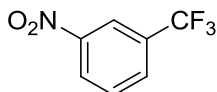

**1-Nitro-3-(trifluoromethyl)benzene (3h)<sup>[1]</sup>**

Quantitative  $^{19}\text{F}$  NMR analysis of the reaction mixture indicated that **3h** was produced in 82% yield.  $^1\text{H}$  NMR (400 MHz,  $\text{CDCl}_3$ )  $\delta$  8.51 (s, 1H), 8.46 (d,  $J = 8.3$  Hz, 1H), 8.00 (d,  $J = 7.7$  Hz, 1H), 7.77 (t,  $J = 8.0$  Hz, 1H).  $^{19}\text{F}$  NMR (376 MHz,  $\text{CDCl}_3$ )  $\delta$  -62.9 (s, 3F).  $^{13}\text{C}$  NMR (101 MHz,  $\text{CDCl}_3$ )  $\delta$  148.3 (s), 132.3 (q,  $J = 33.8$  Hz), 131.1 (q,  $J = 3.5$  Hz), 130.4 (s), 126.7 (s), 122.8 (q,  $J = 273.8$  Hz), 120.8 (q,  $J = 3.9$  Hz). GC-MS  $m/z$  191 ( $\text{M}^+$ ).

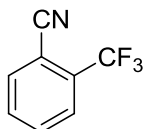

**2-(Trifluoromethyl)benzonitrile (3i)<sup>[1]</sup>**

Quantitative  $^{19}\text{F}$  NMR analysis of the reaction mixture indicated that **3i** was produced in 81% yield.  $^1\text{H}$  NMR (400 MHz,  $\text{CDCl}_3$ )  $\delta$  7.91 – 7.83 (m, 2H), 7.78 (t,  $J$  = 7.6 Hz, 1H), 7.75 – 7.69 (m, 1H).  $^{19}\text{F}$  NMR (376 MHz,  $\text{CDCl}_3$ )  $\delta$  -62.0 (s, 3F).  $^{13}\text{C}$  NMR (101 MHz,  $\text{CDCl}_3$ )  $\delta$  134.7 (s), 132.9 (q,  $J$  = 32.9 Hz), 132.9 (s), 132.2 (q,  $J$  = 1.0 Hz), 126.7 (q,  $J$  = 4.7 Hz), 122.4 (q,  $J$  = 274.9 Hz), 115.4 (s), 110.3 (q,  $J$  = 2.2 Hz). GC-MS  $m/z$  171 ( $\text{M}^+$ ).

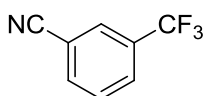

### 3-(Trifluoromethyl)benzonitrile (**3j**)<sup>[5]</sup>

Quantitative  $^{19}\text{F}$  NMR analysis of the reaction mixture indicated that **3j** was produced in 82% yield.  $^1\text{H}$  NMR (400 MHz,  $\text{CDCl}_3$ )  $\delta$  7.94 (s, 1H), 7.92 – 7.87 (bs, 2H), 7.68 (t,  $J$  = 7.8 Hz, 1H).  $^{19}\text{F}$  NMR (376 MHz,  $\text{CDCl}_3$ )  $\delta$  -63.2 (s, 3F).  $^{13}\text{C}$  NMR (101 MHz,  $\text{CDCl}_3$ )  $\delta$  135.3 (s), 132.0 (q,  $J$  = 33.7 Hz), 130.0 (s), 129.5 (q,  $J$  = 3.6 Hz), 129.0 (q,  $J$  = 3.9 Hz), 122.9 (t,  $J$  = 272.7 Hz), 117.3 (s), 113.5 (s). GC-MS  $m/z$  171 ( $\text{M}^+$ ).

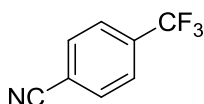

### 4-(Trifluoromethyl)benzonitrile (**3k**)<sup>[2]</sup>

Quantitative  $^{19}\text{F}$  NMR analysis of the reaction mixture indicated that **3k** was produced in 96% yield.  $^1\text{H}$  NMR (400 MHz,  $\text{CDCl}_3$ )  $\delta$  7.84 (d,  $J$  = 8.6 Hz, 2H), 7.79 (d,  $J$  = 8.6 Hz, 2H).  $^{19}\text{F}$  NMR (376 MHz,  $\text{CDCl}_3$ )  $\delta$  -63.5 (s, 3F).  $^{13}\text{C}$  NMR (101 MHz,  $\text{CDCl}_3$ )  $\delta$  134.6 (d,  $J$  = 33.6 Hz), 132.7 (s), 126.2 (t,  $J$  = 3.7 Hz), 123.1 (d,  $J$  = 274.0 Hz), 117.4 (s), 116.1 (q,  $J$  = 1.4 Hz). GC-MS  $m/z$  171 ( $\text{M}^+$ ).

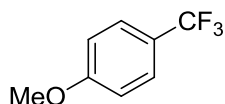

### 1-Methoxy-4-(trifluoromethyl)benzene (**3l**)<sup>[2]</sup>

Quantitative  $^{19}\text{F}$  NMR analysis of the reaction mixture indicated that **3l** was produced in 70% yield.  $^1\text{H}$  NMR (400 MHz,  $\text{CDCl}_3$ )  $\delta$  7.58 (d,  $J = 8.6$  Hz, 2H), 6.99 (d,  $J = 8.6$  Hz, 2H), 3.88 (s, 3H).  $^{19}\text{F}$  NMR (376 MHz,  $\text{CDCl}_3$ )  $\delta$  -61.4 (s, 3F).  $^{13}\text{C}$  NMR (101 MHz,  $\text{CDCl}_3$ )  $\delta$  162.0 (s), 126.9 (q,  $J = 3.7$  Hz), 124.5 (q,  $J = 270.9$  Hz), 122.8 (q,  $J = 32.5$  Hz), 113.9 (s), 55.4 (s). GC-MS  $m/z$  176 ( $\text{M}^+$ ).

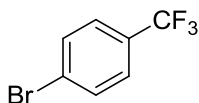

### 1-Bromo-4-(trifluoromethyl)benzene (**3m**)<sup>[2]</sup>

Quantitative  $^{19}\text{F}$  NMR analysis of the reaction mixture indicated that **3m** was produced in 83% yield.  $^1\text{H}$  NMR (400 MHz,  $\text{CDCl}_3$ )  $\delta$  7.64 (d,  $J = 8.6$  Hz, 2H), 7.50 (d,  $J = 8.6$  Hz, 2H).  $^{19}\text{F}$  NMR (376 MHz,  $\text{CDCl}_3$ )  $\delta$  -62.8 (s, 3F).  $^{13}\text{C}$  NMR (101 MHz,  $\text{CDCl}_3$ )  $\delta$  132.1 (s), 129.7 (s), 126.9 (q,  $J = 3.8$  Hz), 126.5 (q,  $J = 1.8$  Hz), 123.9 (q,  $J = 273.1$  Hz). GC-MS  $m/z$  225 ( $\text{M}^+$ ).

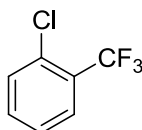

### 1-Chloro-2-(trifluoromethyl)benzene (**3n**)<sup>[6]</sup>

Quantitative  $^{19}\text{F}$  NMR analysis of the reaction mixture indicated that **3n** was produced in 76% yield.  $^1\text{H}$  NMR (400 MHz,  $\text{CDCl}_3$ )  $\delta$  7.69 (d,  $J = 8.0$  Hz, 1H), 7.57 – 7.47 (m, 2H), 7.38 – 7.32 (m, 1H).  $^{19}\text{F}$  NMR (376 MHz,  $\text{CDCl}_3$ )  $\delta$  -62.7 (s, 3F).  $^{13}\text{C}$  NMR (101 MHz,  $\text{CDCl}_3$ )  $\delta$  132.9 (q,  $J = 1.0$  Hz), 132.4 (q,  $J = 1.9$  Hz), 131.4 (s), 128.5 (q,  $J = 31.5$  Hz), 127.5 (q,  $J = 5.5$  Hz), 126.6 (s), 122.9 (d,  $J = 274.1$  Hz). GC-MS  $m/z$  180 ( $\text{M}^+$ ).

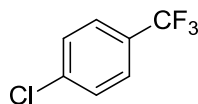

**1-Chloro-4-(trifluoromethyl)benzene (3o)<sup>[7]</sup>**

Quantitative <sup>19</sup>F NMR analysis of the reaction mixture indicated that **3o** was produced in 77% yield. <sup>1</sup>H NMR (400 MHz, CDCl<sub>3</sub>) δ 7.57 (d, *J* = 8.2 Hz, 2H), 7.47 (d, *J* = 8.2 Hz, 2H). <sup>19</sup>F NMR (376 MHz, CDCl<sub>3</sub>) δ -62.6 (s, 3F). <sup>13</sup>C NMR (101 MHz, CDCl<sub>3</sub>) δ 138.1 (q, *J* = 1.7 Hz), 129.1 (s), 129.0 (q, *J* = 32.8 Hz), 126.7 (q, *J* = 3.8 Hz), 123.8 (d, *J* = 270.3 Hz). GC-MS *m/z* 180 (M<sup>+</sup>).

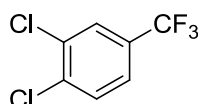

**1,2-Dichloro-4-(trifluoromethyl)benzene (3p)<sup>[8]</sup>**

Quantitative <sup>19</sup>F NMR analysis of the reaction mixture indicated that **3p** was produced in 89% yield. <sup>1</sup>H NMR (400 MHz, CDCl<sub>3</sub>) δ 7.75 (s, 1H), 7.59 (d, *J* = 8.6 Hz, 1H), 7.50 (d, *J* = 8.1 Hz, 1H). <sup>19</sup>F NMR (376 MHz, CDCl<sub>3</sub>) δ -62.8 (s, 3F). <sup>13</sup>C NMR (101 MHz, CDCl<sub>3</sub>) δ 136.6 (q, *J* = 1.1 Hz), 133.5 (s), 131.0 (s), 130.4 (q, *J* = 33.6 Hz), 127.6 (q, *J* = 3.9 Hz), 124.5 (q, *J* = 3.6 Hz), 123.0 (q, *J* = 273.9 Hz). GC-MS *m/z* 214 (M<sup>+</sup>-H).

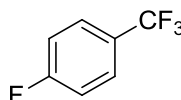

**1-Fluoro-4-(trifluoromethyl)benzene (3q)<sup>[9]</sup>**

Quantitative <sup>19</sup>F NMR analysis of the reaction mixture indicated that **3q** was produced in 60% yield. <sup>1</sup>H NMR (400 MHz, CDCl<sub>3</sub>) δ 7.62 (dd, *J* = 8.3, 5.2 Hz, 2H), 7.16 (m, 2H). <sup>19</sup>F NMR (376 MHz, CDCl<sub>3</sub>) δ -62.1 (s, 3F), -107.6 – -107.9 (m, 1F). <sup>13</sup>C NMR (101 MHz, CDCl<sub>3</sub>) δ 164.6 (d, *J* = 248.4), 127.6 (m), 126.8 (qd, *J* = 33.0, 3.4 Hz), 123.8 (q, *J* = 272.7 Hz), 115.9 (d, *J* = 22.4 Hz). GC-MS *m/z* 163 (M<sup>+</sup>-H).

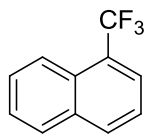

**1-(Trifluoromethyl)naphthalene (3r)** <sup>[1]</sup>

Quantitative  $^{19}\text{F}$  NMR analysis of the reaction mixture indicated that **3r** was produced in 64% yield.  $^1\text{H}$  NMR (400 MHz,  $\text{CDCl}_3$ )  $\delta$  8.23 (d,  $J = 8.7$  Hz, 1H), 8.06 (d,  $J = 8.4$  Hz, 1H), 7.96 (d,  $J = 8.2$  Hz, 1H), 7.90 (d,  $J = 7.4$  Hz, 1H), 7.64 – 7.53 (m, 2H), 7.54 (t,  $J = 7.8$  Hz, 1H).  $^{19}\text{F}$  NMR (376 MHz,  $\text{CDCl}_3$ )  $\delta$  -59.7 (s, 3F).  $^{13}\text{C}$  NMR (101 MHz,  $\text{CDCl}_3$ )  $\delta$  134.0 (s), 132.8 (s), 129.0 (s), 128.8 (s), 127.7 (s), 126.6 (s), 126.1 (q,  $J = 30.1$  Hz), 124.8 (q,  $J = 274.5$  Hz), 124.7 (q,  $J = 6.0$  Hz), 124.3 (q,  $J = 2.4$  Hz), 124.2 (s). GC-MS  $m/z$  196 ( $\text{M}^+$ ).

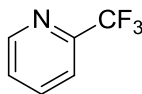

**2-(Trifluoromethyl)pyridine (5a)** <sup>[10]</sup>

Quantitative  $^{19}\text{F}$  NMR analysis of the reaction mixture indicated that **5a** was produced in 97% yield.  $^1\text{H}$  NMR (400 MHz,  $\text{CDCl}_3$ )  $\delta$  8.75 (d,  $J = 4.4$  Hz, 1H), 7.89 (t,  $J = 7.6$  Hz, 1H), 7.70 (d,  $J = 8.0$  Hz, 1H), 7.54 – 7.48 (m, 1H).  $^{19}\text{F}$  NMR (376 MHz,  $\text{CDCl}_3$ )  $\delta$  -68.1 (s, 3F).  $^{13}\text{C}$  NMR (101 MHz,  $\text{CDCl}_3$ )  $\delta$  150.0 (s), 148.2 (s), 137.4 (s), 126.4 (q,  $J = 1.0$  Hz), 121.5 (q,  $J = 275.0$  Hz), 120.4 (q,  $J = 2.7$  Hz). GC-MS  $m/z$  147 ( $\text{M}^+$ ).

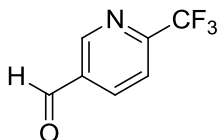

**6-(Trifluoromethyl)nicotinaldehyde (5b)** <sup>[11]</sup>

Quantitative  $^{19}\text{F}$  NMR analysis of the reaction mixture indicated that **5b** was

produced in 73% yield.  $^1\text{H}$  NMR (400 MHz,  $\text{CDCl}_3$ )  $\delta$  10.24 (s, 1H), 9.22 (s, 1H), 8.39 (dd,  $J = 8.1, 1.9$  Hz, 1H), 7.91 (d,  $J = 8.1$  Hz, 1H).  $^{19}\text{F}$  NMR (376 MHz,  $\text{CDCl}_3$ )  $\delta$  -68.3 (s, 3F).  $^{13}\text{C}$  NMR (101 MHz,  $\text{CDCl}_3$ )  $\delta$  189.3 (s), 152.3 (q,  $J = 35.4$  Hz), 151.7 (s), 137.7 (s), 133.1 (q,  $J = 0.9$  Hz), 121.0 (q,  $J = 2.7$  Hz), 120.9 (q,  $J = 275.8$  Hz). HRMS (EI) calcd for  $\text{C}_7\text{H}_4\text{F}_3\text{NO}$  : 175.0245; Found: 175.0246.

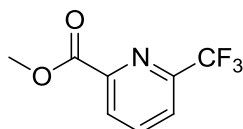

**Methyl 6-(trifluoromethyl)picolinate (5c)<sup>[12]</sup>**

Quantitative  $^{19}\text{F}$  NMR analysis of the reaction mixture indicated that **5c** was produced in 76% yield.  $^1\text{H}$  NMR (400 MHz,  $\text{CDCl}_3$ )  $\delta$  8.24 (d,  $J = 7.8$  Hz, 1H), 7.98 (t,  $J = 8.0$  Hz, 1H), 7.79 (d,  $J = 8.0$  Hz, 1H), 3.91 (s, 3H).  $^{19}\text{F}$  NMR (376 MHz,  $\text{CDCl}_3$ )  $\delta$  -67.7 (s, 3F).  $^{13}\text{C}$  NMR (101 MHz,  $\text{CDCl}_3$ )  $\delta$  164.7 (s), 148.6 (s), 148.5 (q,  $J = 35.5$  Hz), 138.8 (s), 127.6 (q,  $J = 1.0$  Hz), 123.5 (q,  $J = 2.6$  Hz), 121.0 (q,  $J = 274.8$  Hz), 53.3 (s). GC-MS  $m/z$  205 ( $\text{M}^+$ ).

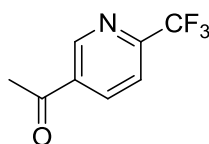

**1-(6-(Trifluoromethyl)pyridin-3-yl)ethanone (5d)<sup>[13]</sup>**

Quantitative  $^{19}\text{F}$  NMR analysis of the reaction mixture indicated that **5d** was produced in 72% yield.  $^1\text{H}$  NMR (400 MHz, )  $\delta$  9.27 (s, 1H), 8.43 (d,  $J = 8.2$  Hz, 1H), 7.84 (d,  $J = 8.2$  Hz, 1H), 2.72 (s, 3H).  $^{19}\text{F}$  NMR (376 MHz,  $\text{CDCl}_3$ )  $\delta$  -68.3 (s, 3F).  $^{13}\text{C}$  NMR (101 MHz,  $\text{CDCl}_3$ )  $\delta$  195.4 (s), 151.3 (q,  $J = 35.3$  Hz), 149.9 (s), 137.2 (s), 134.2 (q,  $J = 0.9$  Hz), 121.1 (q,  $J = 275.6$  Hz), 120.5 (q,  $J = 2.7$  Hz), 27.0 (s). GC-MS  $m/z$  189 ( $\text{M}^+$ ).

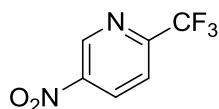

**5-Nitro-2-(trifluoromethyl)pyridine (5e)**<sup>[12]</sup>

Quantitative <sup>19</sup>F NMR analysis of the reaction mixture indicated that **5e** was produced in 62% yield. <sup>1</sup>H NMR (400 MHz, CDCl<sub>3</sub>) δ 9.52 (d, *J* = 2.3 Hz, 1H), 8.72 (dd, *J* = 8.6, 2.4 Hz, 1H), 7.97 (d, *J* = 8.6 Hz, 1H). <sup>19</sup>F NMR (376 MHz, CDCl<sub>3</sub>) δ -68.1 (s, 3F). <sup>13</sup>C NMR (101 MHz, CDCl<sub>3</sub>) δ 152.6 (q, *J* = 36.0 Hz), 145.5 (s), 145.4 (s), 133.0 (s), 121.2 (q, *J* = 2.6 Hz), 120.5 (q, *J* = 276.0 Hz). GC-MS *m/z* 192 (M<sup>+</sup>).

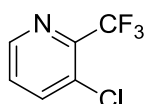

**3-Chloro-2-(trifluoromethyl)pyridine (5f)**<sup>[14]</sup>

Quantitative <sup>19</sup>F NMR analysis of the reaction mixture indicated that **5f** was produced in 83% yield. <sup>1</sup>H NMR (400 MHz, CDCl<sub>3</sub>) δ 8.62 (d, *J* = 3.7 Hz, 1H), 7.91 (d, *J* = 12.7 Hz, 1H), 7.49 (dd, *J* = 8.2, 4.6 Hz, 1H). <sup>19</sup>F NMR (376 MHz, CDCl<sub>3</sub>) δ -66.3 (s, 3F). <sup>13</sup>C NMR (101 MHz, CDCl<sub>3</sub>) δ 146.7 (s), 144.8 (q, *J* = 34.3 Hz), 139.6 (s), 130.6 (s), 127.3 (s), 121.0 (q, *J* = 276.2 Hz). GC-MS *m/z* 181 (M<sup>+</sup>-H).

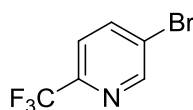

**5-Bromo-2-(trifluoromethyl)pyridine (5g)**<sup>[15]</sup>

Quantitative <sup>19</sup>F NMR analysis of the reaction mixture indicated that **5g** was produced in 97% yield. <sup>1</sup>H NMR (400 MHz, CDCl<sub>3</sub>) δ 8.82 (d, *J* = 1.7 Hz, 1H), 8.05 (dd, *J* = 8.3, 1.7 Hz, 1H), 7.61 (d, *J* = 8.3 Hz, 1H). <sup>19</sup>F NMR (376 MHz, CDCl<sub>3</sub>) δ -67.9 (s, 3F). <sup>13</sup>C NMR (101 MHz, CDCl<sub>3</sub>) δ 151.4 (s), 146.7 (q, *J* = 35.7 Hz), 140.1 (s), 124.0 (q, *J* = 1.2 Hz), 121.7 (q, *J* = 2.7 Hz), 121.3 (q, *J* = 275.1 Hz). GC-MS *m/z* 226 (M<sup>+</sup>).

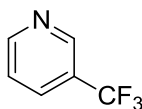

**3-(Trifluoromethyl)pyridine (5h)** <sup>[9]</sup>

Quantitative  $^{19}\text{F}$  NMR analysis of the reaction mixture indicated that **5h** was produced in 77% yield.  $^1\text{H}$  NMR (400 MHz,  $\text{CDCl}_3$ )  $\delta$  8.91 (s, 1H), 8.82 (d,  $J = 4.8$  Hz, 1H), 7.94 (d,  $J = 8.0$  Hz, 1H), 7.50 – 7.40 (m, 1H).  $^{19}\text{F}$  NMR (376 MHz,  $\text{CDCl}_3$ )  $\delta$  -62.7 (s, 3F).  $^{13}\text{C}$  NMR (101 MHz,  $\text{CDCl}_3$ )  $\delta$  153.0 (q,  $J = 1.5$  Hz), 146.7 (q,  $J = 4.1$  Hz), 133.0 (q,  $J = 3.6$  Hz), 126.8 (q,  $J = 33.0$  Hz), 123.4 (q,  $J = 273.4$  Hz), 123.3 (s). GC-MS  $m/z$  147 ( $\text{M}^+$ ).

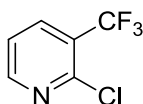

**2-Chloro-3-(trifluoromethyl)pyridine (5i)** <sup>[15]</sup>

Quantitative  $^{19}\text{F}$  NMR analysis of the reaction mixture indicated that **5i** was produced in 78% yield.  $^1\text{H}$  NMR (400 MHz,  $\text{CDCl}_3$ )  $\delta$  8.59 (d,  $J = 4.8$  Hz, 1H), 8.04 (dd,  $J = 7.8, 2.0$  Hz, 1H), 7.45 – 7.35 (m, 1H).  $^{19}\text{F}$  NMR (376 MHz,  $\text{CDCl}_3$ )  $\delta$  -63.8 (s, 3F).  $^{13}\text{C}$  NMR (101 MHz,  $\text{CDCl}_3$ )  $\delta$  152.3 (q,  $J = 1.2$  Hz), 149.1 (q,  $J = 1.6$  Hz), 136.6 (q,  $J = 5.0$  Hz), 125.5 (q,  $J = 33.4$  Hz), 122.1 (q,  $J = 273.8$  Hz), 122.0 (s). GC-MS  $m/z$  182 ( $\text{M}^+ + \text{H}$ ).

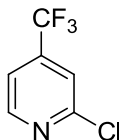

**2-Chloro-4-(trifluoromethyl)pyridine (5j)** <sup>[15]</sup>

Quantitative  $^{19}\text{F}$  NMR analysis of the reaction mixture indicated that **5j** was produced in 96% yield.  $^1\text{H}$  NMR (400 MHz,  $\text{CDCl}_3$ )  $\delta$  8.60 (d,  $J = 5.1$  Hz, 1H), 7.58 (s, 1H), 7.46 (d,  $J = 5.8$  Hz, 1H).  $^{19}\text{F}$  NMR (376 MHz,  $\text{CDCl}_3$ )  $\delta$  -64.8 (s, 3F).  $^{13}\text{C}$  NMR (101

MHz, CDCl<sub>3</sub>)  $\delta$  152.7 (s), 150.9 (s), 141.0 (q,  $J$  = 34.8 Hz), 122.0 (q,  $J$  = 274.7 Hz), 120.6 (q,  $J$  = 3.9 Hz), 118.1 (q,  $J$  = 3.4 Hz). GC-MS  $m/z$  182 ( $M^+$ +H).

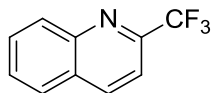

**2-Chloro-4-(trifluoromethyl)pyridine (5k)** <sup>[3]</sup>

Quantitative <sup>19</sup>F NMR analysis of the reaction mixture indicated that **5k** was produced in 81% yield. <sup>1</sup>H NMR (400 MHz, CDCl<sub>3</sub>)  $\delta$  8.39 (d,  $J$  = 8.5 Hz, 1H), 8.27 (d,  $J$  = 8.4 Hz, 1H), 7.94 (d,  $J$  = 8.2 Hz, 1H), 7.86 (ddd,  $J$  = 8.5, 6.9, 1.5 Hz, 1H), 7.79 – 7.75 (d,  $J$  = 8.5 Hz, 1H), 7.71 (ddd,  $J$  = 8.1, 6.9, 1.2 Hz, 1H). <sup>19</sup>F NMR (376 MHz, CDCl<sub>3</sub>)  $\delta$  -67.5 (s, 3F). <sup>13</sup>C NMR (101 MHz, CDCl<sub>3</sub>)  $\delta$  147.9 (q,  $J$  = 34.7 Hz), 147.2 (s), 138.1 (s), 130.8 (s), 130.1 (s), 128.9 (q,  $J$  = 0.8 Hz), 128.6 (s), 127.7 (s), 121.7 (q,  $J$  = 276.1 Hz), 116.8 (d,  $J$  = 2.2 Hz). GC-MS  $m/z$  197 ( $M^+$ ).

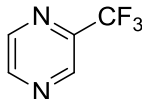

**2-(Trifluoromethyl)pyrazine (5l)** <sup>[10]</sup>

Quantitative <sup>19</sup>F NMR analysis of the reaction mixture indicated that **5l** was produced in 73% yield. <sup>1</sup>H NMR (400 MHz, CDCl<sub>3</sub>)  $\delta$  9.02 (s, 1H), 8.86 (d,  $J$  = 2.4 Hz, 1H), 8.77 – 8.73 (m, 1H). <sup>19</sup>F NMR (376 MHz, CDCl<sub>3</sub>)  $\delta$  -67.8 (s, 3F). <sup>13</sup>C NMR (101 MHz, CDCl<sub>3</sub>)  $\delta$  147.8 (q,  $J$  = 1.3 Hz), 147.7 (q,  $J$  = 1.7 Hz), 144.4 (s), 141.9 (q,  $J$  = 3.2 Hz), 121.0 (q,  $J$  = 275.4 Hz). GC-MS  $m/z$  149 ( $M^+$ +H).

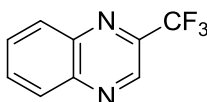

**2-(Trifluoromethyl)quinoxaline (5m)** <sup>[12]</sup>

Quantitative  $^{19}\text{F}$  NMR analysis of the reaction mixture indicated that **5m** was produced in 69% yield.  $^1\text{H}$  NMR (400 MHz,  $\text{CDCl}_3$ )  $\delta$  9.21 (s, 1H), 8.30 – 8.20 (m, 2H), 8.03 – 7.87 (m, 2H).  $^{19}\text{F}$  NMR (376 MHz,  $\text{CDCl}_3$ )  $\delta$  -67.0 (s).  $^{13}\text{C}$  NMR (101 MHz,  $\text{CDCl}_3$ )  $\delta$  143.7 (q,  $J$  = 1.0 Hz), 142.8 (q,  $J$  = 35.4 Hz), 141.0 – 140.7 (m), 132.3 (s), 131.5 (s), 130.0 (s), 129.5 (s), 121.1 (q,  $J$  = 276.5 Hz). GC-MS  $m/z$  198 ( $\text{M}^+$ ).

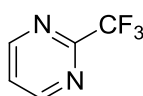

**2-(Trifluoromethyl)pyrimidine (5n)<sup>[16]</sup>**

Quantitative  $^{19}\text{F}$  NMR analysis of the reaction mixture indicated that **5n** was produced in 75% yield.  $^1\text{H}$  NMR (400 MHz,  $\text{CDCl}_3$ )  $\delta$  8.96 (d,  $J$  = 4.9 Hz, 2H), 7.56 (t,  $J$  = 4.7 Hz, 1H).  $^{19}\text{F}$  NMR (376 MHz,  $\text{CDCl}_3$ )  $\delta$  -70.6 (s, 3F).  $^{13}\text{C}$  NMR (101 MHz,  $\text{CDCl}_3$ )  $\delta$  158.0 (s), 157.0 (q,  $J$  = 37.0 Hz), 123.2 (s), 119.4 (q,  $J$  = 276.6 Hz). GC-MS  $m/z$  148 ( $\text{M}^+$ ).

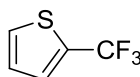

**2-(Trifluoromethyl)thiophene (5o)<sup>[17]</sup>**

Quantitative  $^{19}\text{F}$  NMR analysis of the reaction mixture indicated that **5o** was produced in 51% yield.  $^1\text{H}$  NMR (400 MHz,  $\text{CDCl}_3$ )  $\delta$  7.53 (dd,  $J$  = 5.0, 1.3 Hz, 1H), 7.50 – 7.46 (m, 1H), 7.13 – 7.05 (m, 1H).  $^{19}\text{F}$  NMR (376 MHz,  $\text{CDCl}_3$ )  $\delta$  -54.9 (s, 3F).  $^{13}\text{C}$  NMR (101 MHz,  $\text{CDCl}_3$ )  $\delta$  131.4 (q,  $J$  = 38.3 Hz), 128.9 (q,  $J$  = 1.3 Hz), 128.5 (q,  $J$  = 3.7 Hz), 126.8 (s), 122.6 (d,  $J$  = 269.4 Hz). GC-MS  $m/z$  151 ( $\text{M}^+ - \text{H}$ ).

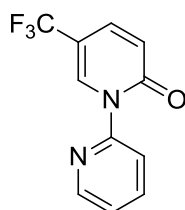

**5-(Trifluoromethyl)-2*H*-[1,2'-bipyridin]-2-one (7)<sup>[18]</sup>**

Quantitative <sup>19</sup>F NMR analysis of the reaction mixture indicated that **7** was produced in 62% yield. <sup>1</sup>H NMR (400 MHz, CDCl<sub>3</sub>) δ 8.62 (d, *J* = 5.6 Hz, 1H), 8.43 – 8.32 (m, 1H), 8.03 – 7.86 (m, 2H), 7.54 (d, *J* = 9.6 Hz, 1H), 7.44 – 7.36 (m, 1H), 6.75 (d, *J* = 8.3 Hz, 1H). <sup>19</sup>F NMR (376 MHz, CDCl<sub>3</sub>) δ -62.8 (s, 3F). <sup>13</sup>C NMR (101 MHz, CDCl<sub>3</sub>) δ 161.4 (s), 150.8 (s), 149.1 (s), 138.1 (s), 136.0 (q, *J* = 5.7 Hz), 135.5 (q, *J* = 2.3 Hz), 123.8 (s), 123.3 (q, *J* = 269.8 Hz), 122.7 (s), 121.1 (s), 110.4 (q, *J* = 35.0 Hz). GC-MS *m/z* 240 (M<sup>+</sup>).

## References:

- [1] J. Zheng, J.-H. Lin, X.-Y. Deng, J.-C. Xiao, *Org. Lett.* **2015**, *17*, 532-535.
- [2] X. Zhang, J. Wang, Z. Wan, *Org. Lett.* **2015**, *17*, 2086-2089.
- [3] A. Lishchynskiy, M. A. Novikov, E. Martin, E. C. Escudero-Adán, P. Novák, V. V. Grushin, *J. Org. Chem.* **2013**, *78*, 11126-11146.
- [4] Y. Ye, M. S. Sanford, *J. Am. Chem. Soc.* **2012**, *134*, 9034-9037.
- [5] P. Anbarasan, H. Neumann, M. Beller, *Angew. Chem. Int. Ed.* **2011**, *50*, 519-522.
- [6] Y. Li, T. Chen, H. Wang, R. Zhang, K. Jin, X. Wang, C. Duan, *Synlett* **2011**, 1713-1716.
- [7] aH. Wu, J. Hynes Jr, *Org. Lett.* **2010**, *12*, 1192-1195; bX. Li, J. Zhao, L. Zhang, M. Hu, L. Wang, J. Hu, *Org. Lett.* **2015**, *17*, 298-301.
- [8] H. Kondo, M. Oishi, K. Fujikawa, H. Amii, *Adv. Synth. Catal.* **2011**, *353*, 1247-1252.
- [9] H. Serizawa, K. Aikawa, K. Mikami, *Chem.-Eur. J.* **2013**, *19*, 17692-17697.
- [10] K. Aikawa, Y. Nakamura, Y. Yokota, W. Toya, K. Mikami, *Chem.-Eur. J.* **2015**, *21*, 96-100.
- [11] G. Bernasconi, S. M. Bromidge, A. J. Carpenter, L. D'Adamo, R. Di Fabio, S. Guery, F. Pavone, A. Pozzan, M. Rinaldi, F. M. Sabbatini, Y. St-Denis, Glaxo Group Limited, UK . WO2008148853A1, **2008**, p. 230pp.
- [12] M. G. Mormino, P. S. Fier, J. F. Hartwig, *Org. Lett.* **2014**, *16*, 1744-1747.
- [13] Z.-L. Wei, J. Kincaid, M. G. Kelly, D. O'Mahony, C. Kaub, Renovis, Inc., USA . WO2008123963A1, **2008**, p. 109pp.
- [14] F. Cottet, M. Marull, F. Mongin, D. Espinosa, M. Schlosser, *Synthesis* **2004**, 1619-1624.
- [15] F. Cottet, M. Schlosser, *Eur. J. Org. Chem.* **2002**, *2002*, 327-330.
- [16] M. M. Kremlev, A. I. Mushta, W. Tyrra, Y. L. Yagupolskii, D. Naumann, A. Mödler, *J. Fluorine Chem.* **2012**, *133*, 67-71.
- [17] T. Knauber, F. Arian, G.-V. Roeschenthaler, L. J. Goossen, *Chem.-Eur. J.* **2011**, *17*, 2689-2697.
- [18] T. Kawasaki-Takasuka, T. Yamazaki, *Tetrahedron* **2015**, *71*, 6824-6831.

**Generation of  $L_nCuCF_3$  species from reaction of **1a** with CsF in the presence of NaOH in DMF at 75 °C.**

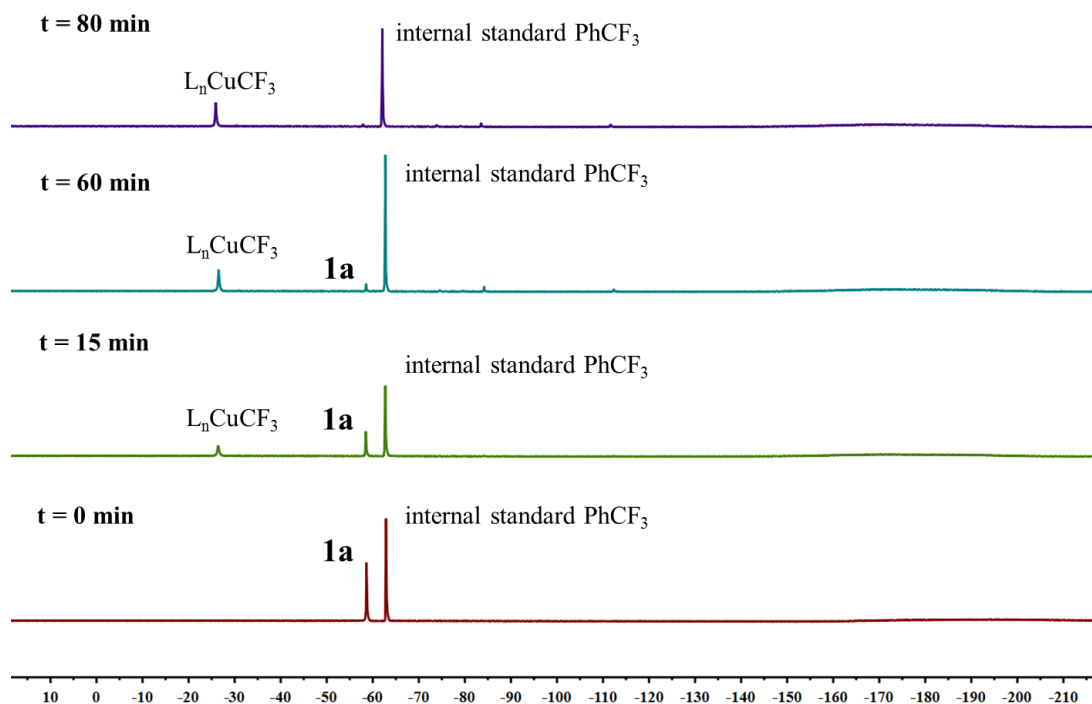

--58.630  
--62.899

**1a** (0.083 mmol) + NaOH (0.1 mmol) + CsF (0.1 mmol) in DMF, 75 °C, 0 min

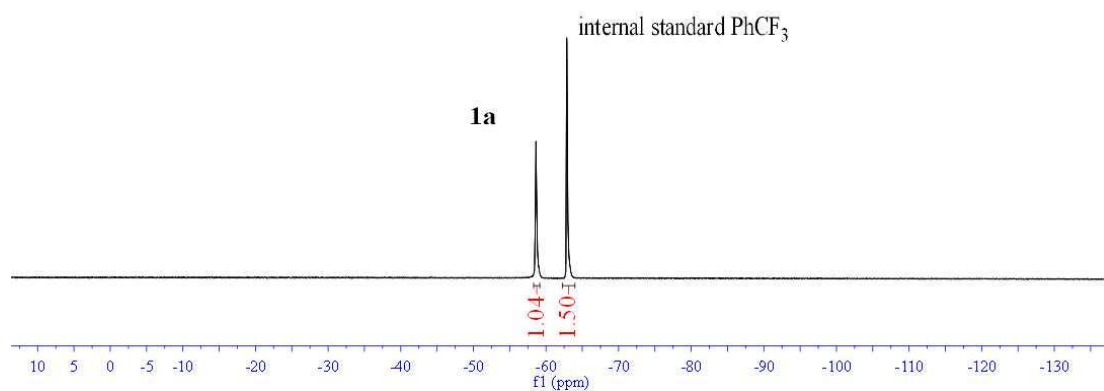

--26.426  
--58.465  
--62.694

**1a** (0.083 mmol) + NaOH (0.1 mmol) + CsF (0.1 mmol) in DMF, 75 °C, 20 min;

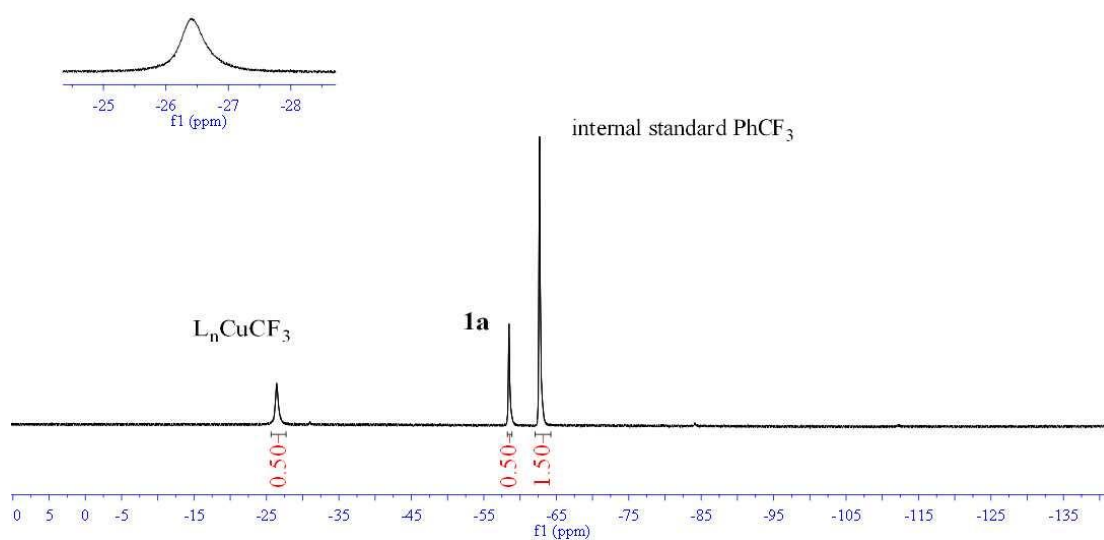

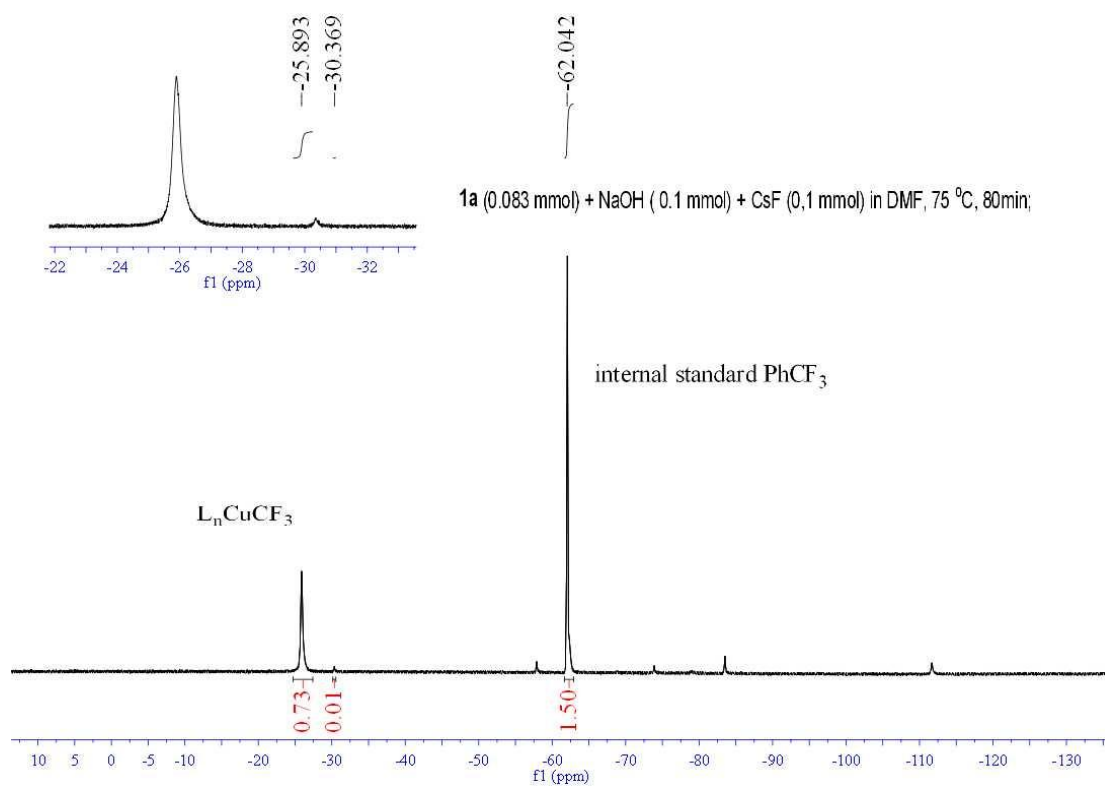

$^1\text{H}$  NMR spectrum of **3a** in  $\text{CDCl}_3$

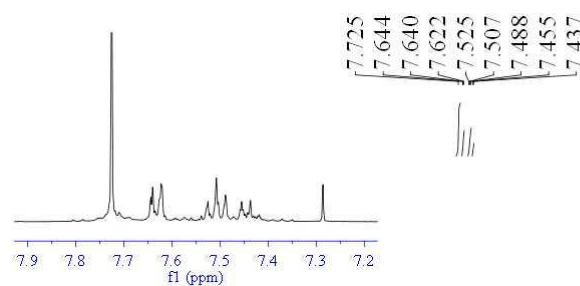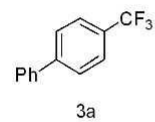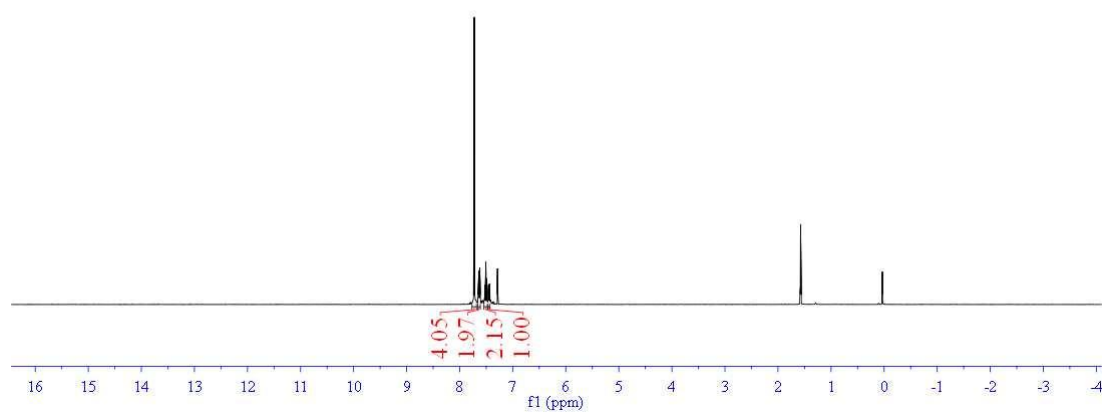

$^{19}\text{F}$  NMR spectrum of **3a** (unlocked)

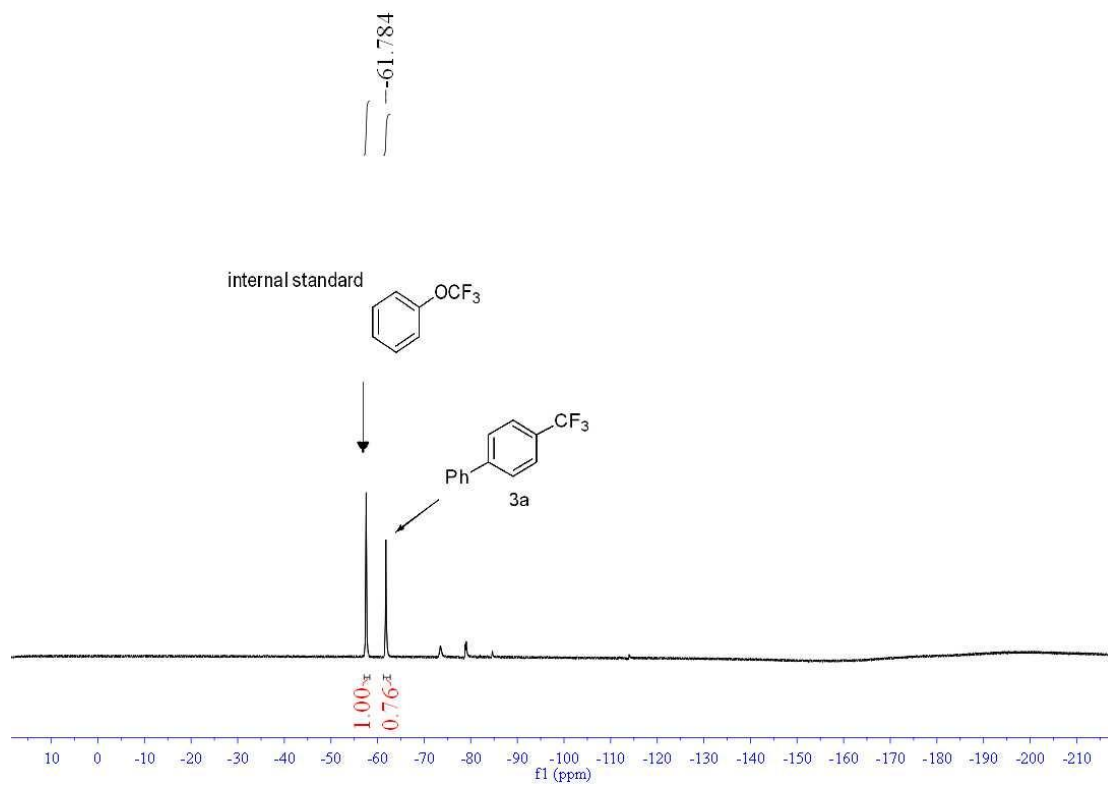

$^{19}\text{F}$  NMR spectrum of **3a** in  $\text{CDCl}_3$

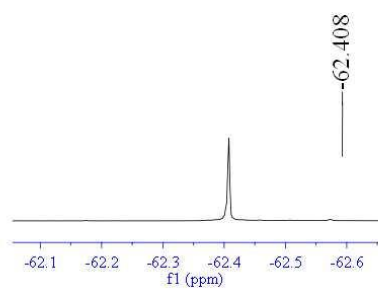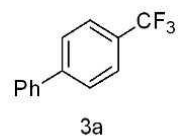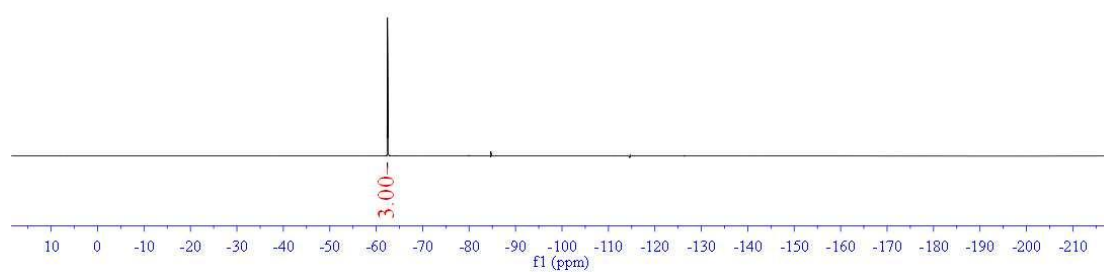

$^{13}\text{C}$  NMR spectrum of **3a** in  $\text{CDCl}_3$

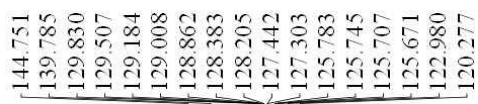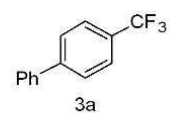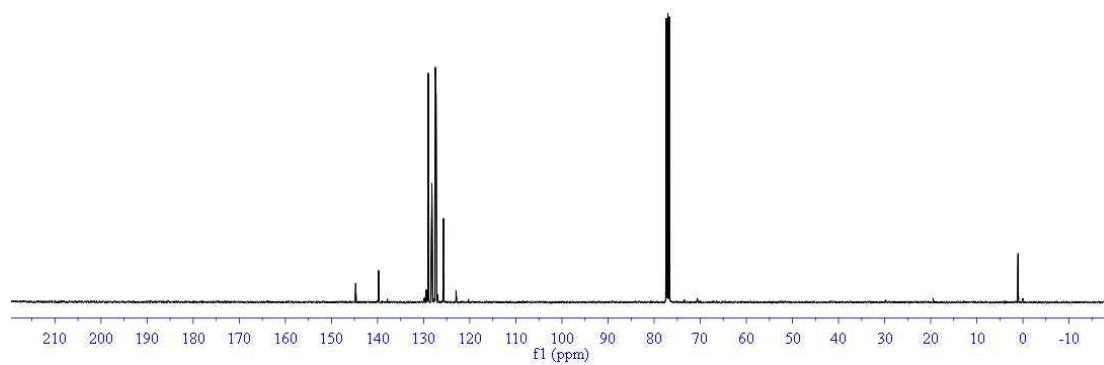

$^1\text{H}$  NMR spectrum of **3b** in  $\text{CDCl}_3$

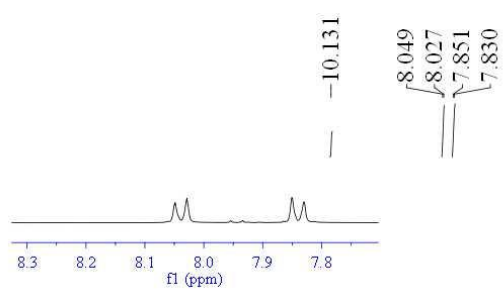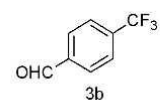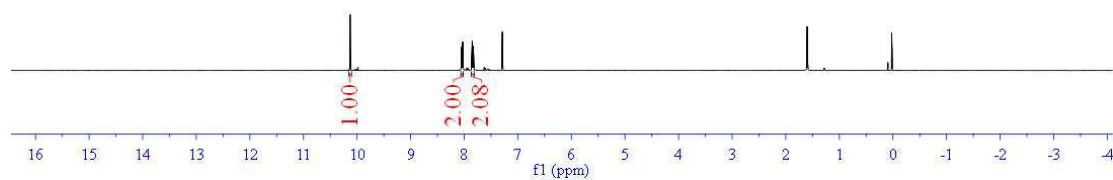

$^{19}\text{F}$  NMR spectrum of **3b** in  $\text{CDCl}_3$

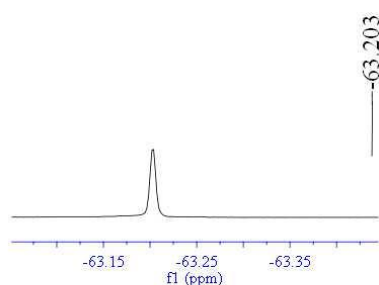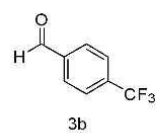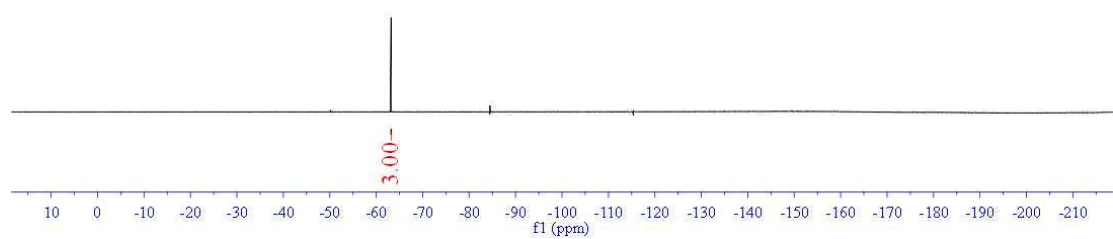

$^{13}\text{C}$  NMR spectrum of **3b** in  $\text{CDCl}_3$

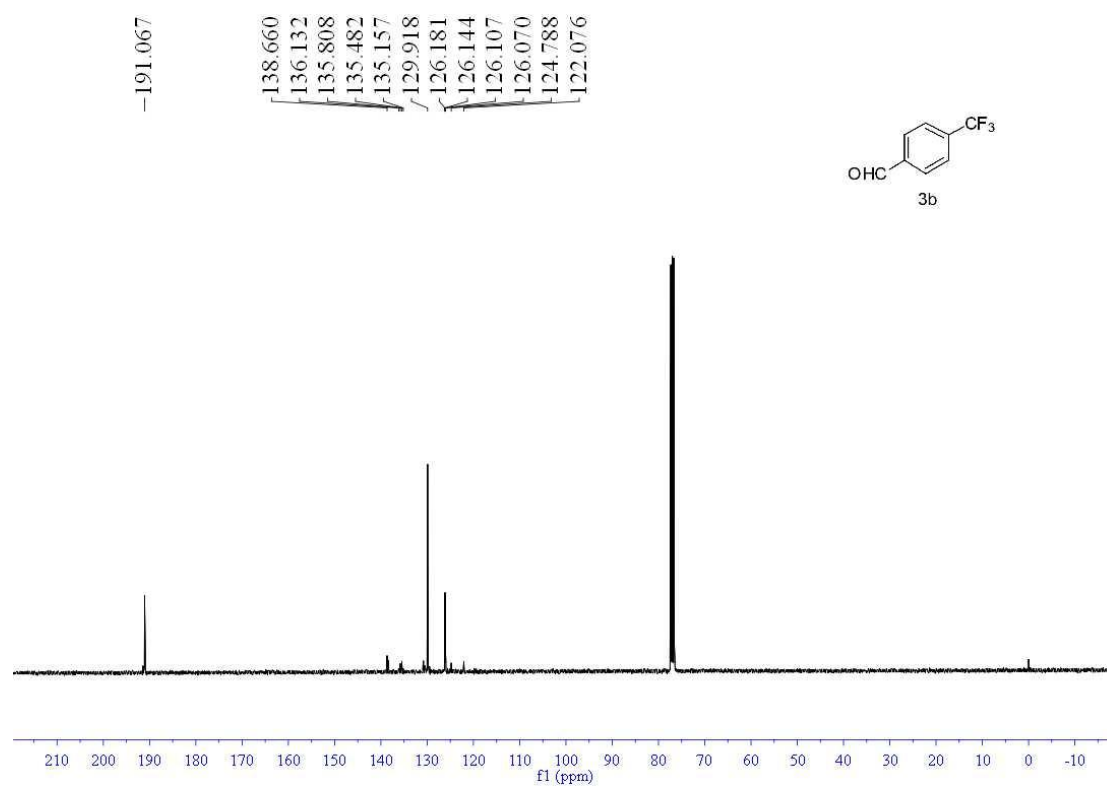

$^{19}\text{F}$  NMR spectrum of **3b** (unlocked)

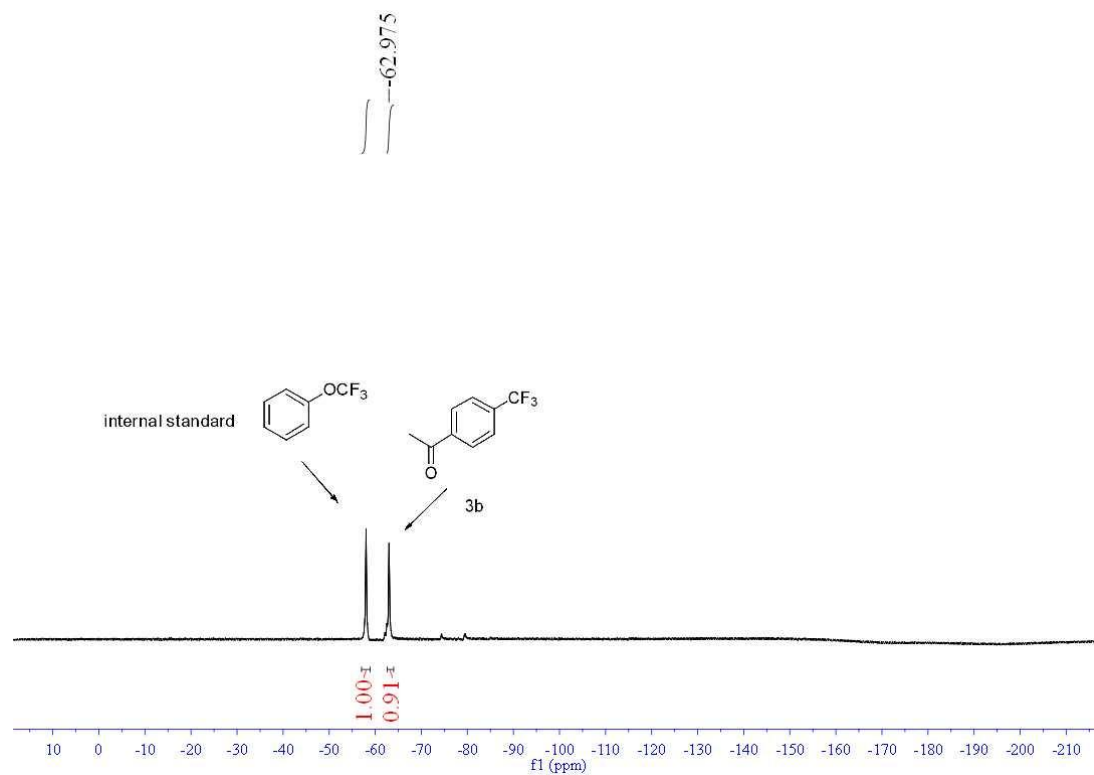

$^1\text{H}$  NMR spectrum of **3c** in  $\text{CDCl}_3$

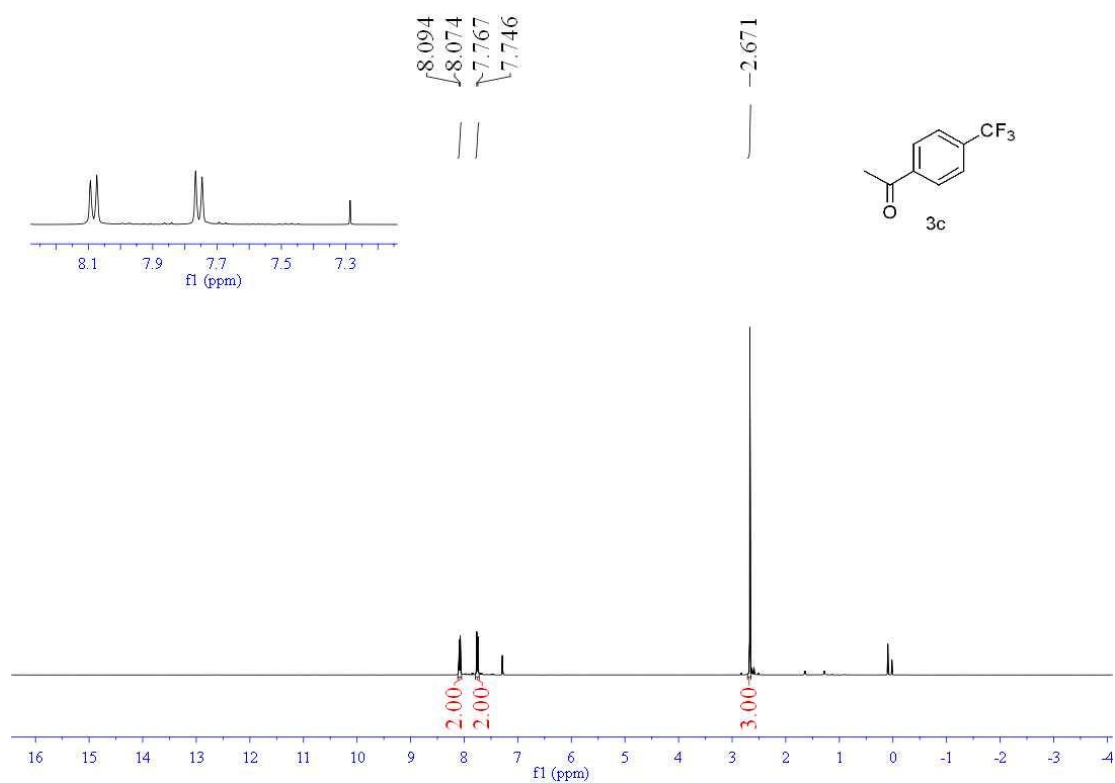

$^{19}\text{F}$  NMR spectrum of **3c** in  $\text{CDCl}_3$

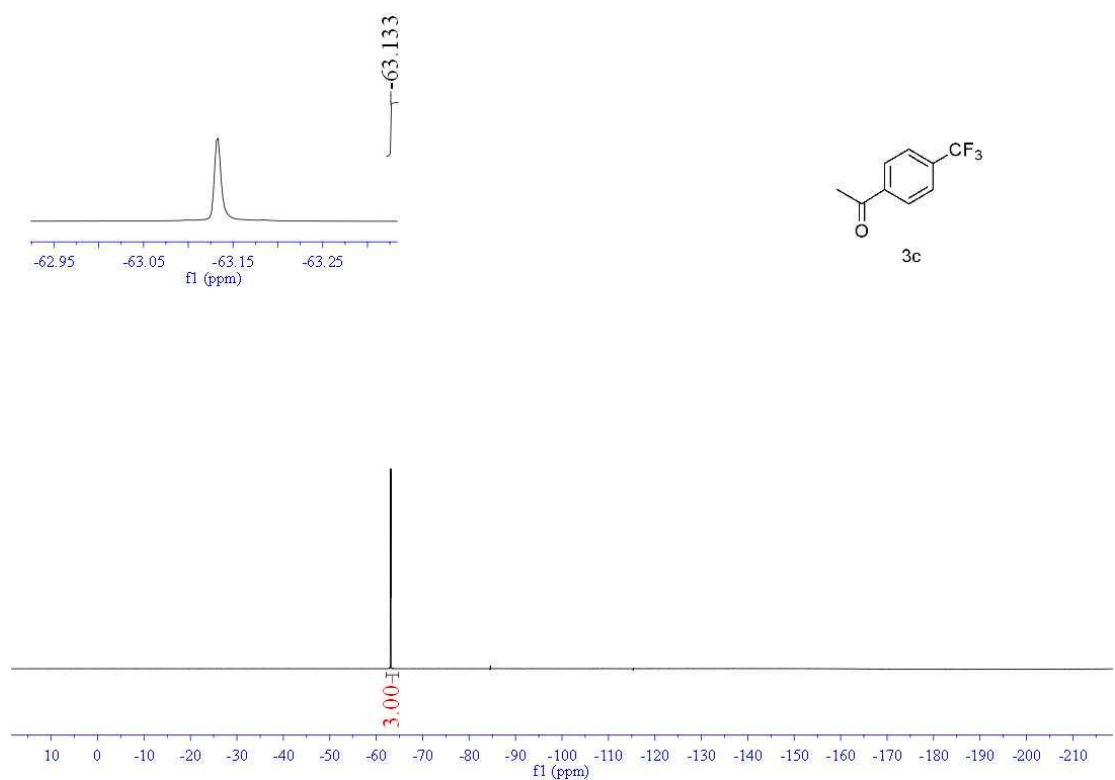

$^{13}\text{C}$  NMR spectrum of **3c** in  $\text{CDCl}_3$

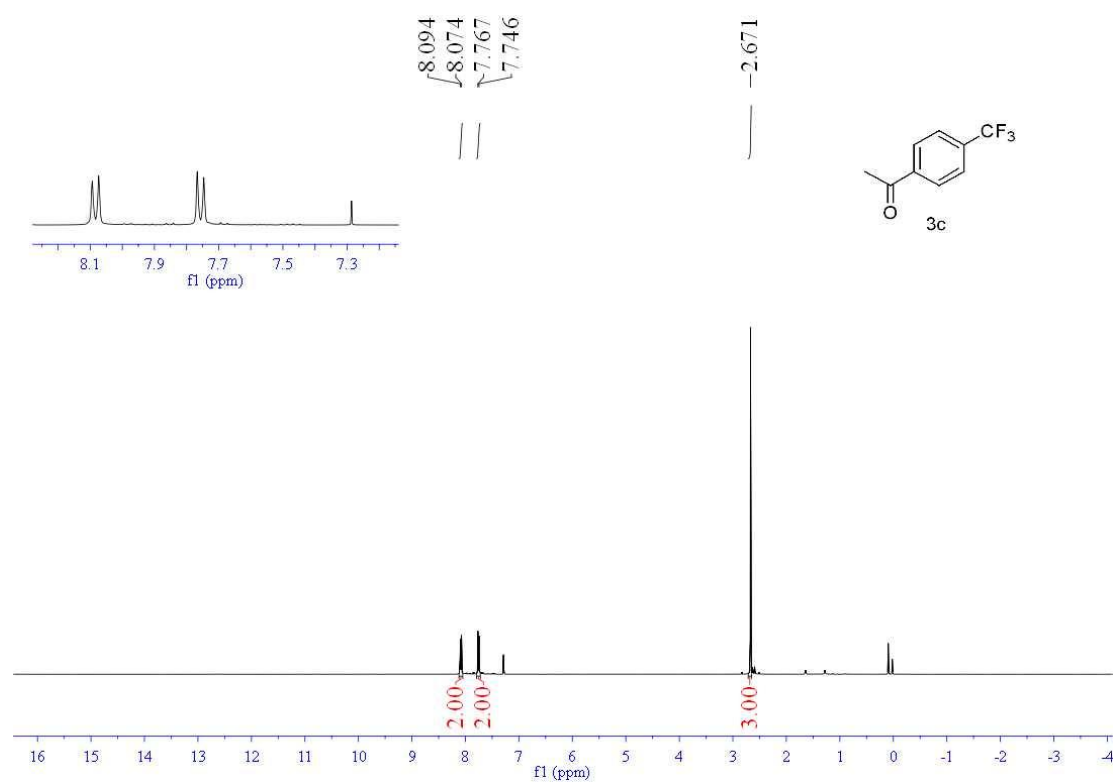

$^{19}\text{F}$  NMR spectrum of **3c** (unlocked)

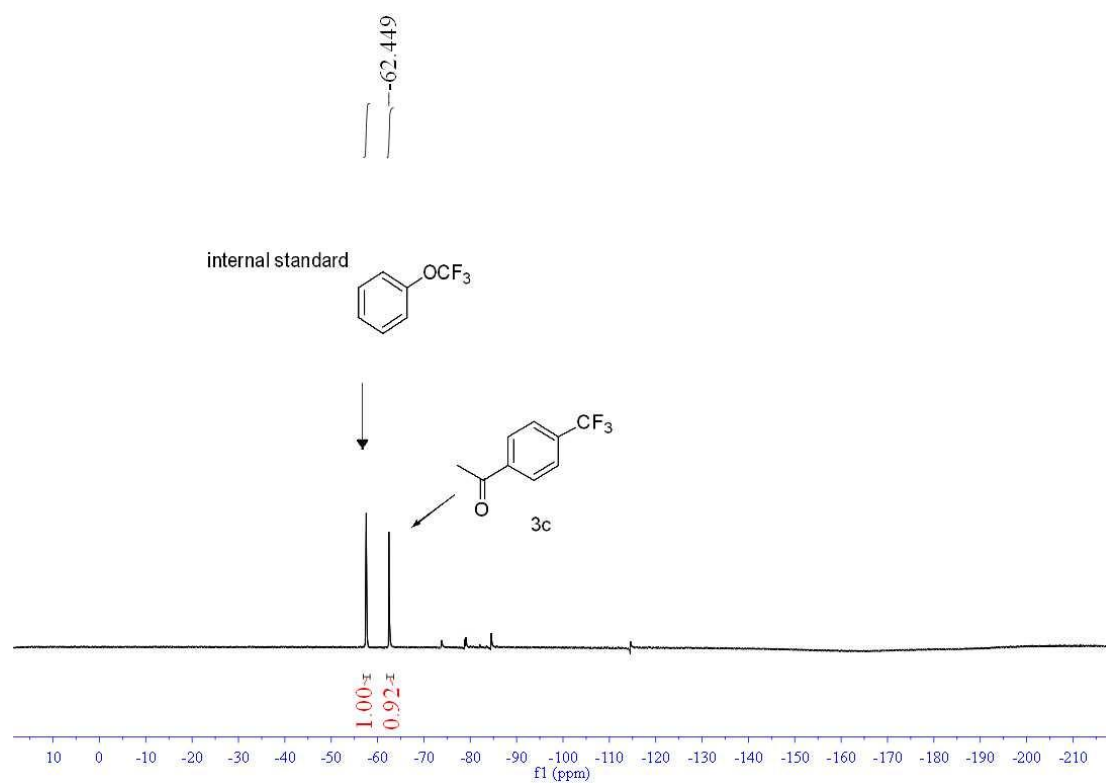

$^1\text{H}$  NMR spectrum of **3d** in  $\text{CDCl}_3$

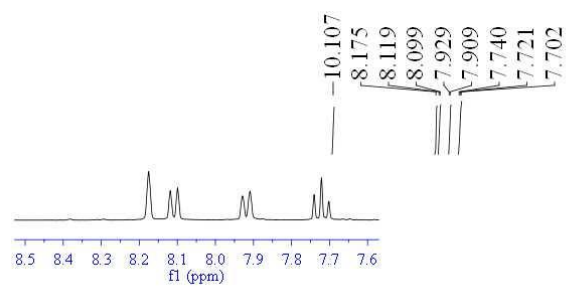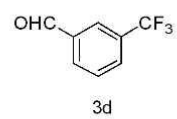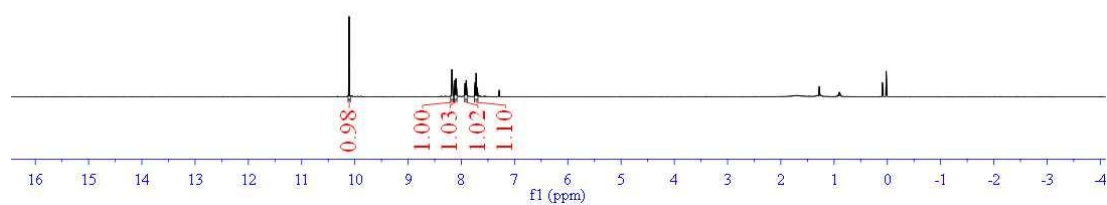

$^{19}\text{F}$  NMR spectrum of **3d** in  $\text{CDCl}_3$

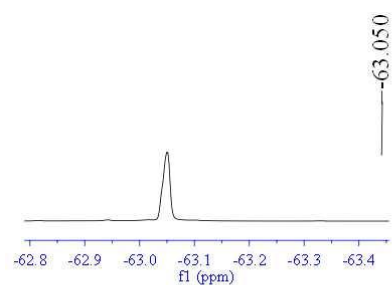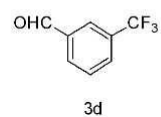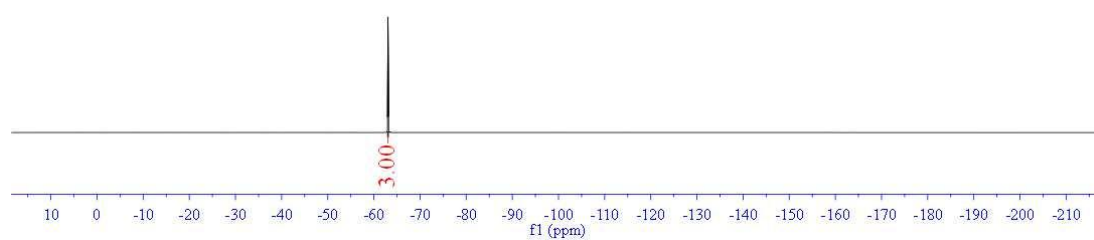

$^{13}\text{C}$  NMR spectrum of **3d** in  $\text{CDCl}_3$

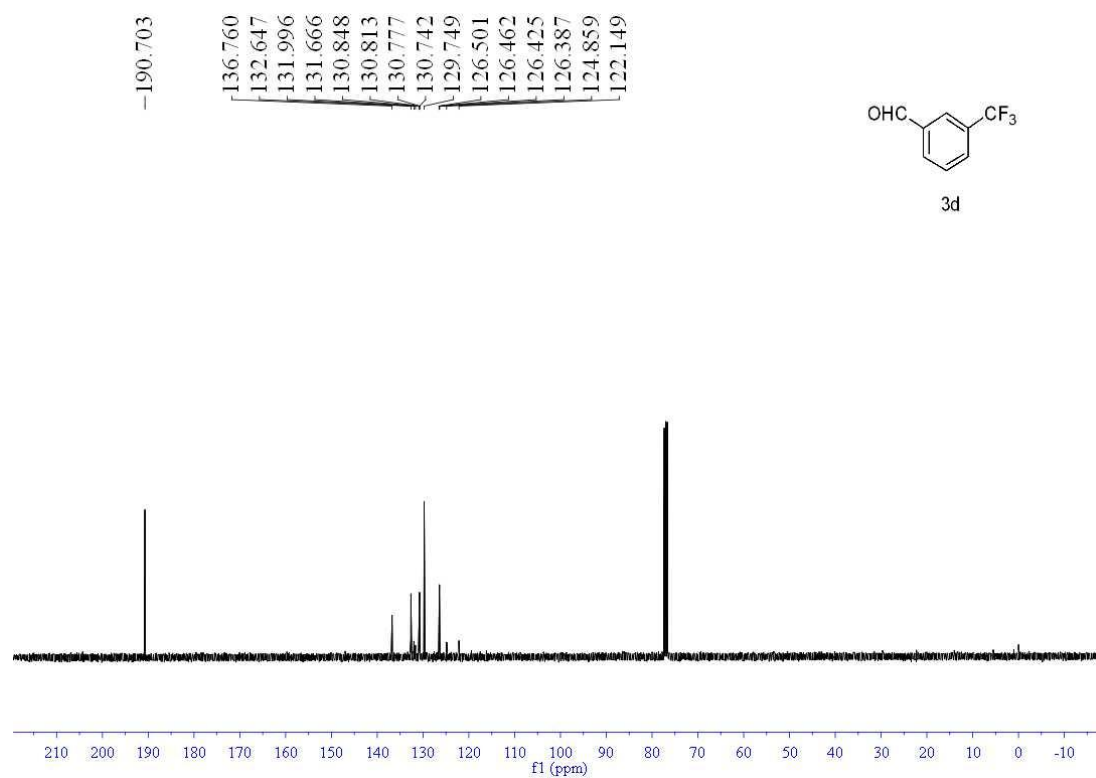

$^{19}\text{F}$  NMR spectrum of **3d** (unlocked)

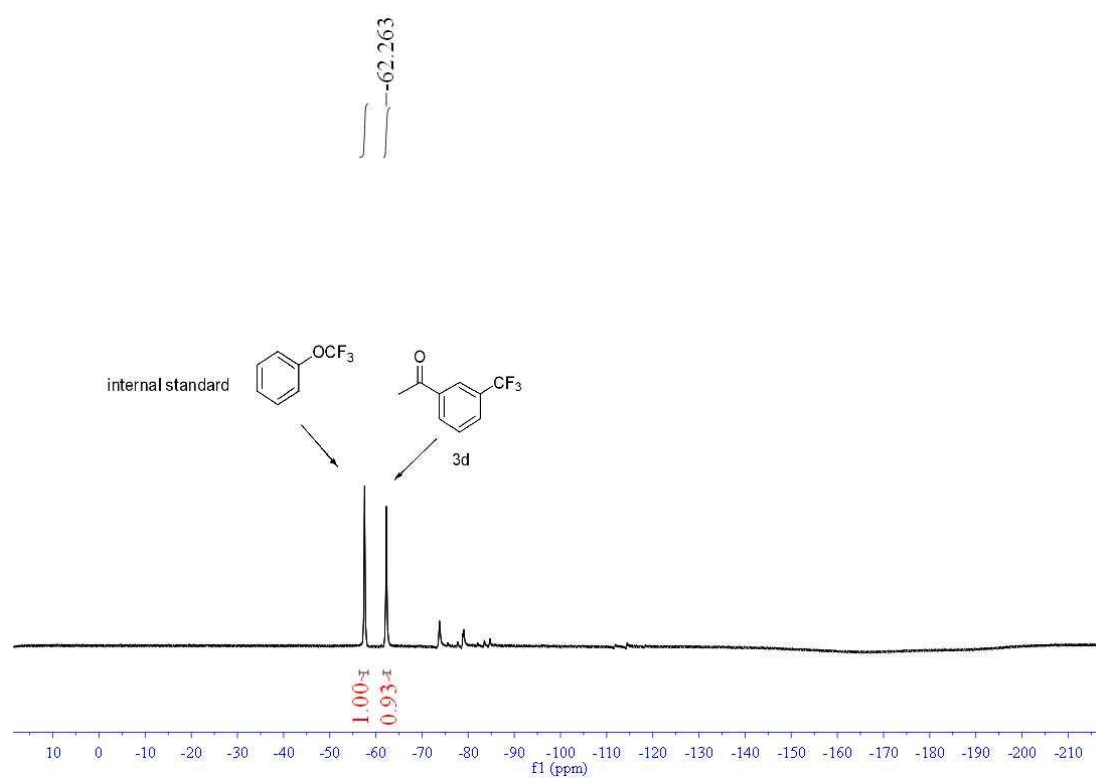

$^1\text{H}$  NMR spectrum of **3e** in  $\text{CDCl}_3$

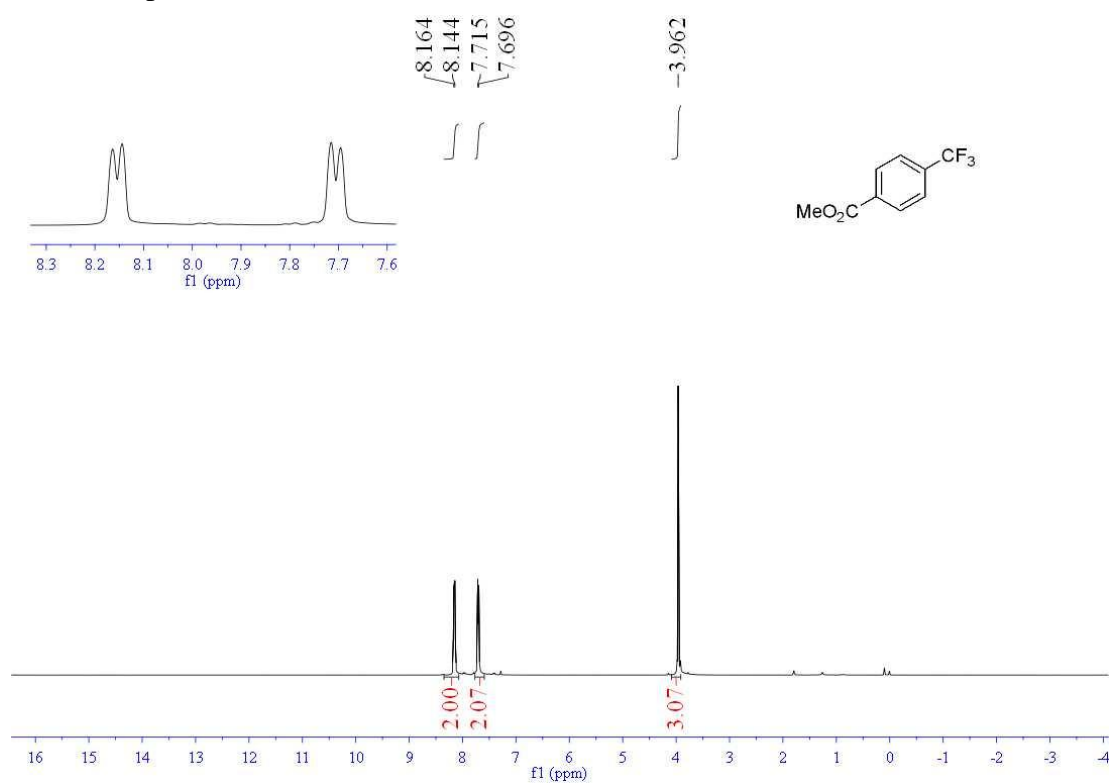

$^{19}\text{F}$  NMR spectrum of **3e** in  $\text{CDCl}_3$

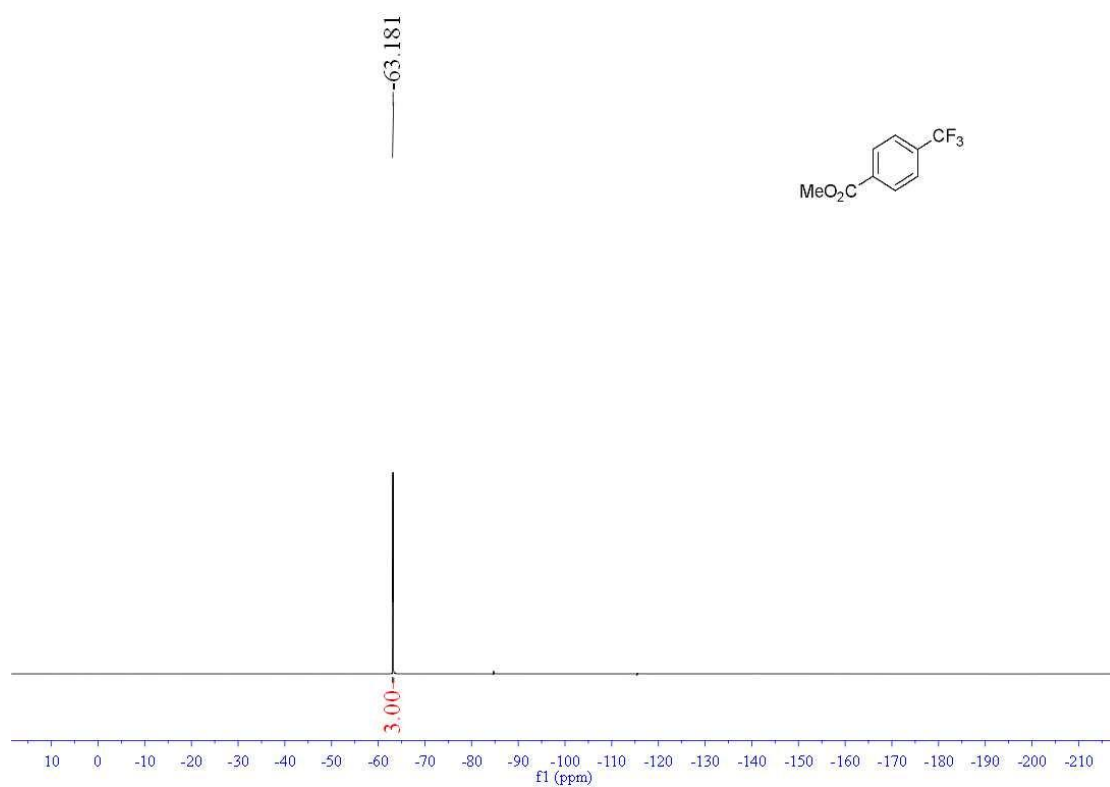

$^{13}\text{C}$  NMR spectrum of **3e** in  $\text{CDCl}_3$

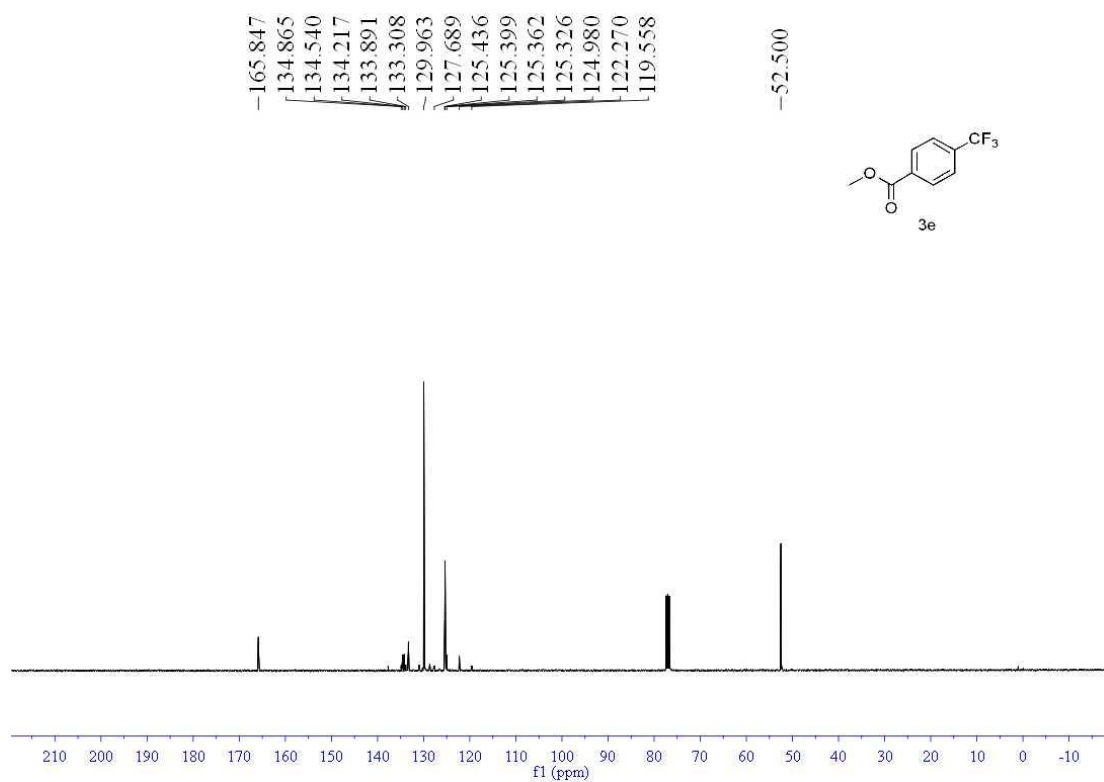

$^{19}\text{F}$  NMR spectrum of **3e** (unlocked)

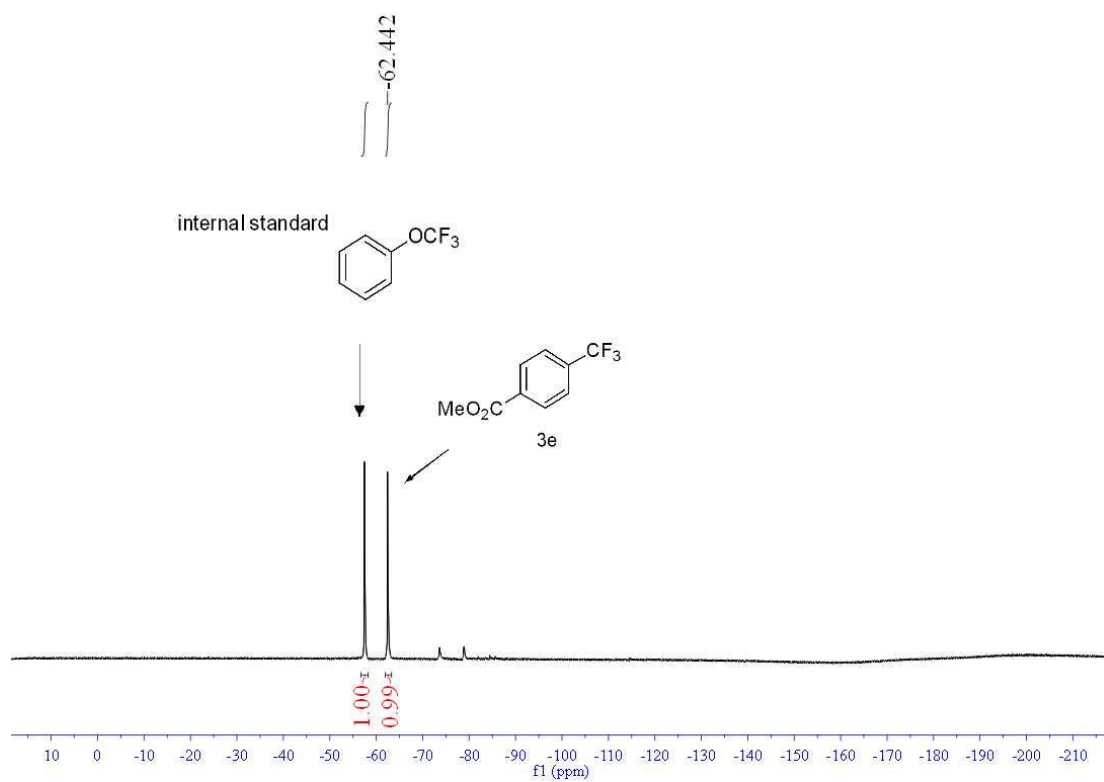

$^1\text{H}$  NMR spectrum of **3f**

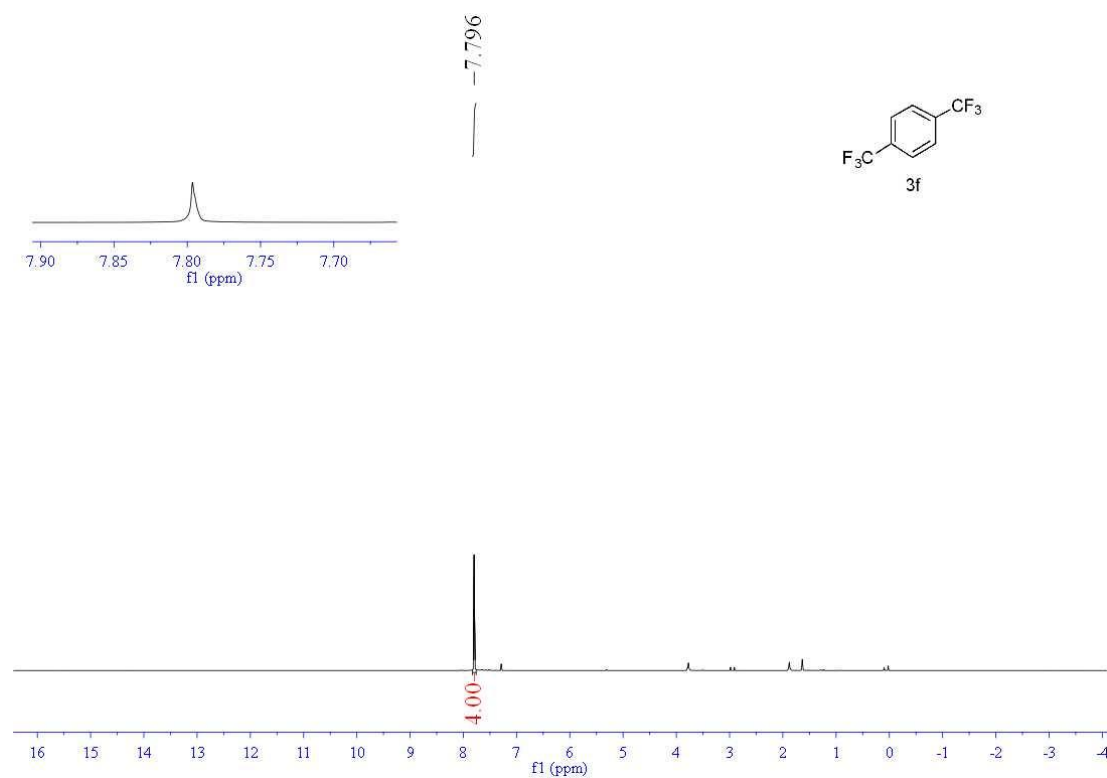

$^{19}\text{F}$  NMR spectrum of **3f**

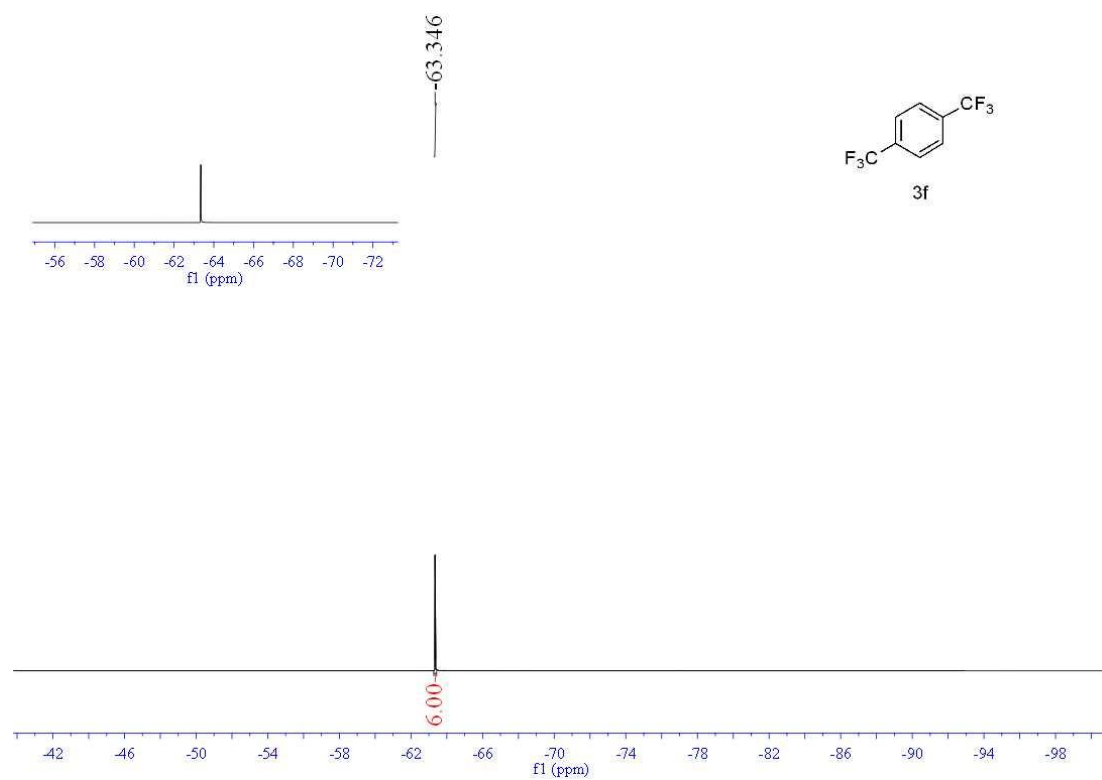

$^{13}\text{C}$  NMR spectrum of **3f**

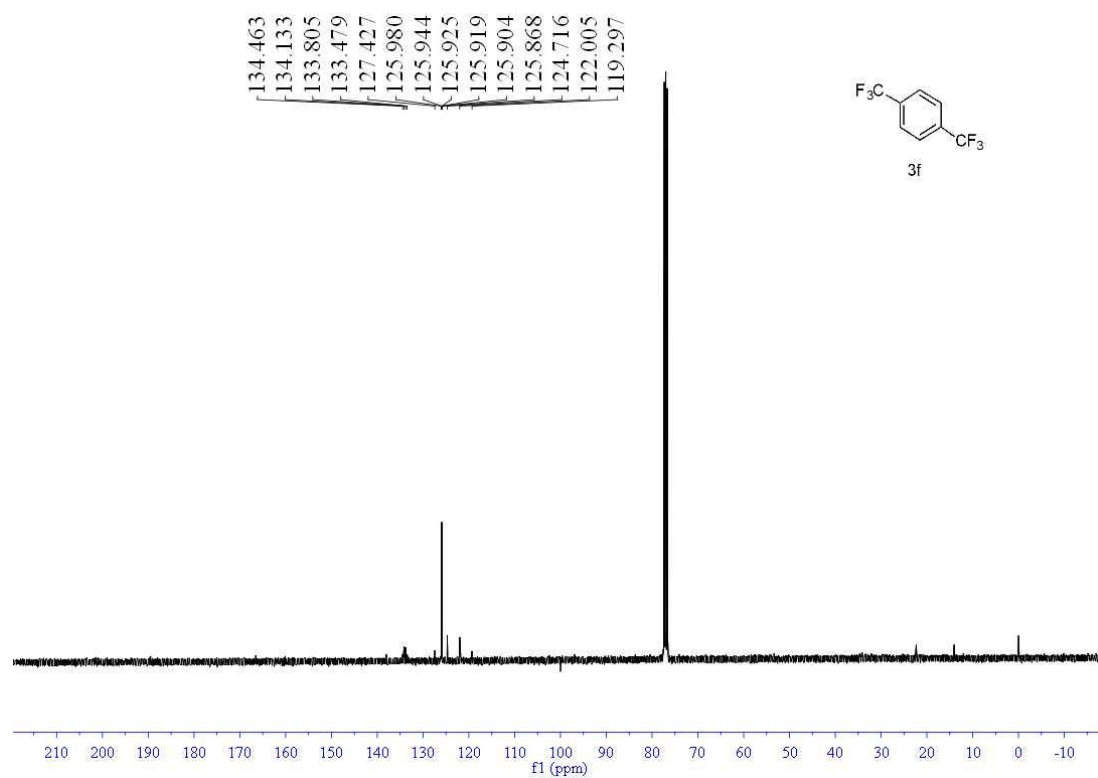

$^{19}\text{F}$  NMR spectrum of **3f** (unlocked)

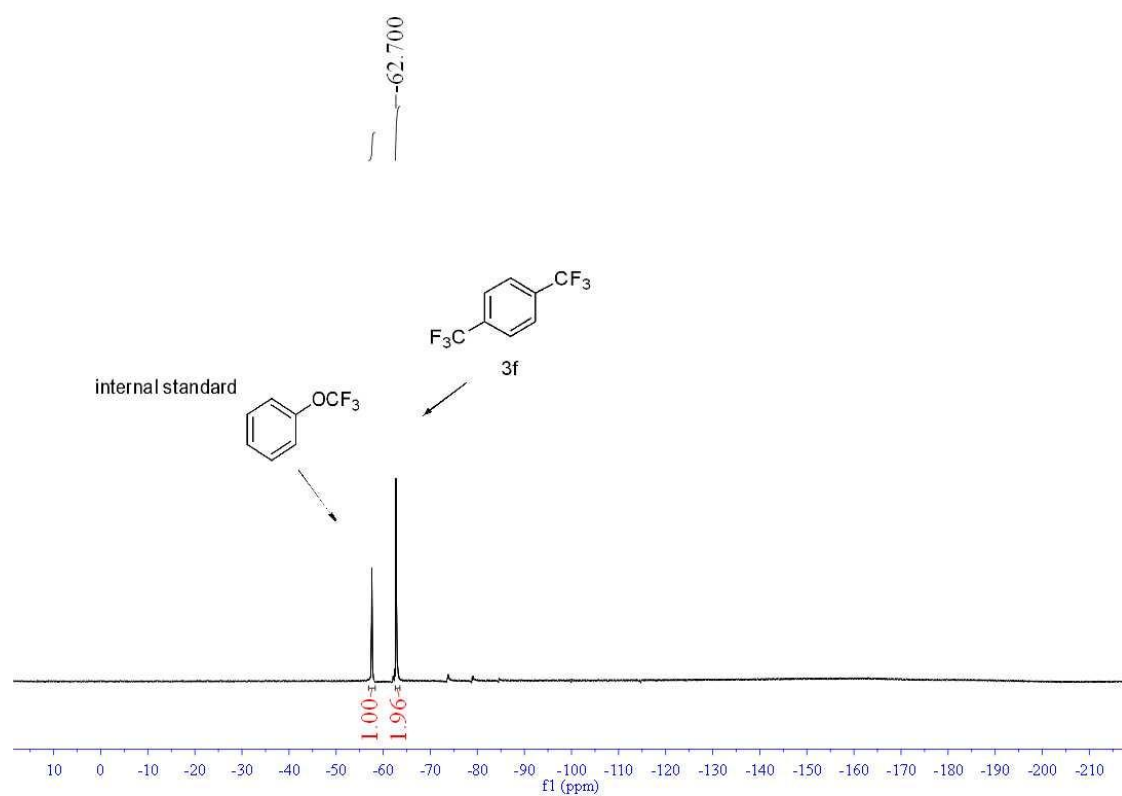

$^1\text{H}$  NMR spectrum of **3g** in  $\text{CDCl}_3$

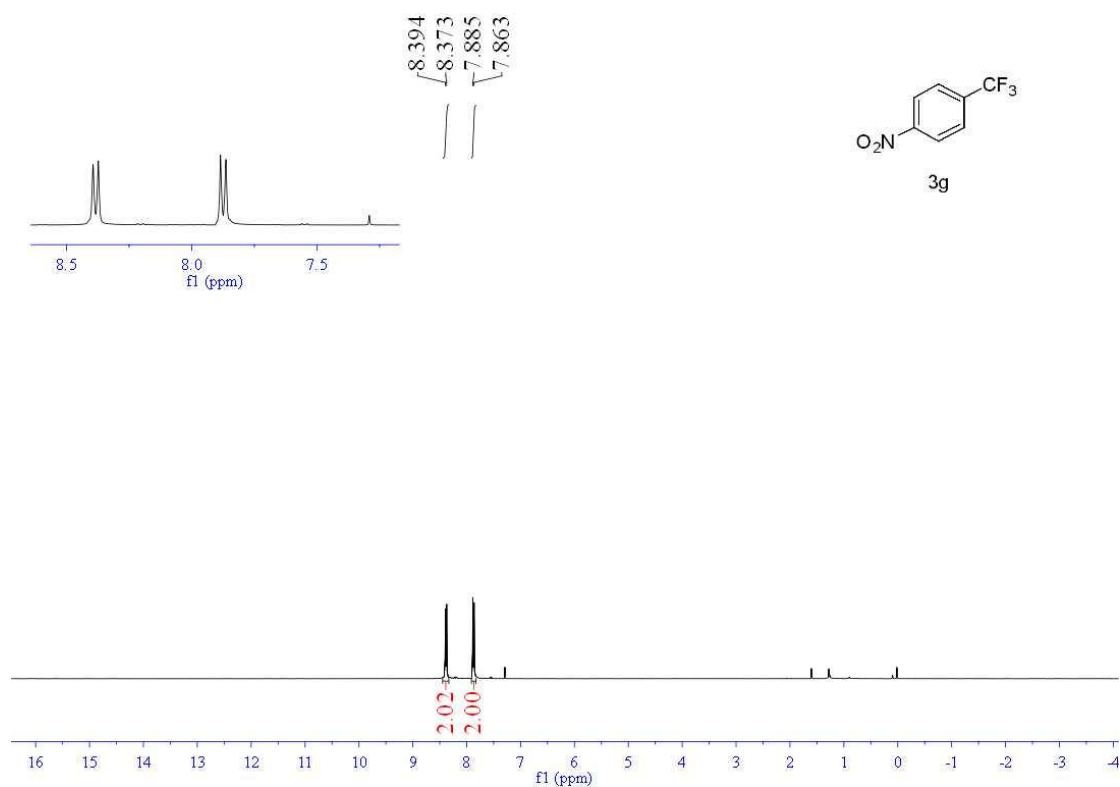

$^{19}\text{F}$  NMR spectrum of **3g** in  $\text{CDCl}_3$

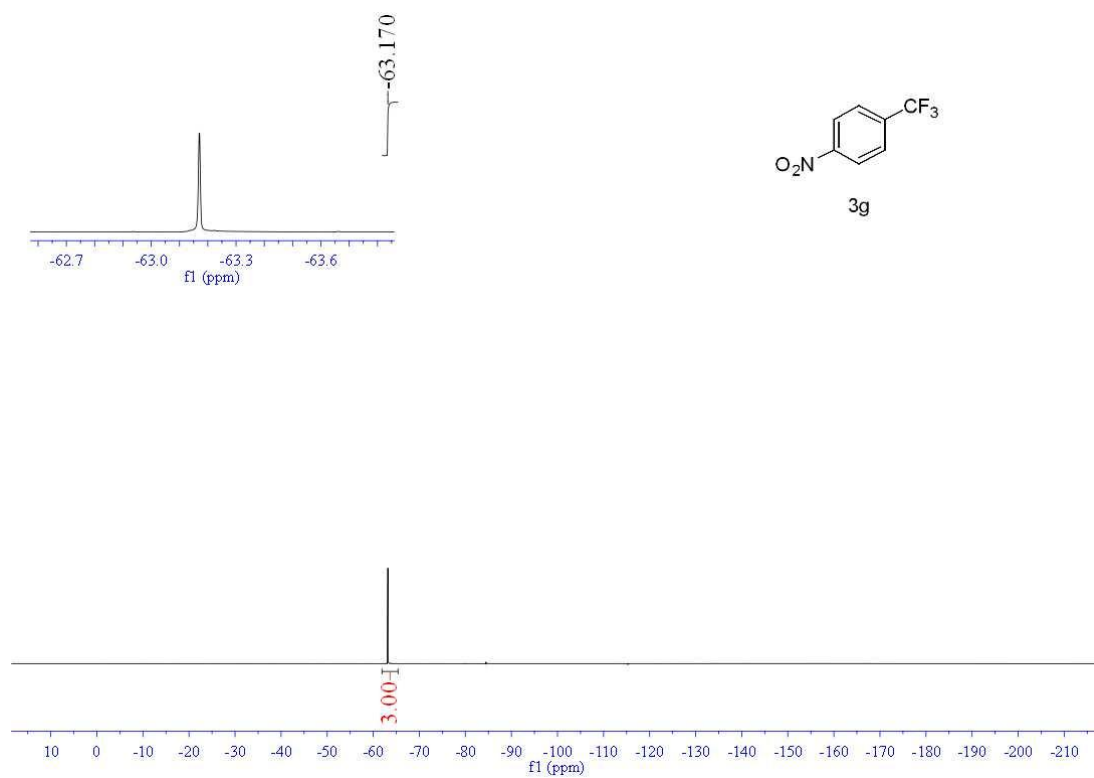

$^{13}\text{C}$  NMR spectrum of **3g** in  $\text{CDCl}_3$

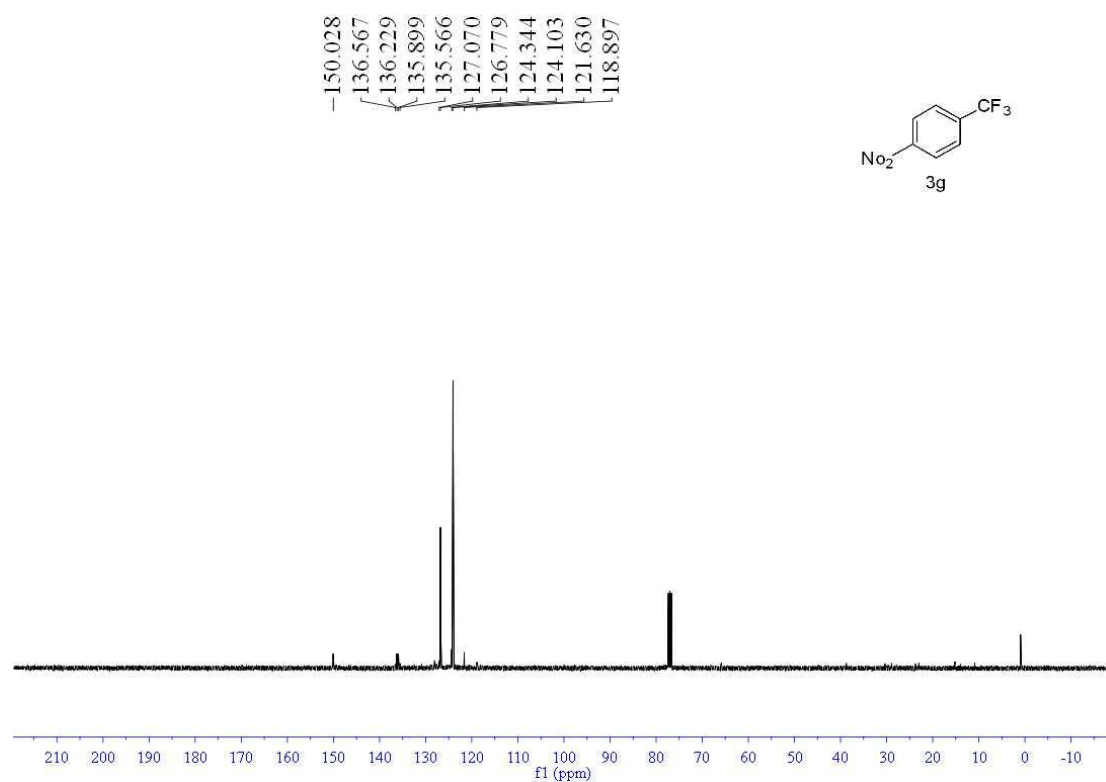

$^{19}\text{F}$  NMR spectrum of **3g** (unlocked)

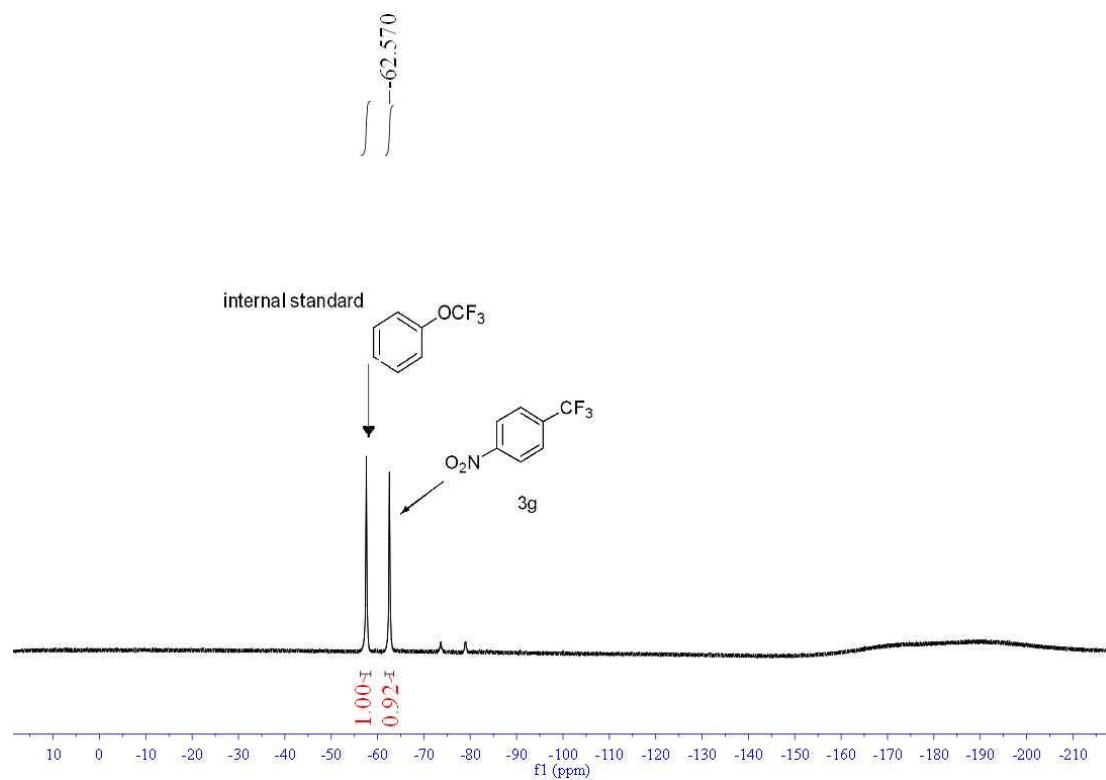

$^1\text{H}$  NMR spectrum of **3h** in  $\text{CDCl}_3$

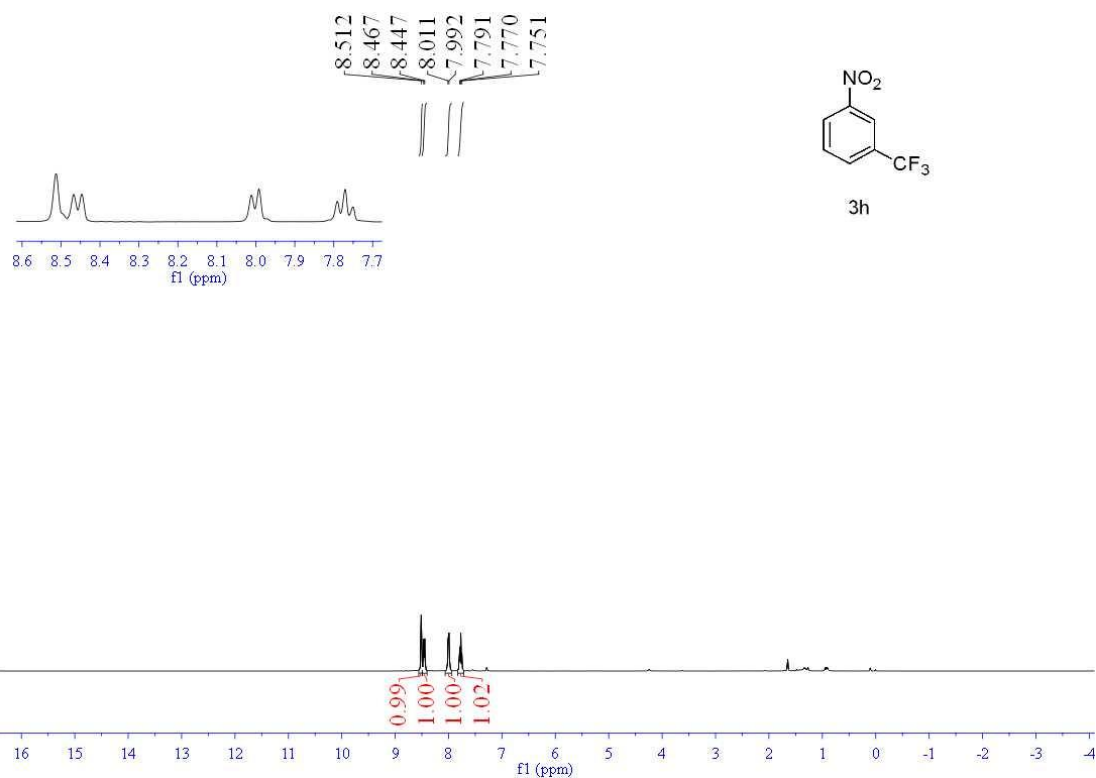

$^{19}\text{F}$  NMR spectrum of **3h** in  $\text{CDCl}_3$

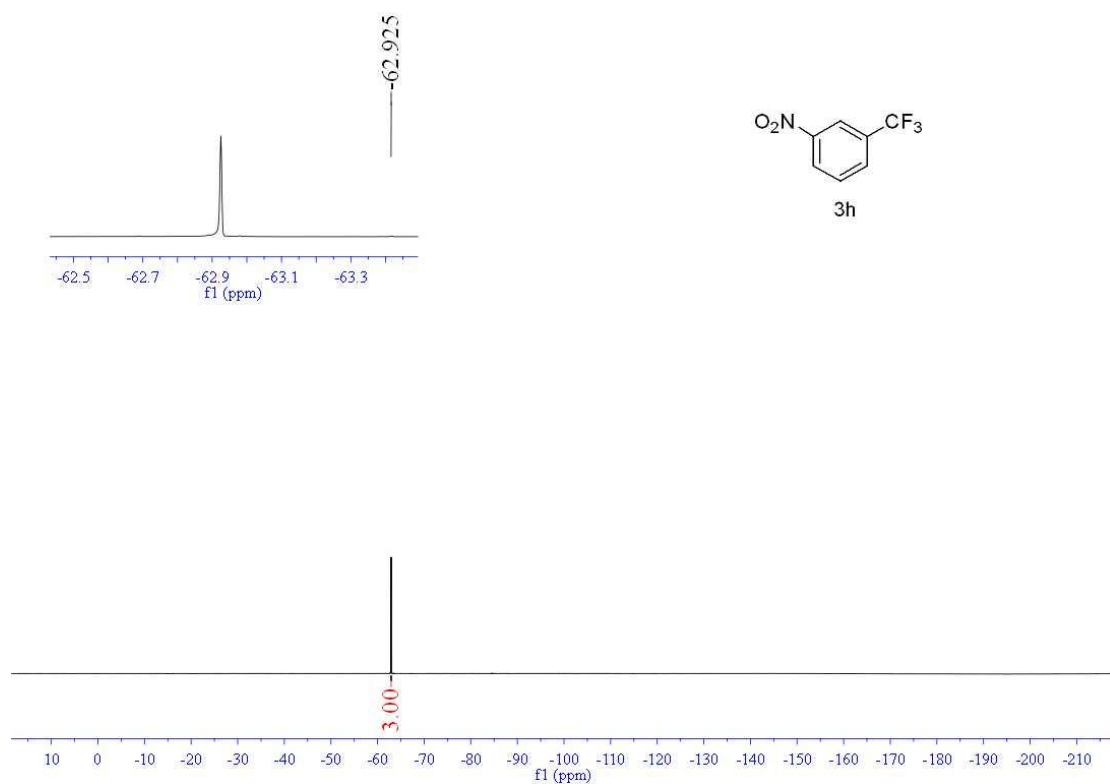

$^{13}\text{C}$  NMR spectrum of **3h** in  $\text{CDCl}_3$

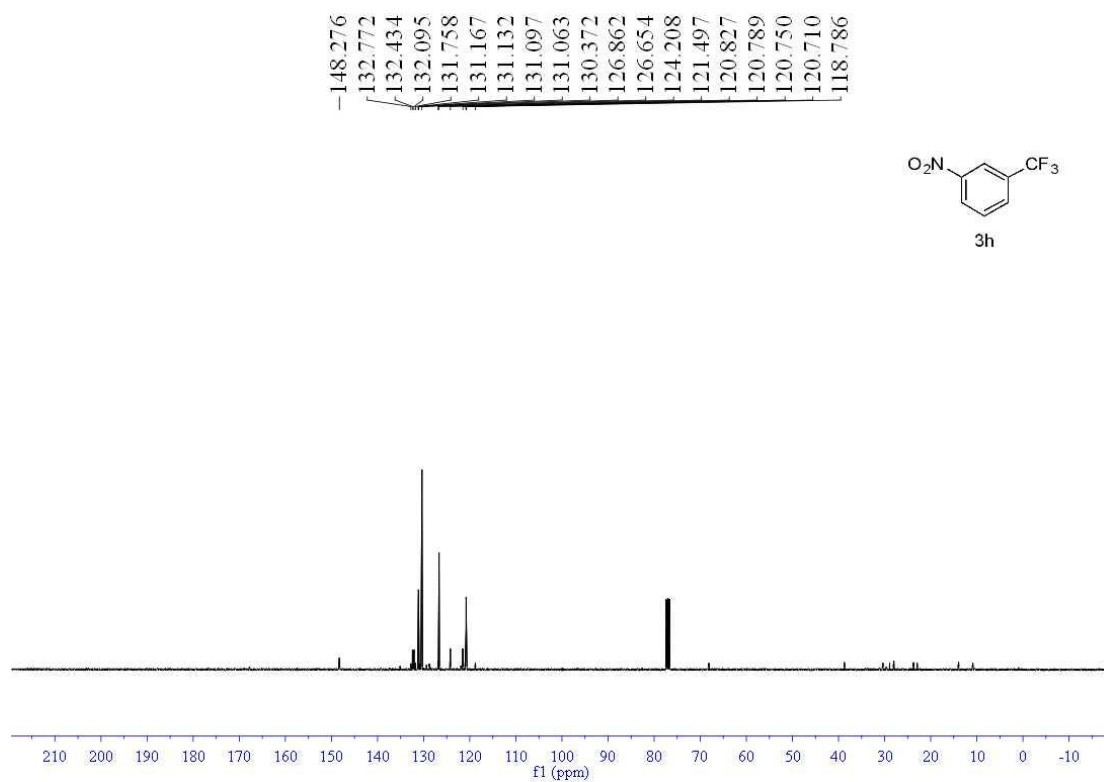

$^{19}\text{F}$  NMR spectrum of **3h** (unlocked)

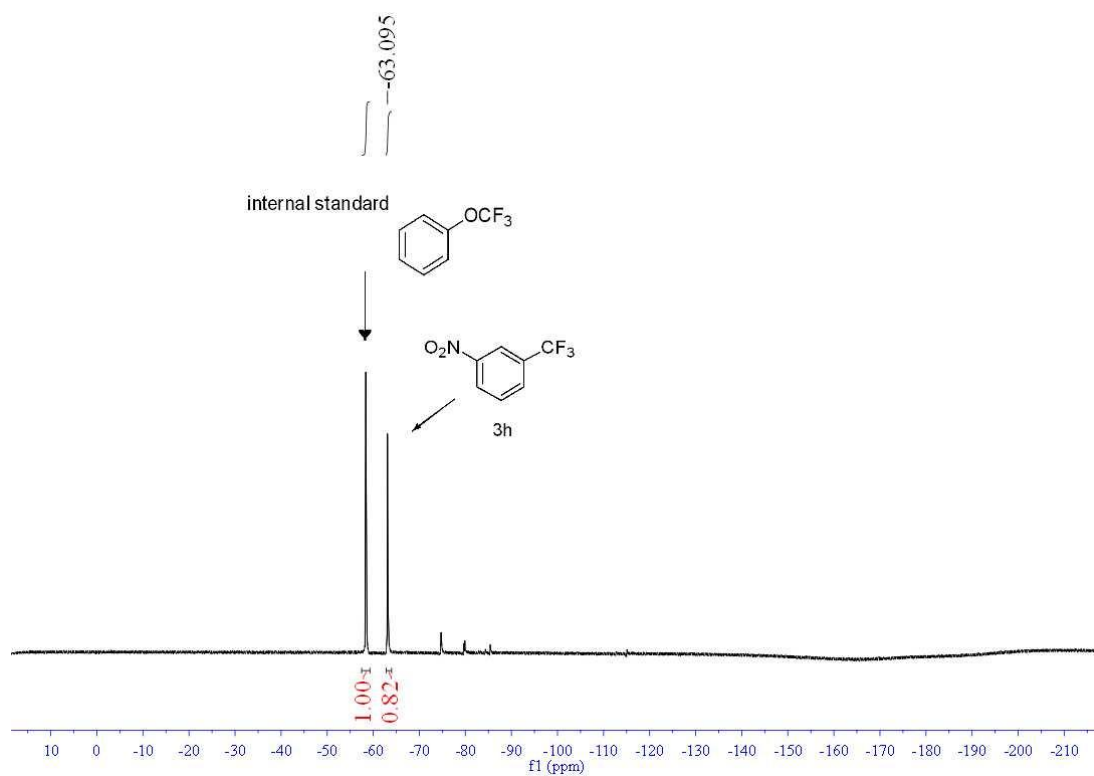

$^1\text{H}$  NMR spectrum of **3i** in  $\text{CDCl}_3$

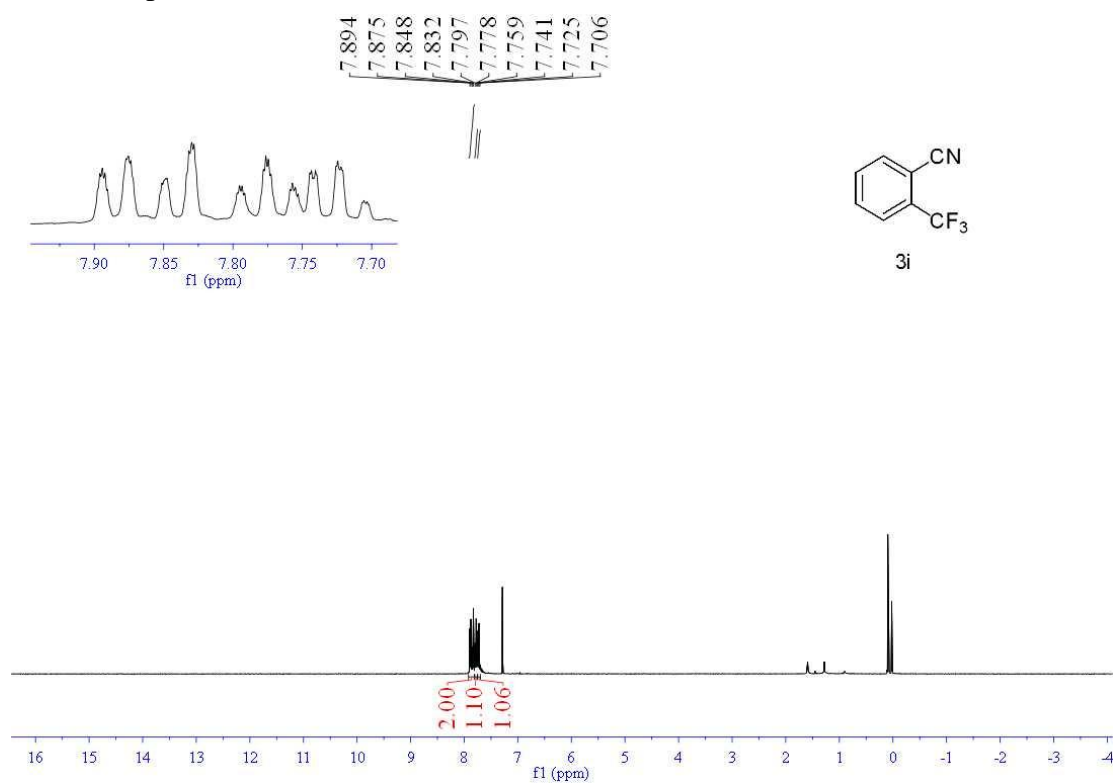

$^{19}\text{F}$  NMR spectrum of **3i** in  $\text{CDCl}_3$

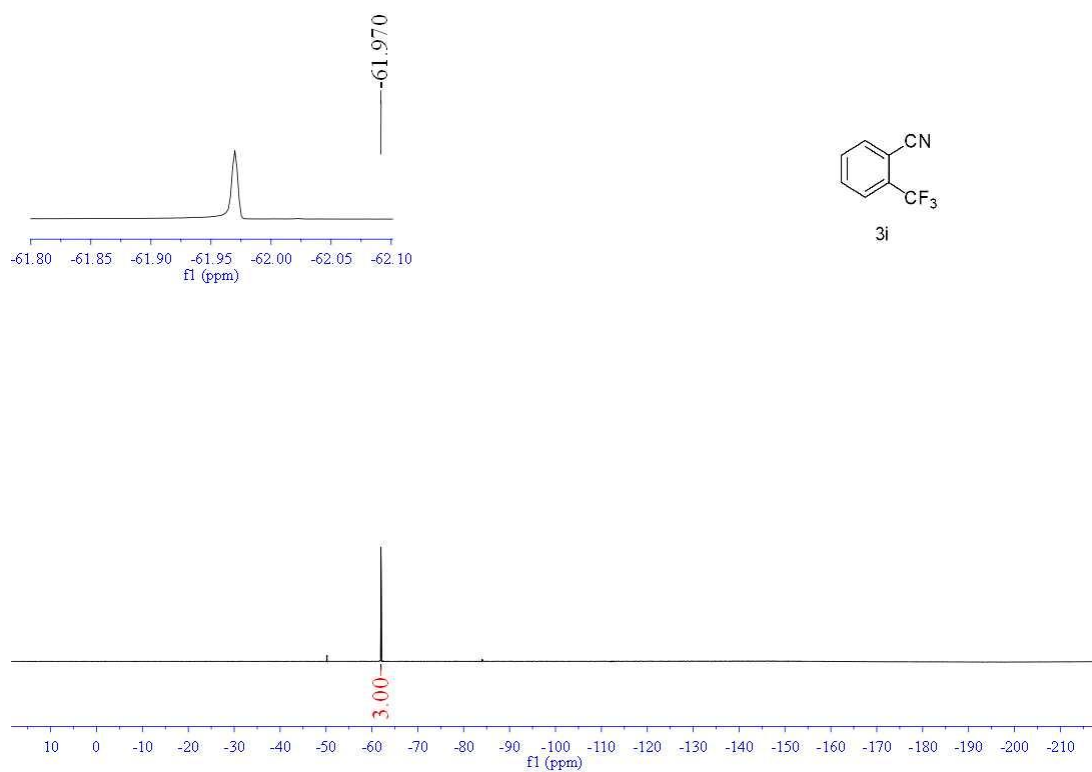

$^{13}\text{C}$  NMR spectrum of **3i** in  $\text{CDCl}_3$

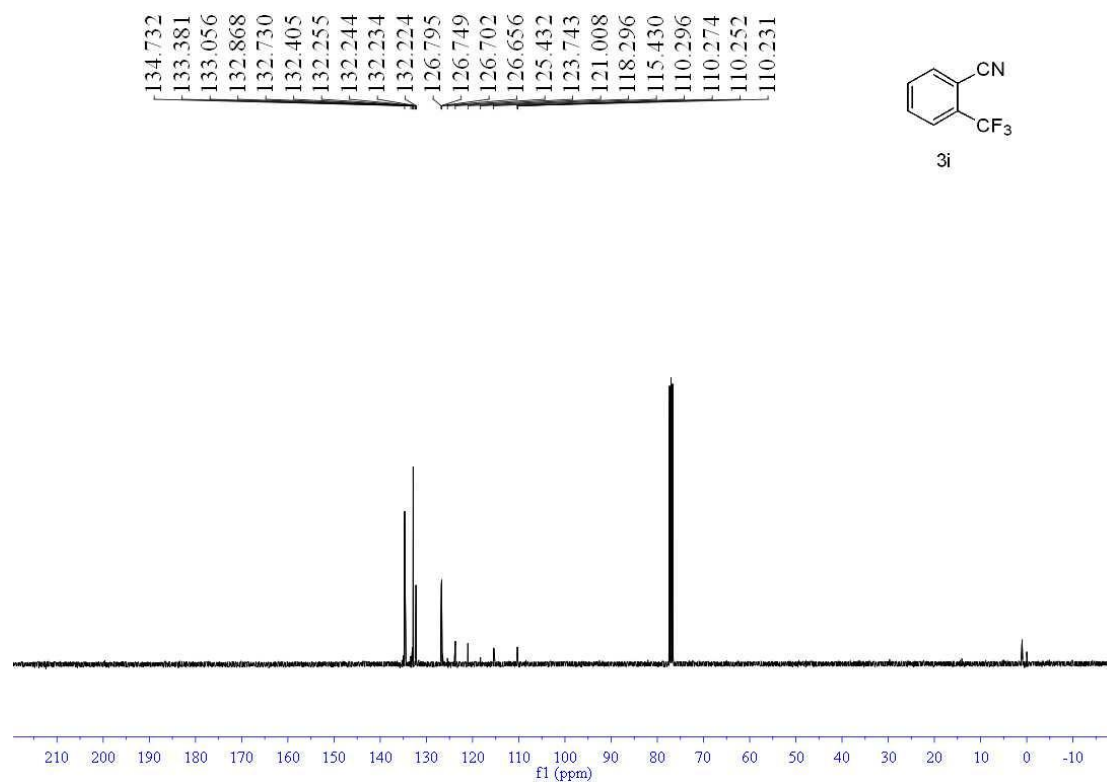

$^{19}\text{F}$  NMR spectrum of **3i** (unlocked)

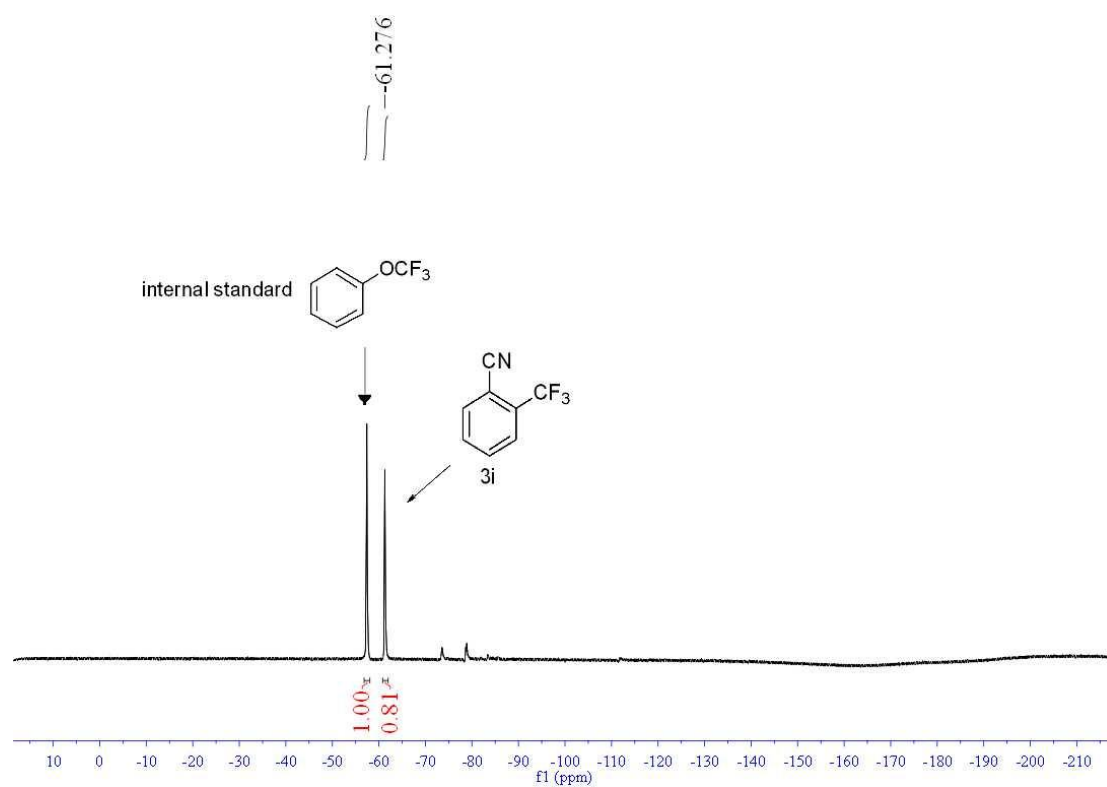

$^1\text{H}$  NMR spectrum of **3j** in  $\text{CDCl}_3$

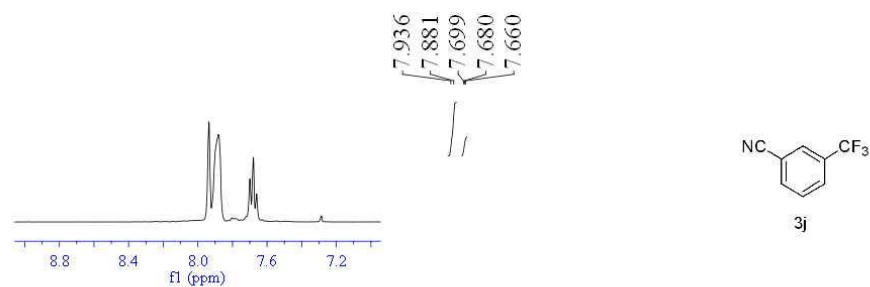

$^{19}\text{F}$  NMR spectrum of **3j** in  $\text{CDCl}_3$

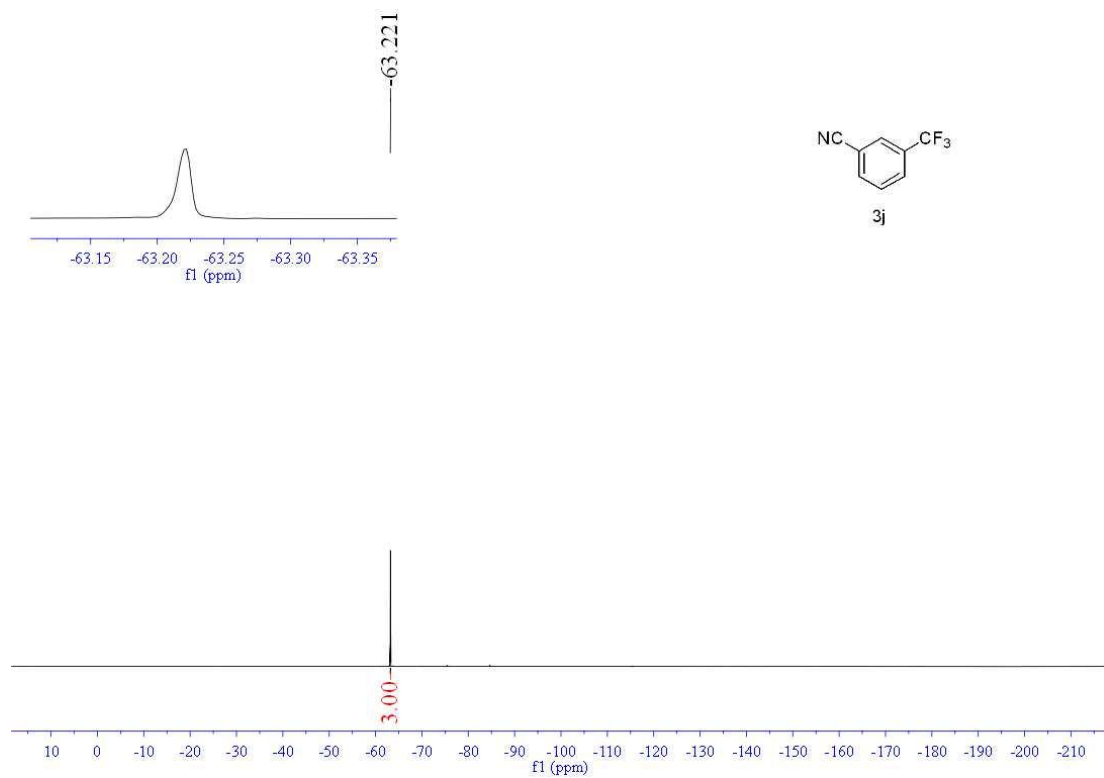

$^{13}\text{C}$  NMR spectrum of **3j** in  $\text{CDCl}_3$

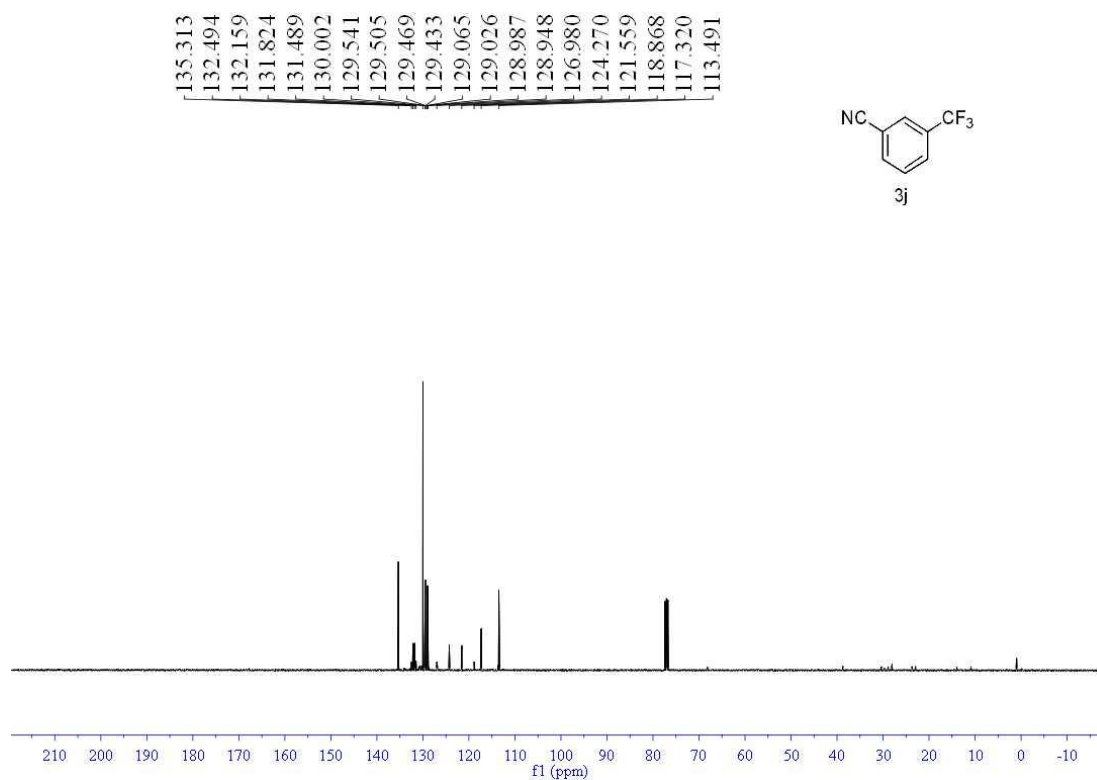

$^{19}\text{F}$  NMR spectrum of **3j** (unlocked)

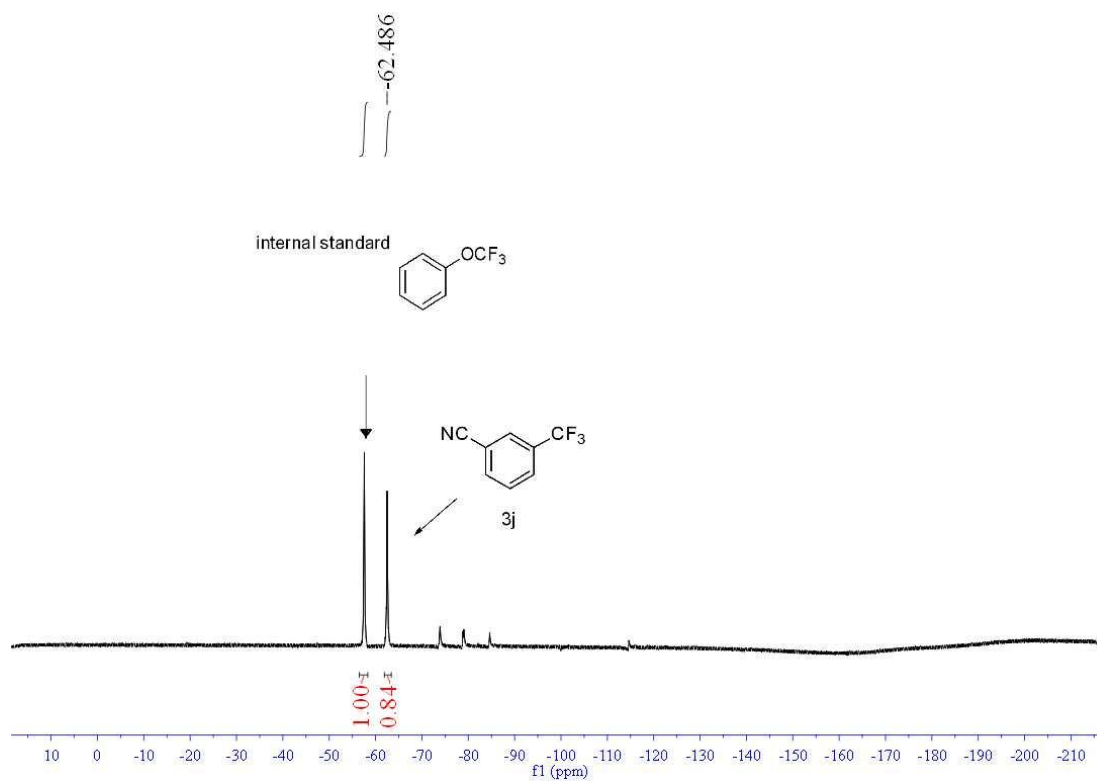

$^{19}\text{F}$  NMR spectrum of **3k** in  $\text{CDCl}_3$

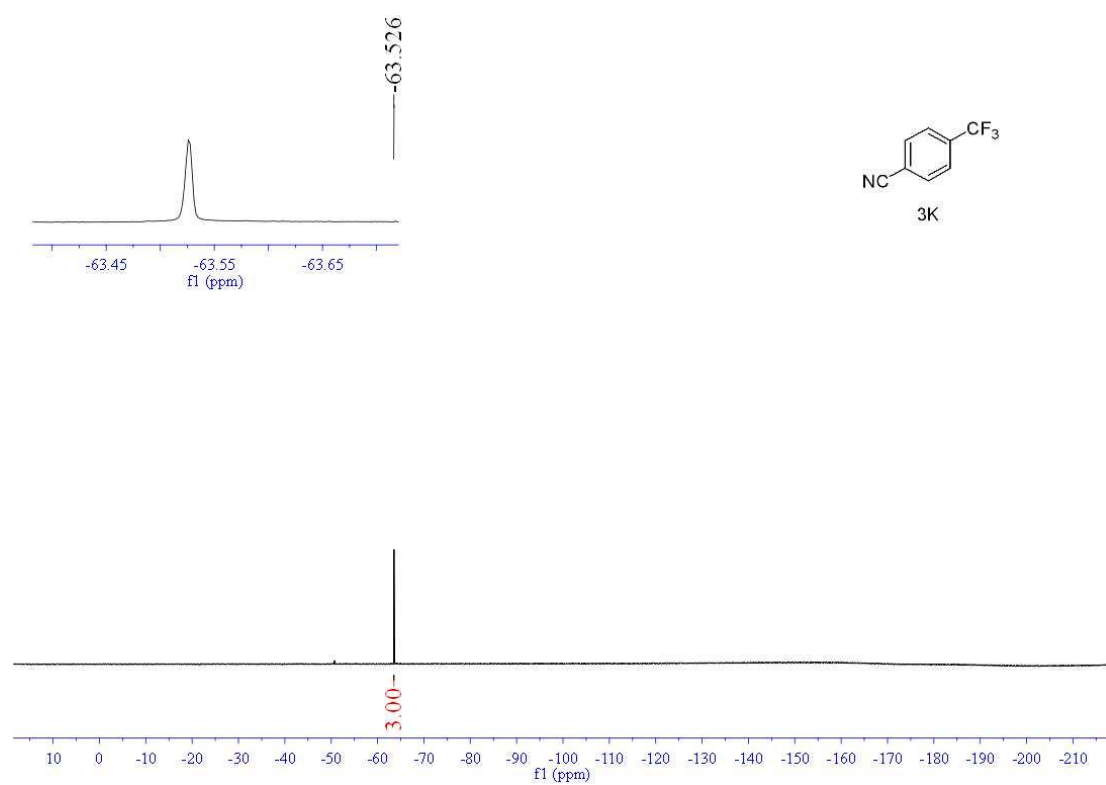

$^1\text{H}$  NMR spectrum of **3k** in  $\text{CDCl}_3$

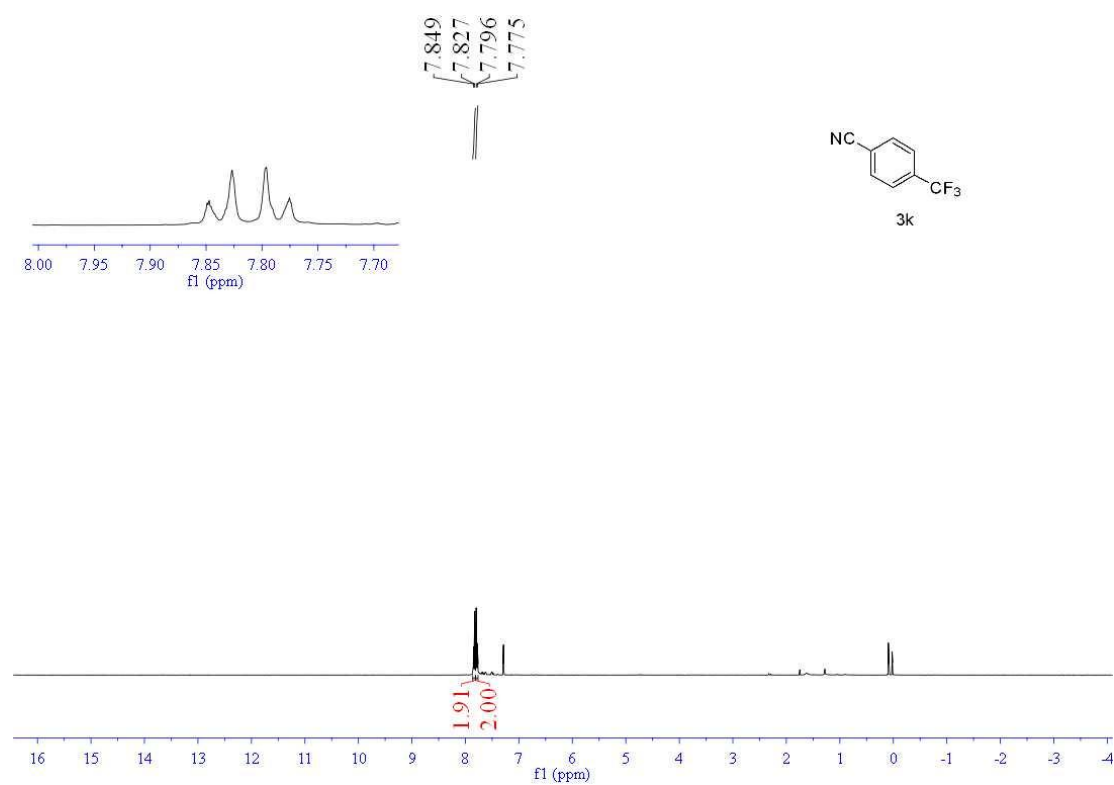

$^{13}\text{C}$  NMR spectrum of **3k** in  $\text{CDCl}_3$

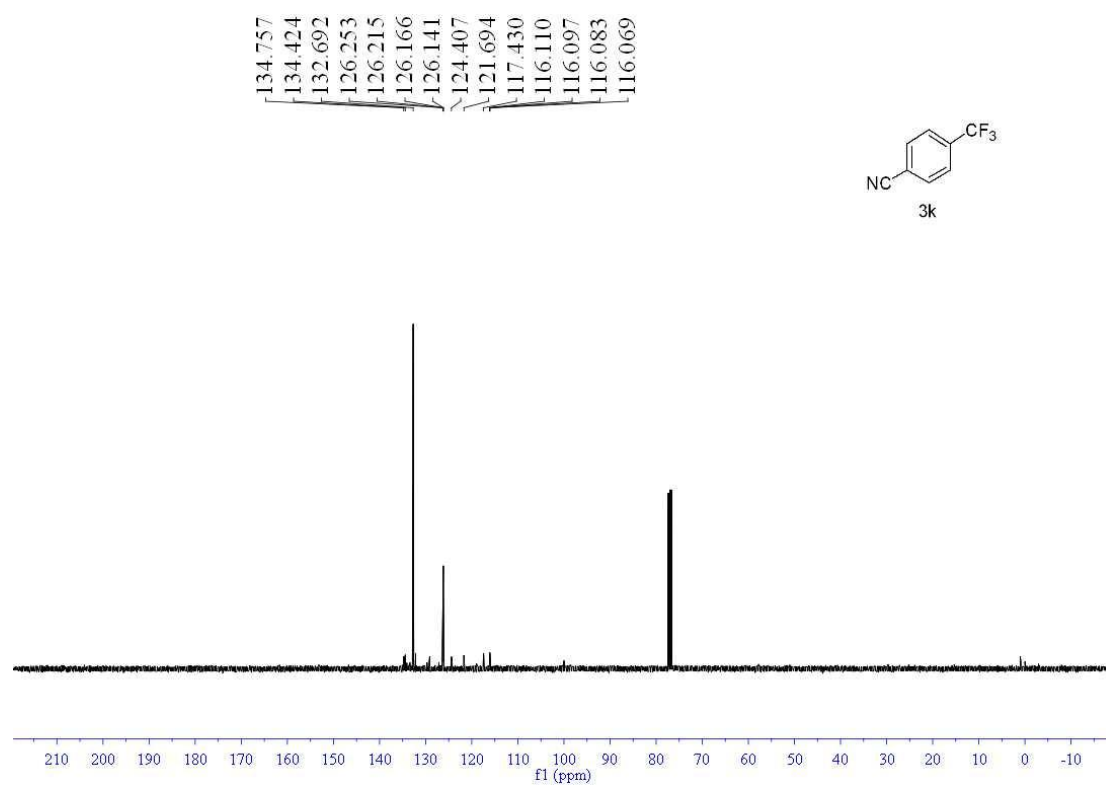

$^{19}\text{F}$  NMR spectrum of **3k** (unlocked)

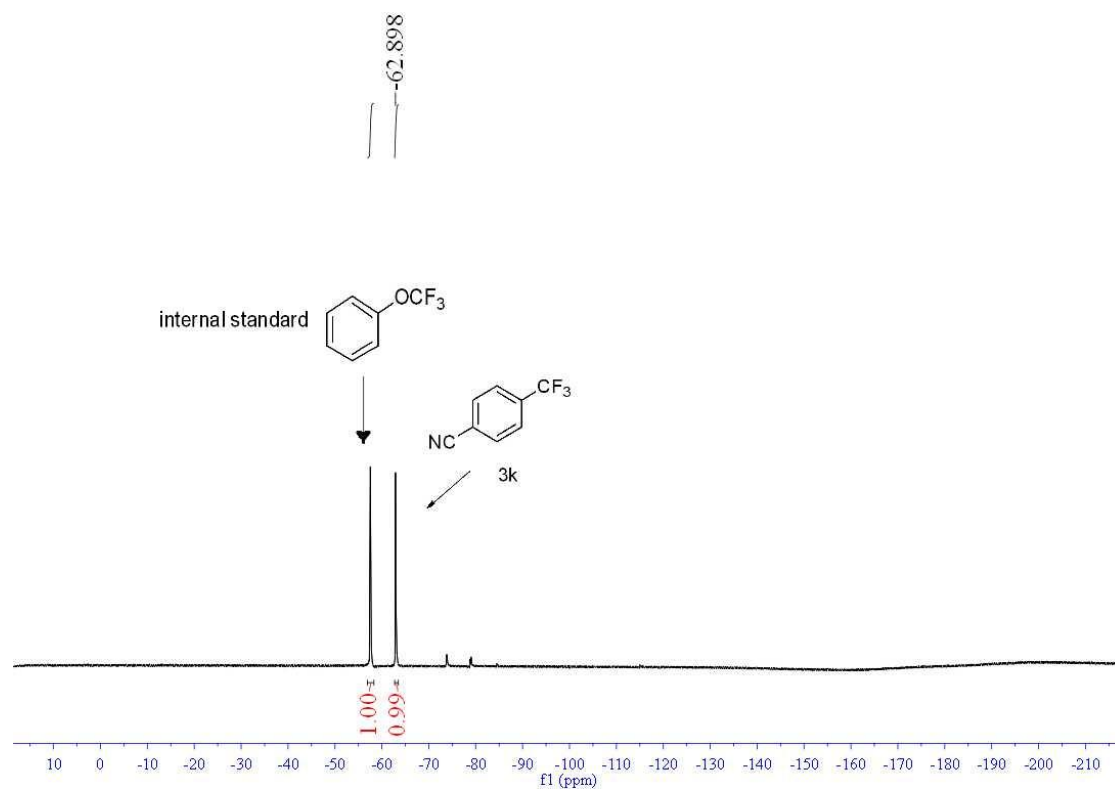

$^1\text{H}$  NMR spectrum of **3l** in  $\text{CDCl}_3$

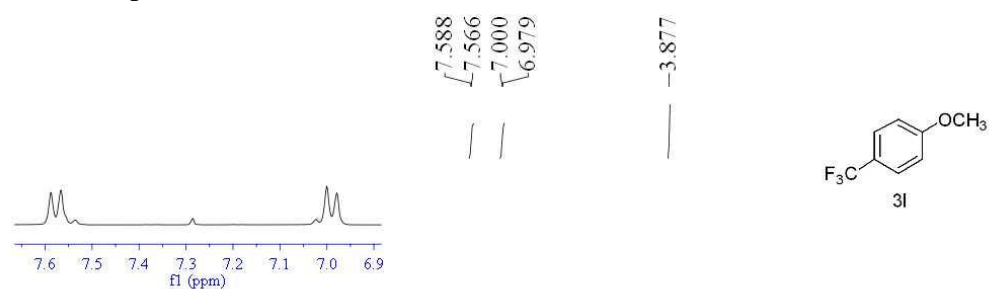

$^{19}\text{F}$  NMR spectrum of **3l** in  $\text{CDCl}_3$

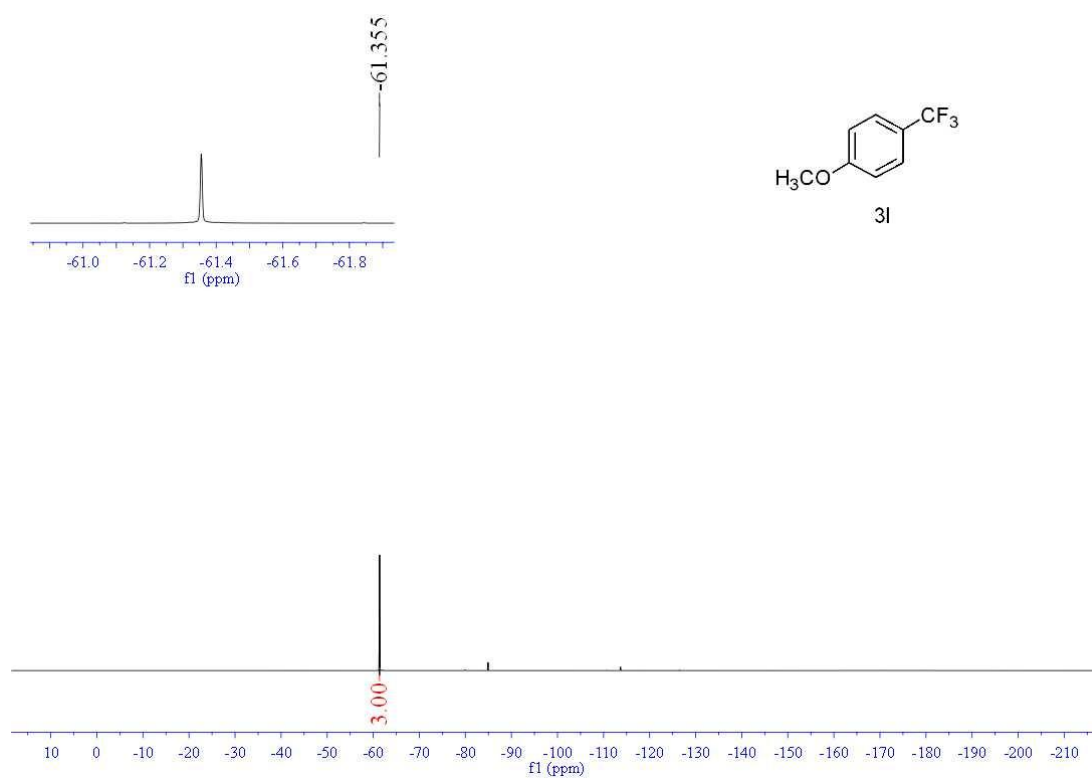

$^{13}\text{C}$  NMR spectrum of **3I** in  $\text{CDCl}_3$

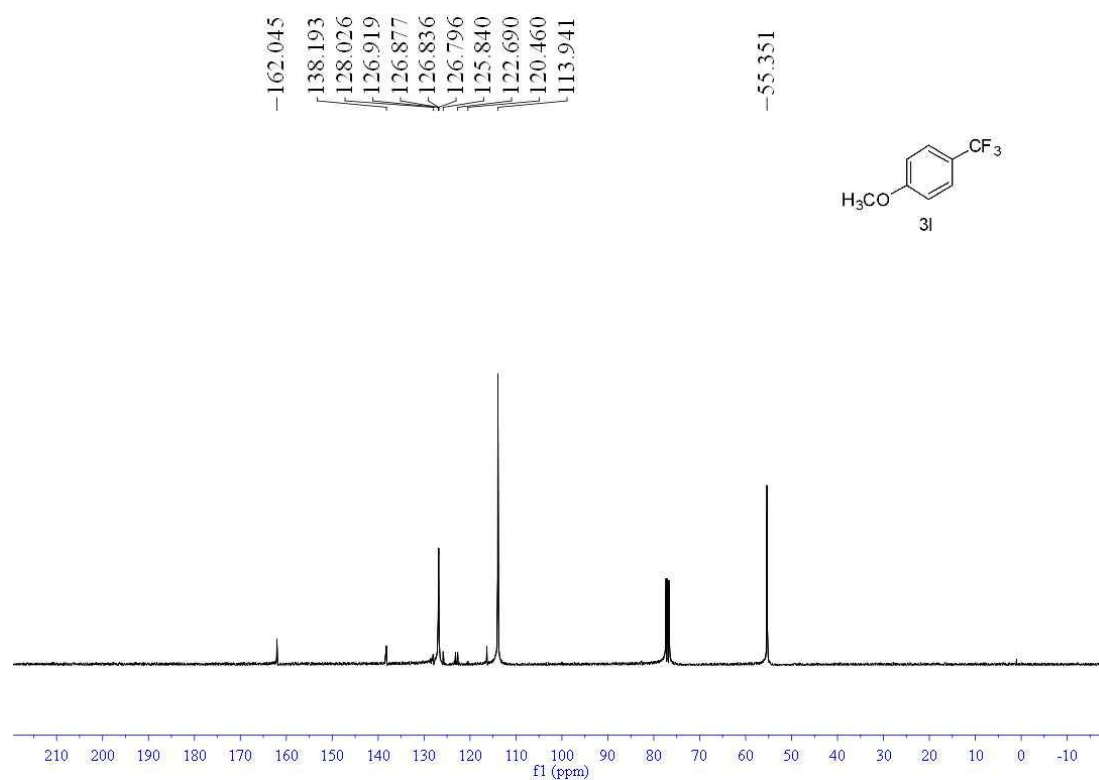

$^{19}\text{F}$  NMR spectrum of **3I** (unlocked)

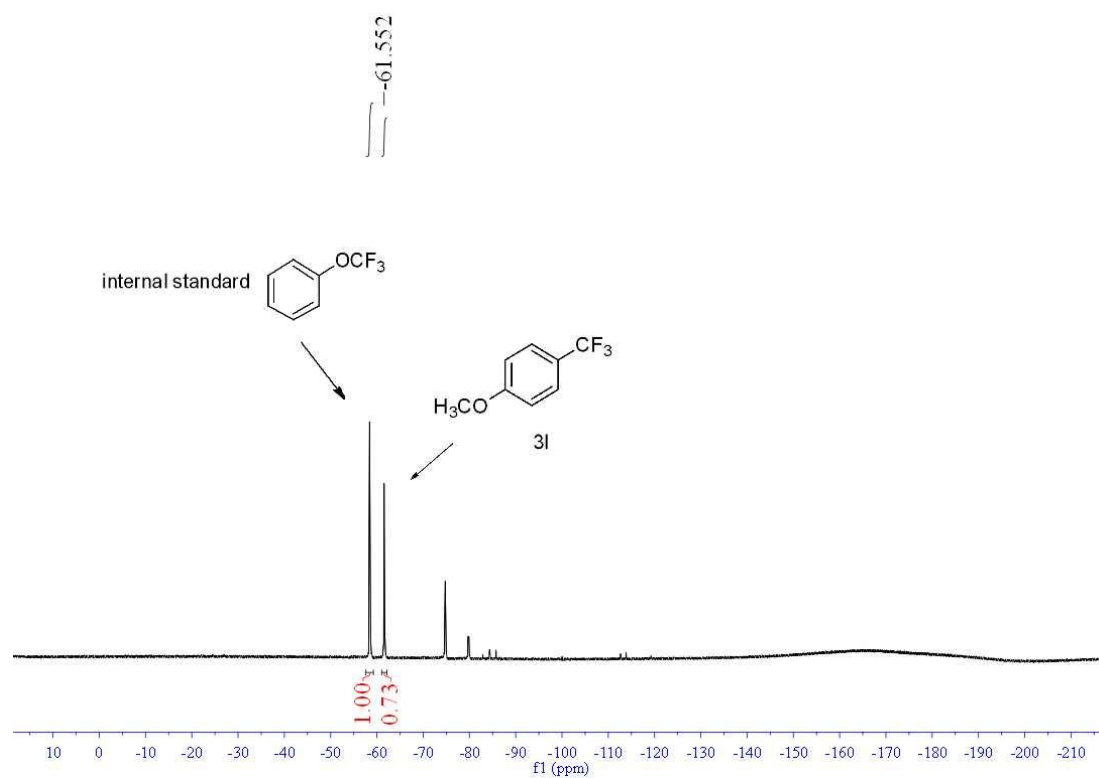

$^1\text{H}$  NMR spectrum of **3m** in  $\text{CDCl}_3$

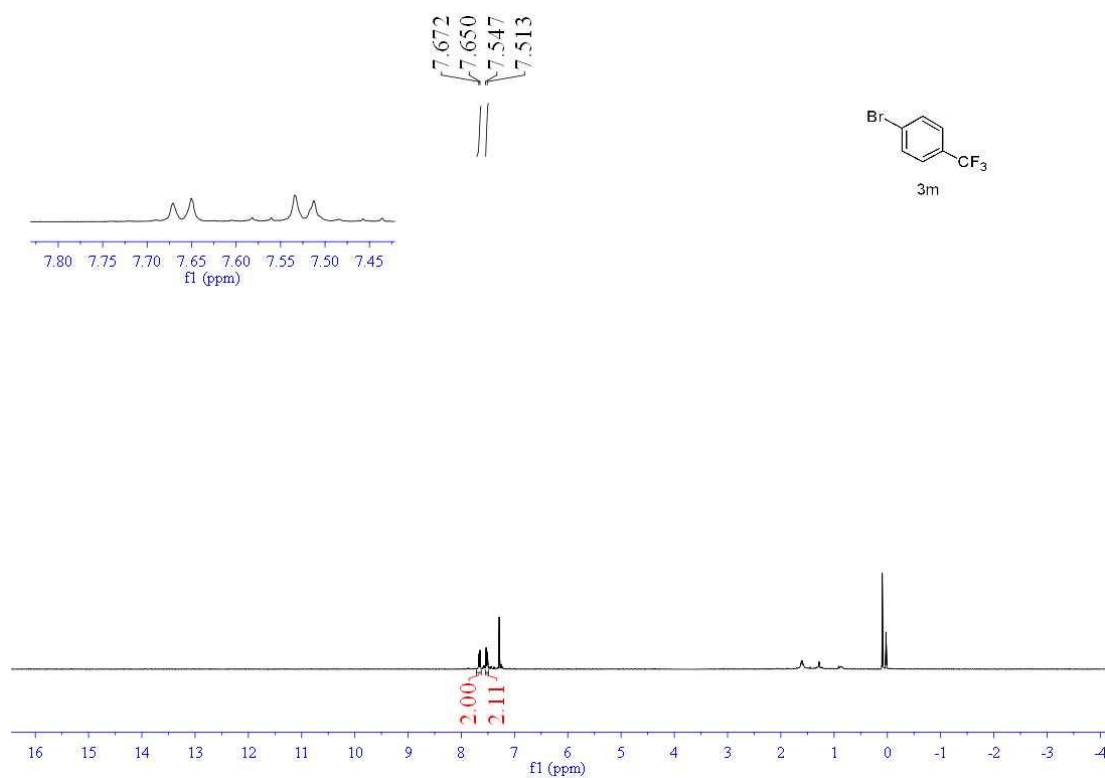

$^{19}\text{F}$  NMR spectrum of **3m** in  $\text{CDCl}_3$

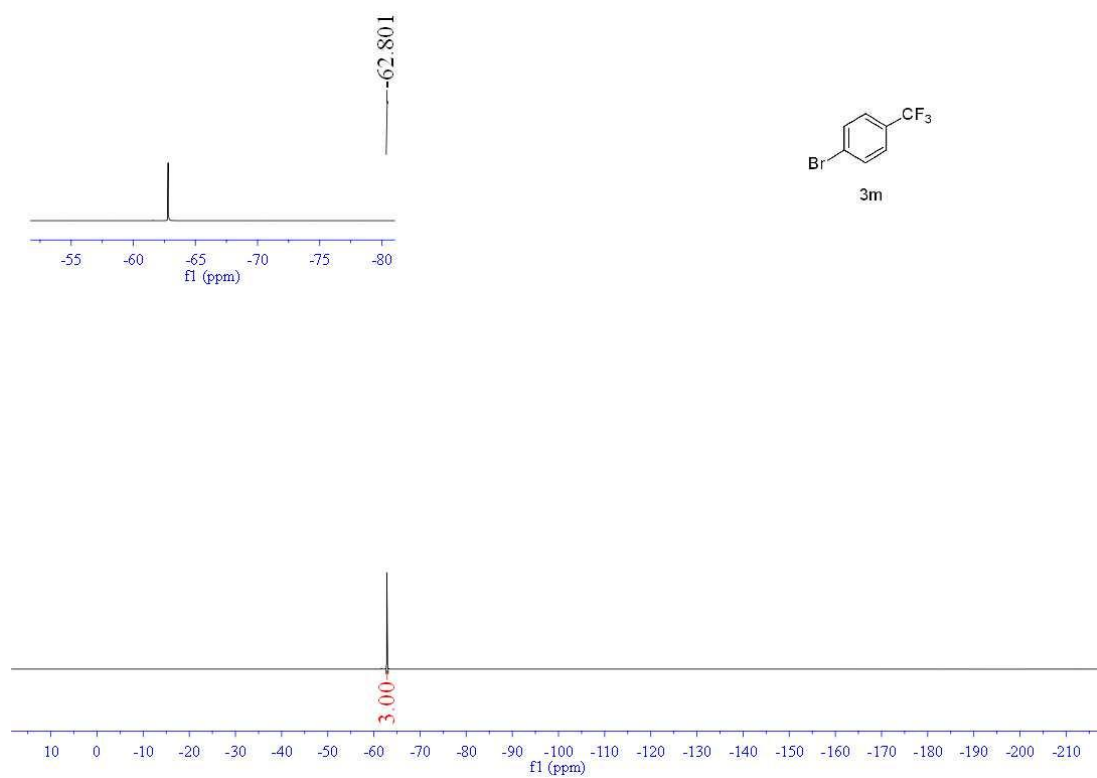

$^{13}\text{C}$  NMR spectrum of **3m** in  $\text{CDCl}_3$

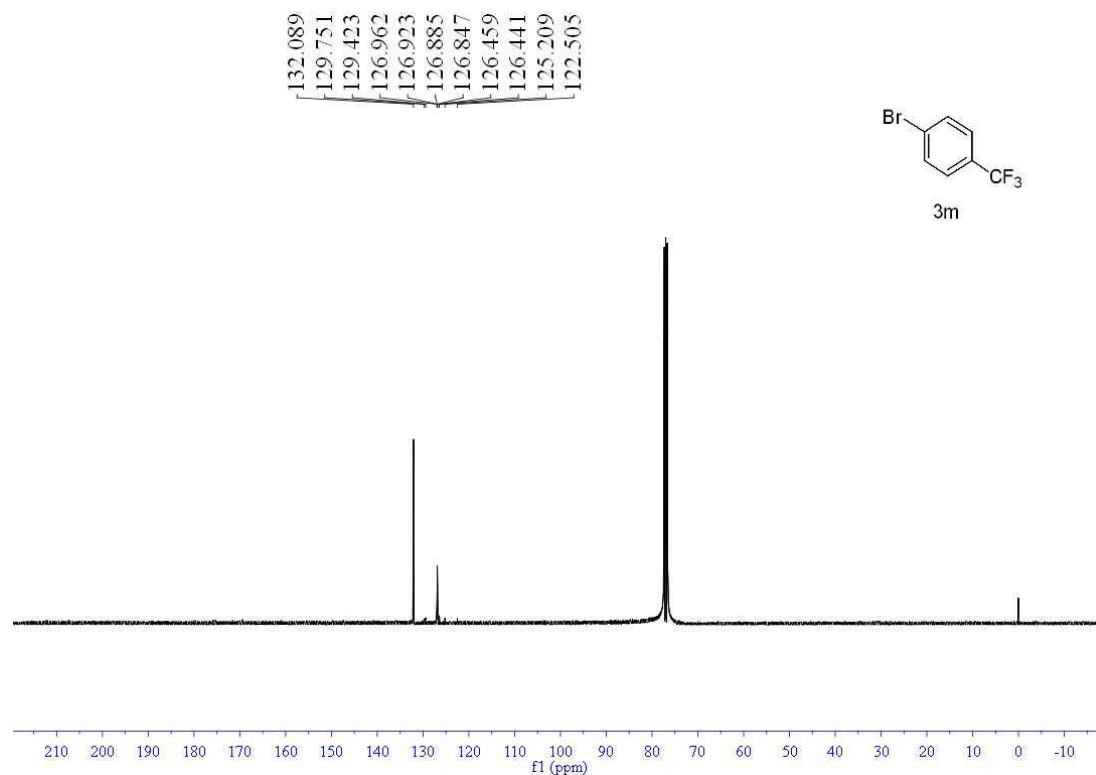

$^{19}\text{F}$  NMR spectrum of **3m** (unlocked)

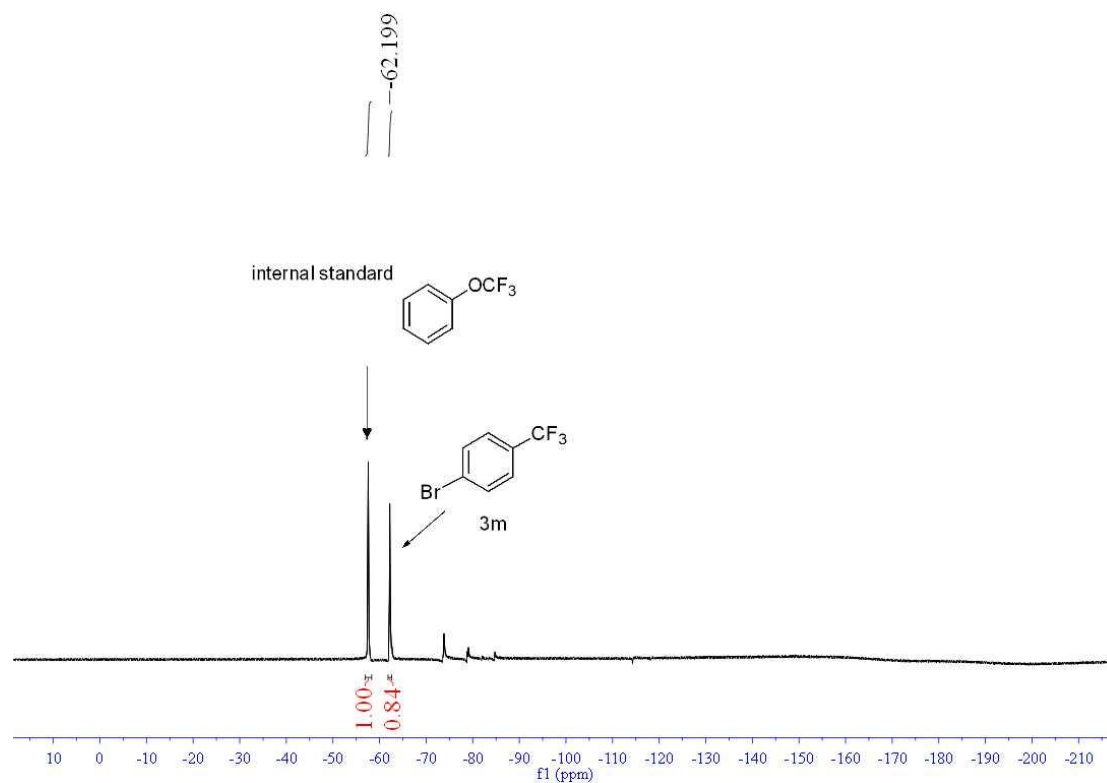

$^1\text{H}$  NMR spectrum of **3n** in  $\text{CDCl}_3$

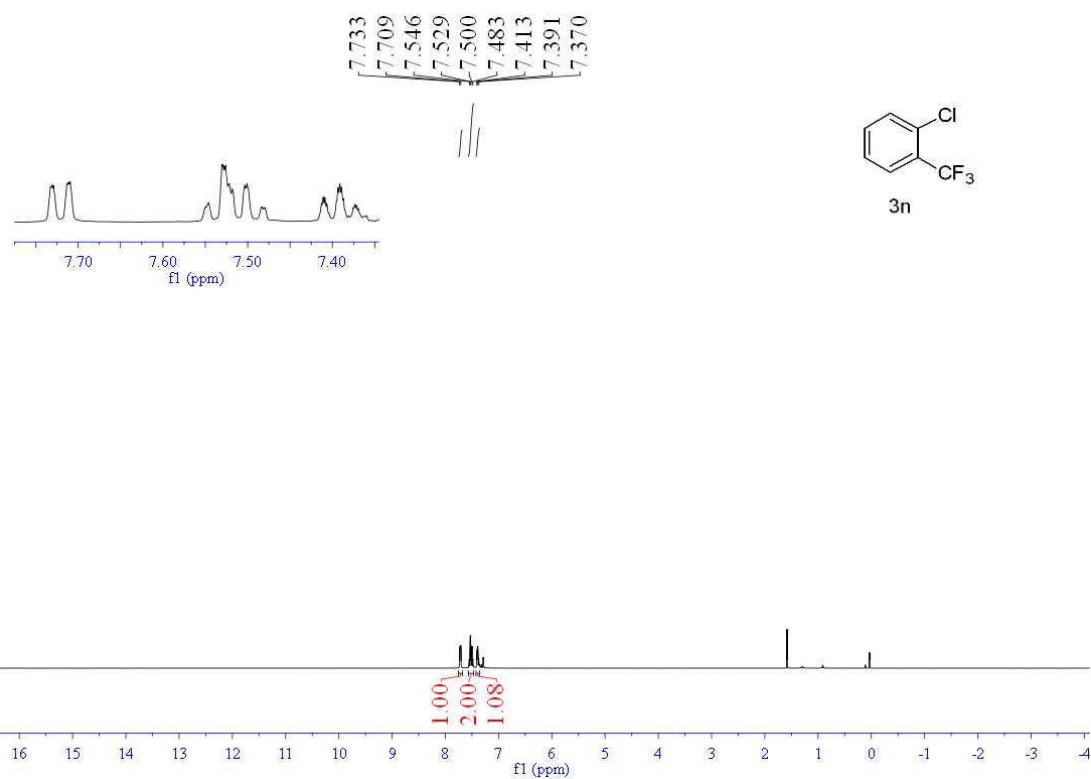

$^{19}\text{F}$  NMR spectrum of **3n** in  $\text{CDCl}_3$

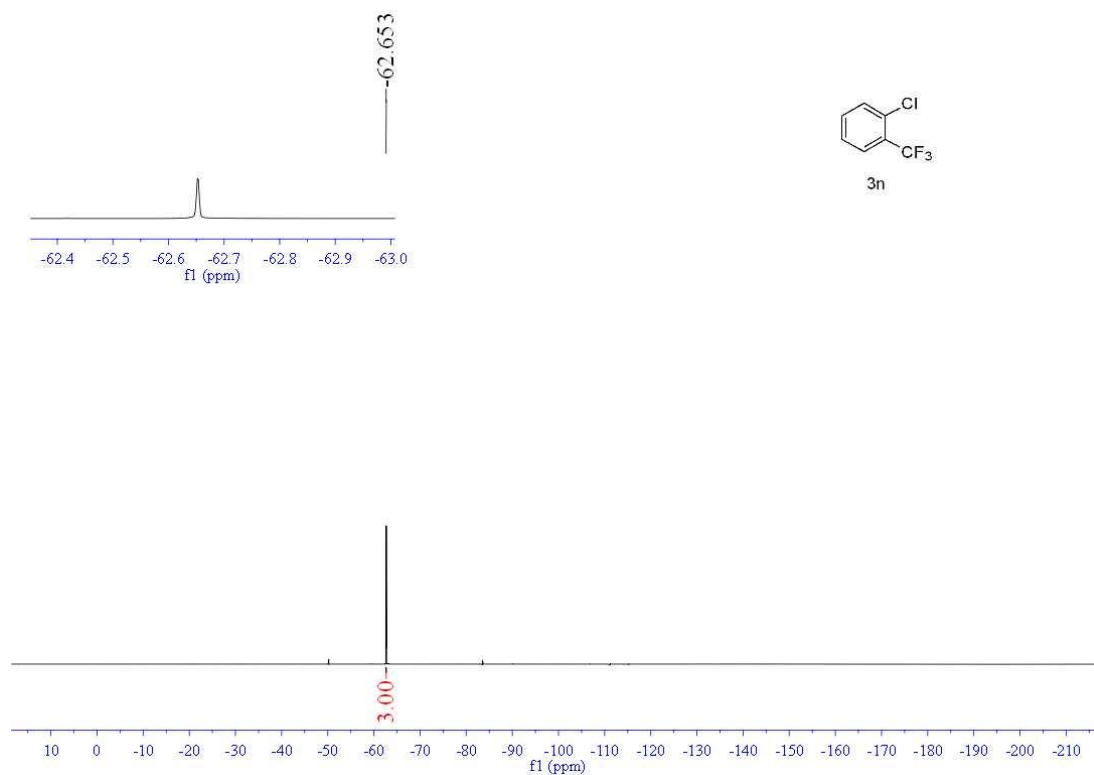

$^{13}\text{C}$  NMR spectrum of **3n** in  $\text{CDCl}_3$

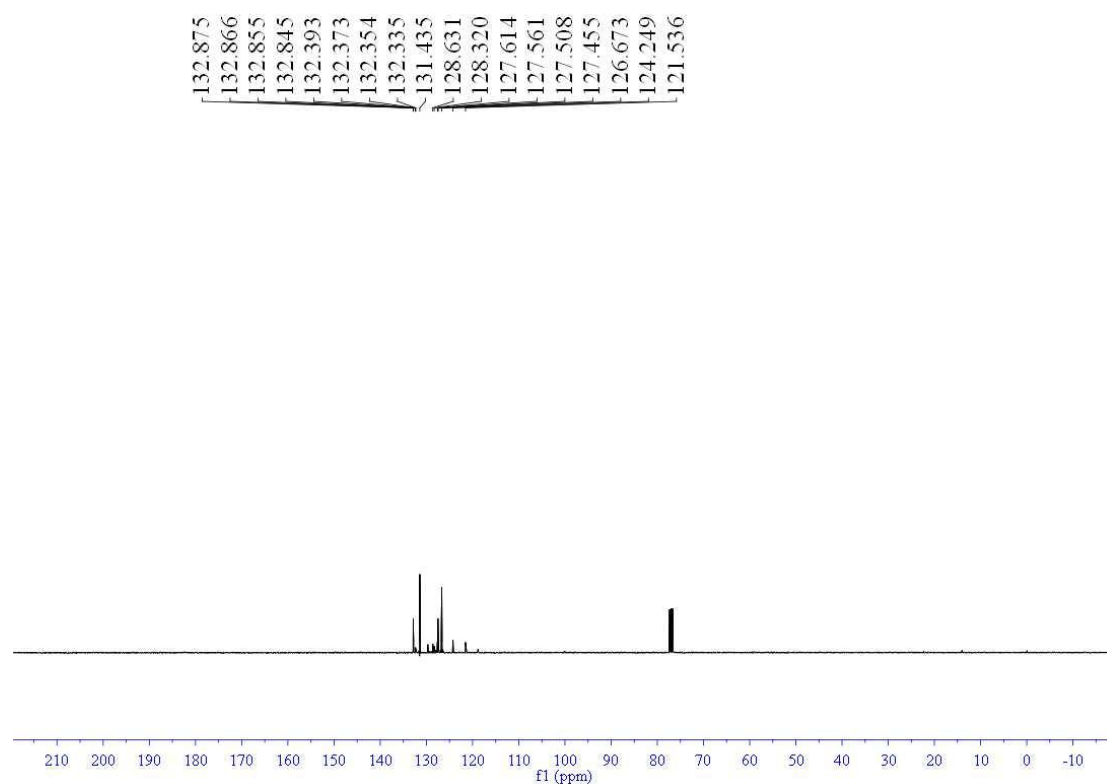

$^{19}\text{F}$  NMR spectrum of **3n** (unlocked)

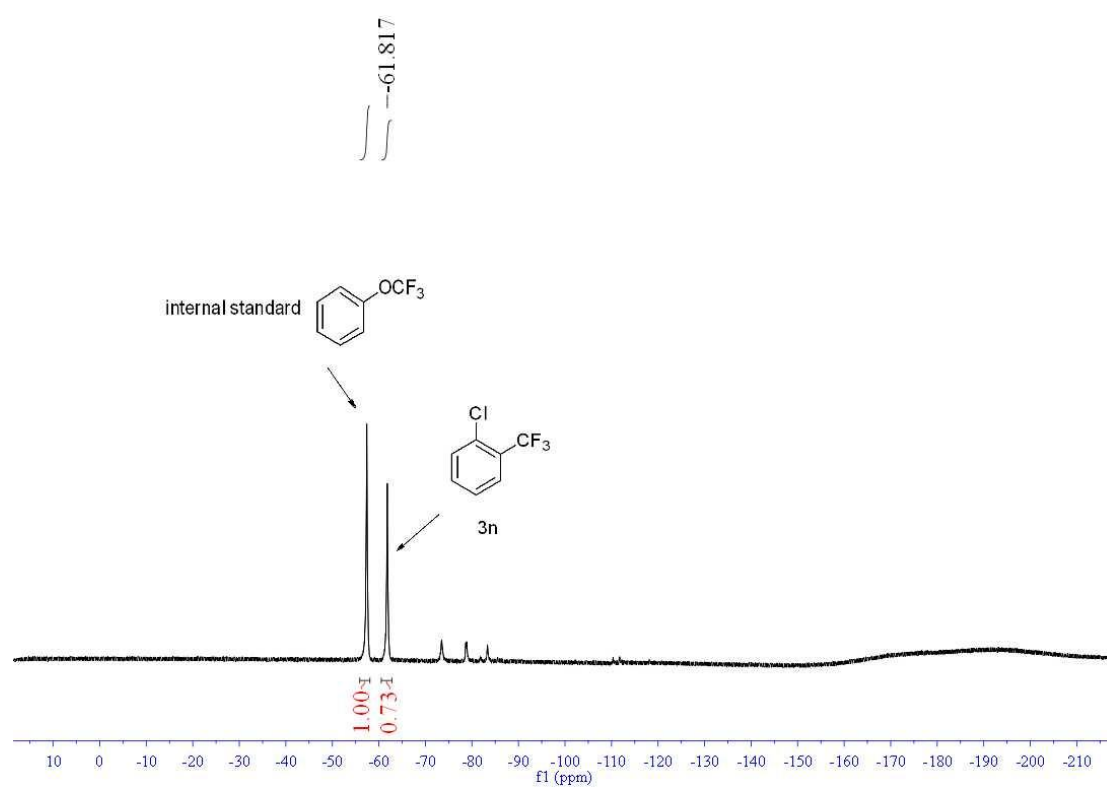

$^1\text{H}$  NMR spectrum of **3o** in  $\text{CDCl}_3$

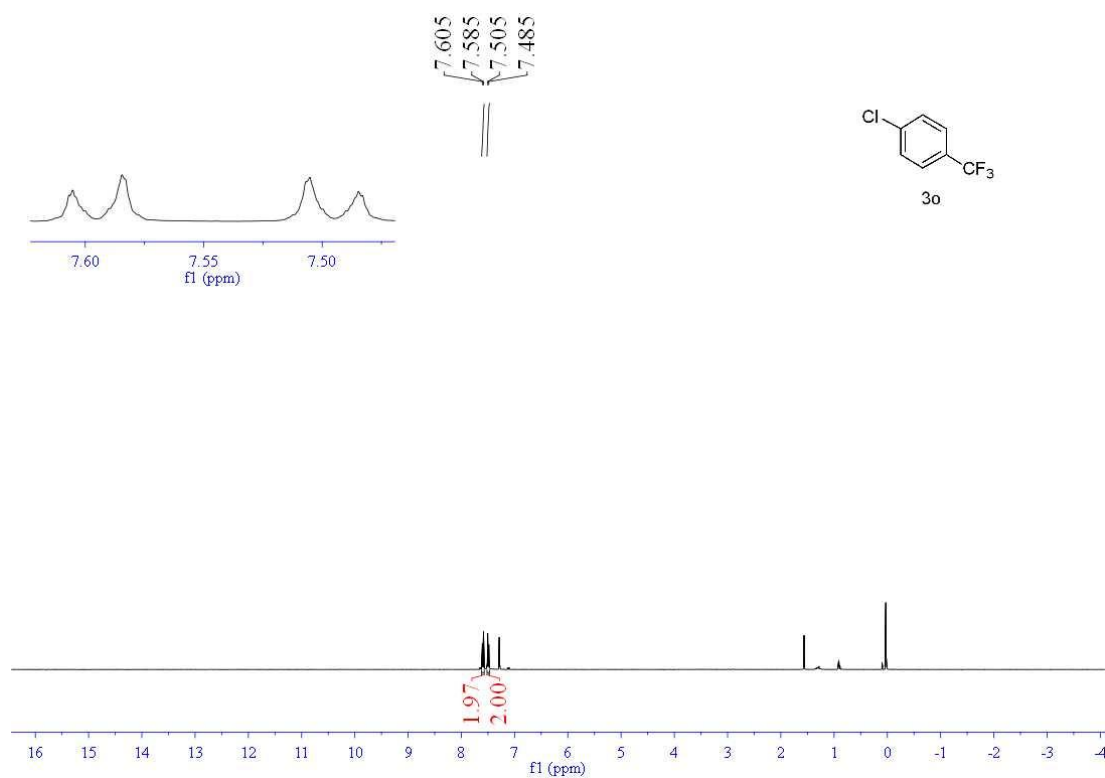

$^{19}\text{F}$  NMR spectrum of **3o** in  $\text{CDCl}_3$

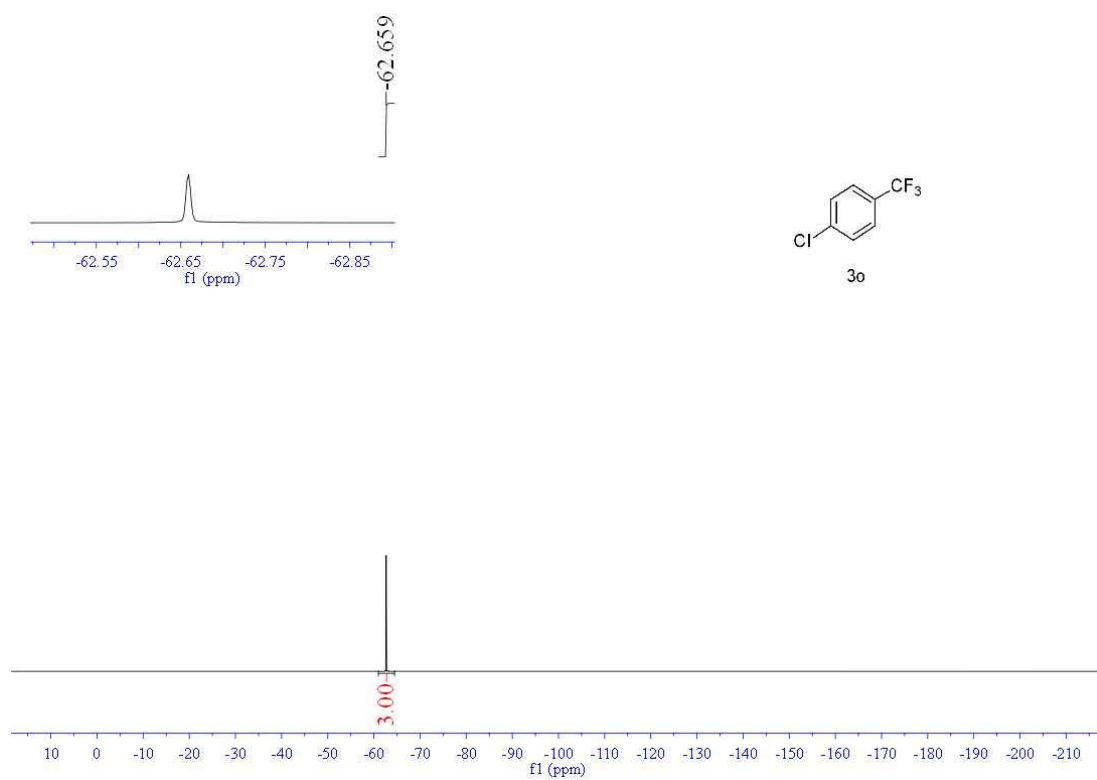

$^{13}\text{C}$  NMR spectrum of **3o** in  $\text{CDCl}_3$

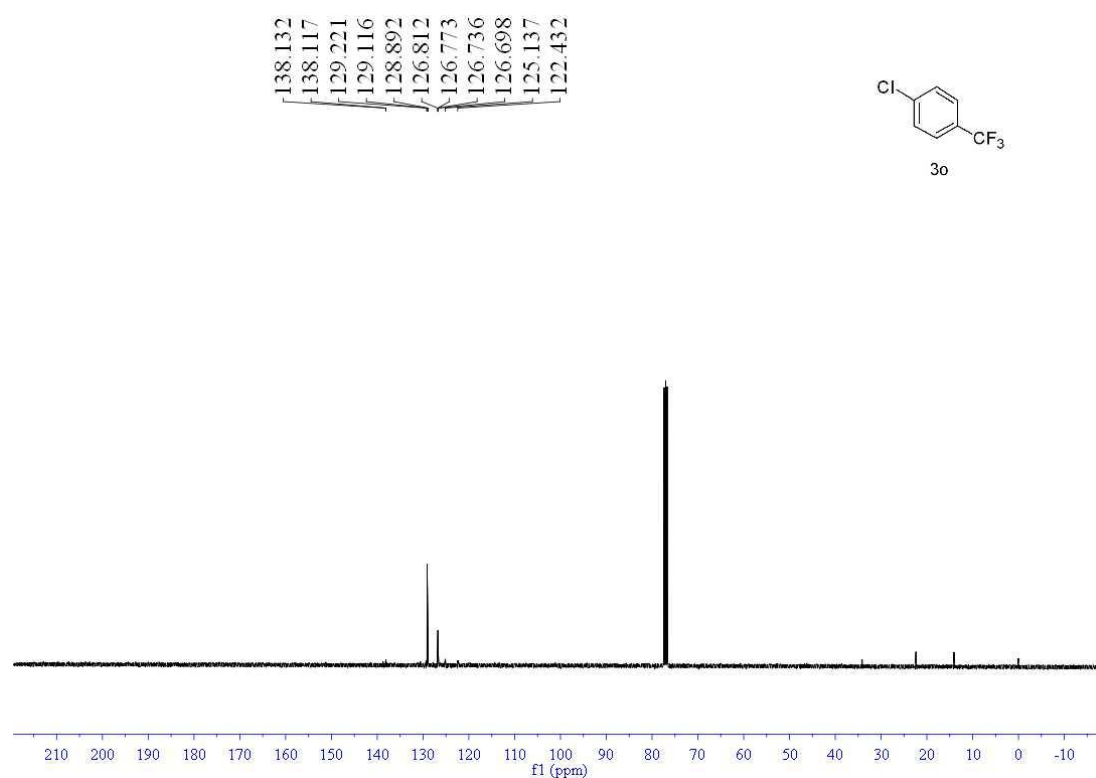

$^{19}\text{F}$  NMR spectrum of **3o** (unlocked)

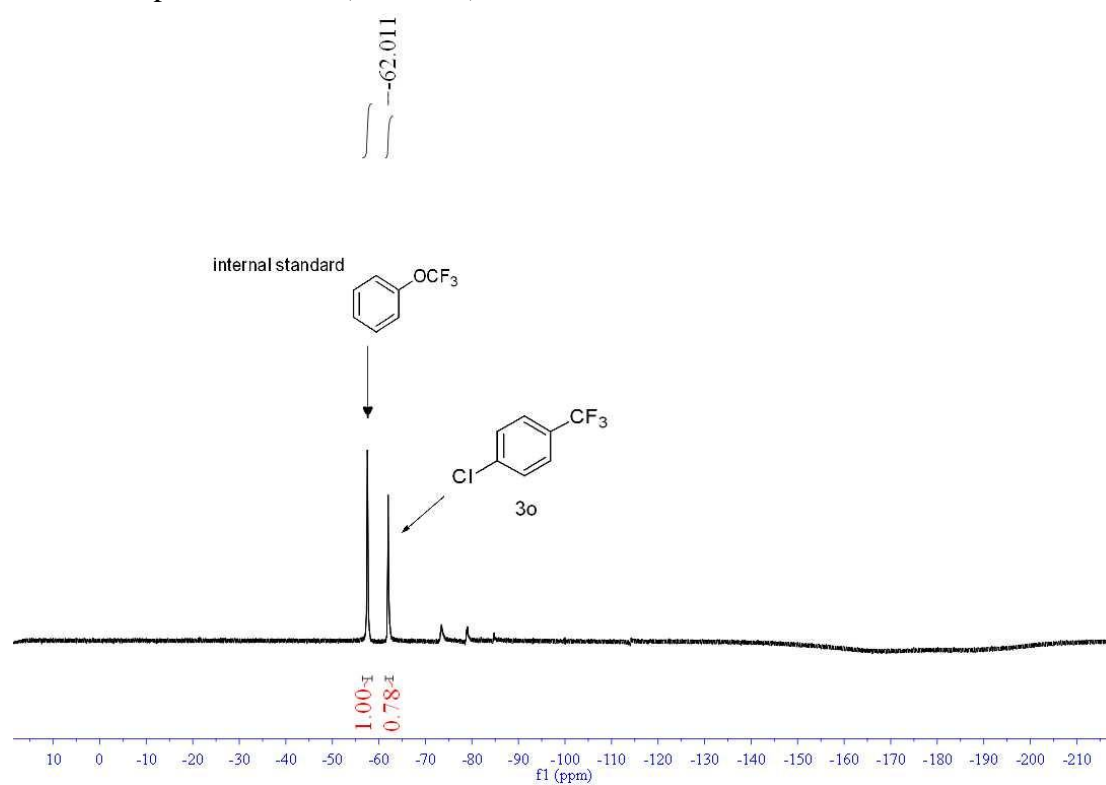

$^1\text{H}$  NMR spectrum of **3p** in  $\text{CDCl}_3$

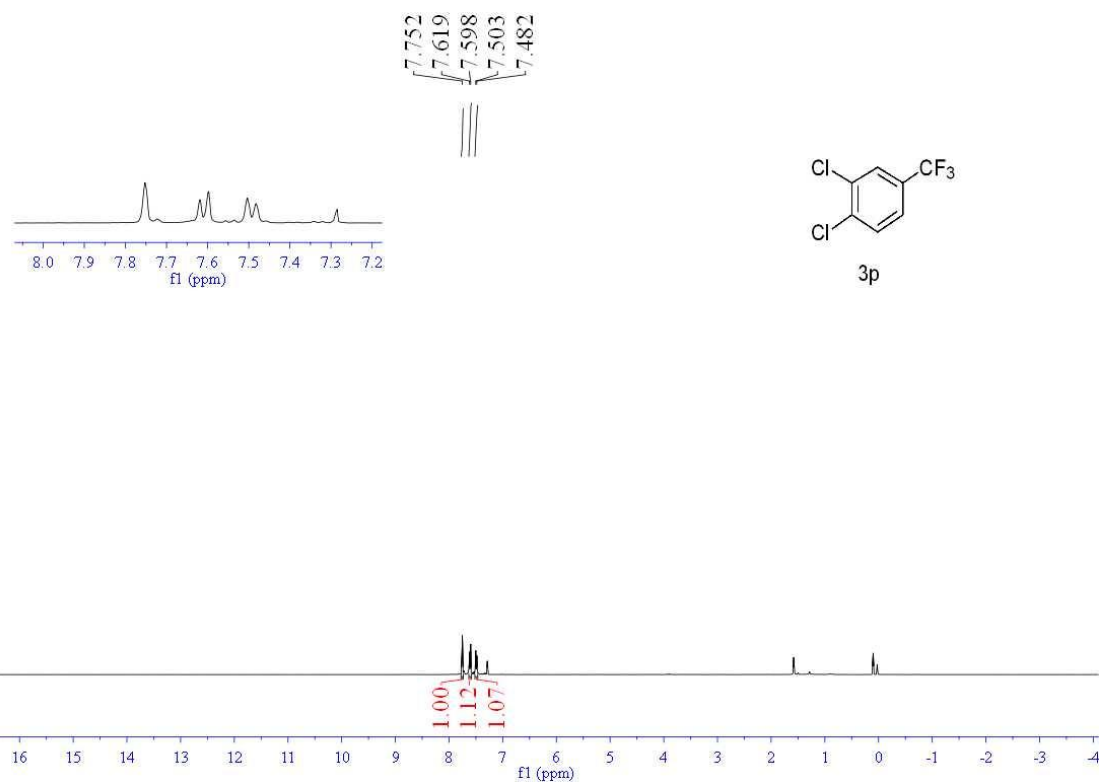

$^{19}\text{F}$  NMR spectrum of **3p** in  $\text{CDCl}_3$

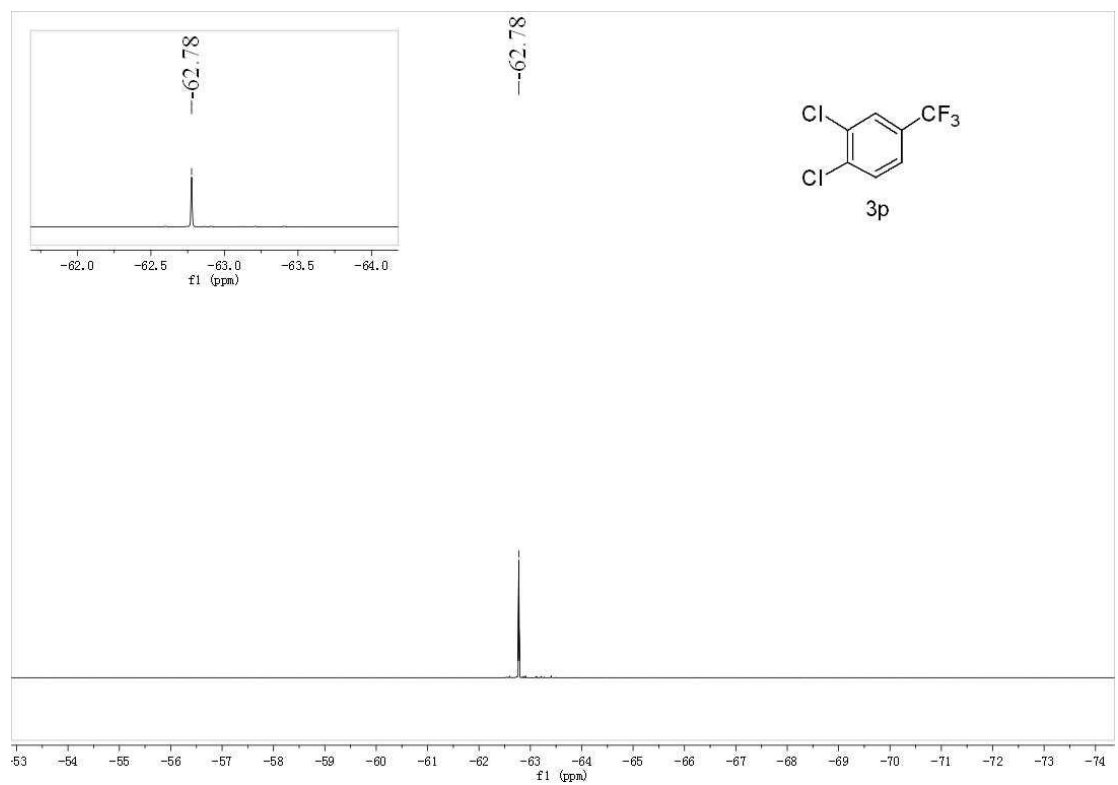

$^{13}\text{C}$  NMR spectrum of **3p** in  $\text{CDCl}_3$

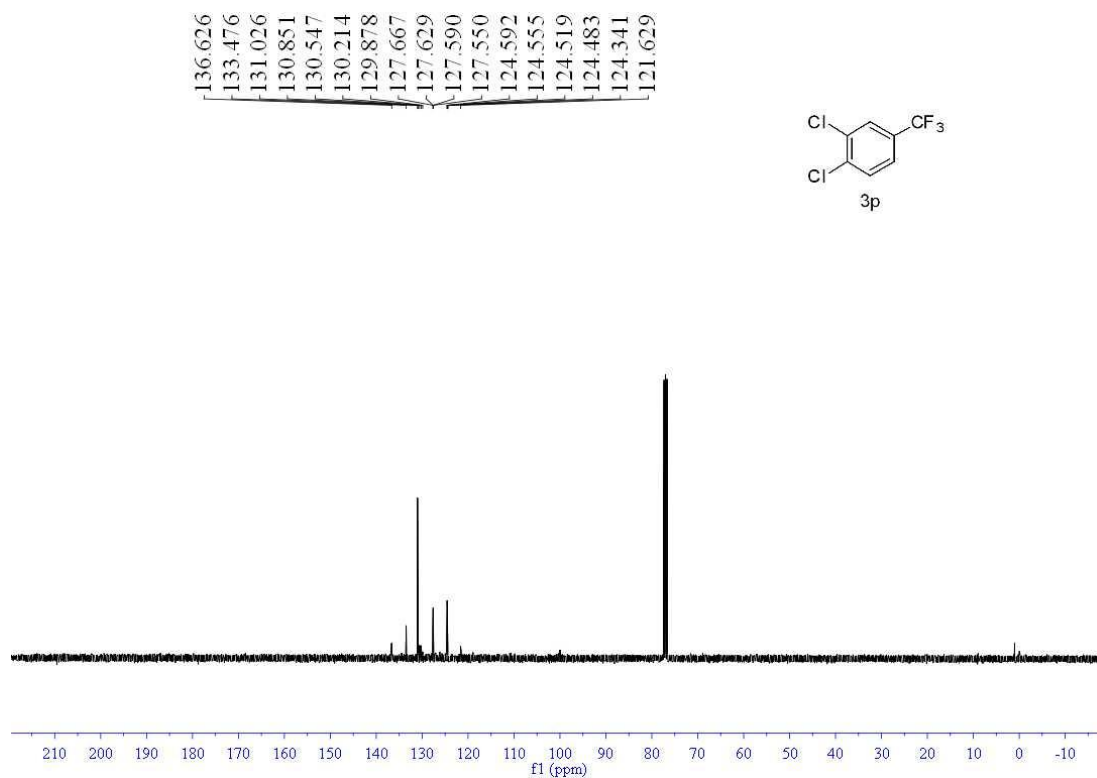

$^{19}\text{F}$  NMR spectrum of **3p** (unlocked)

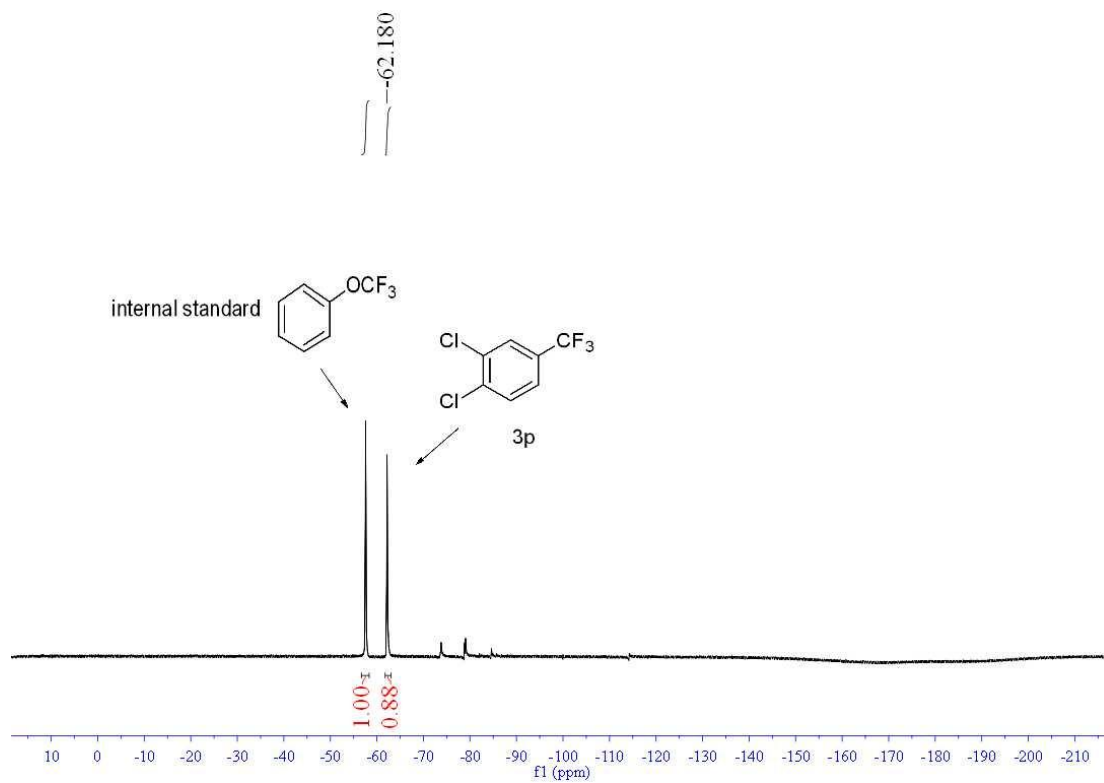

$^1\text{H}$  NMR spectrum of **3q** in  $\text{CDCl}_3$

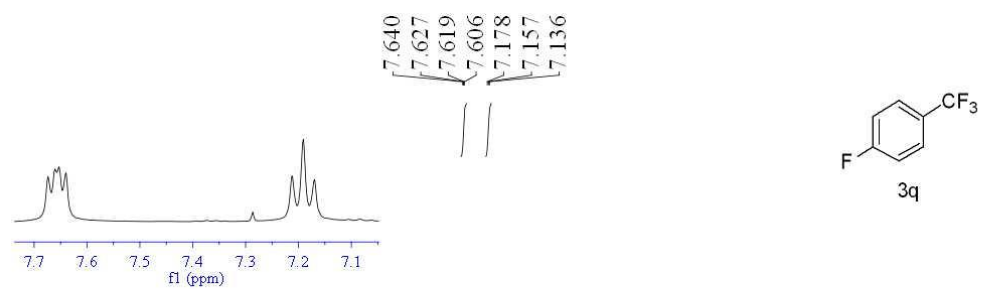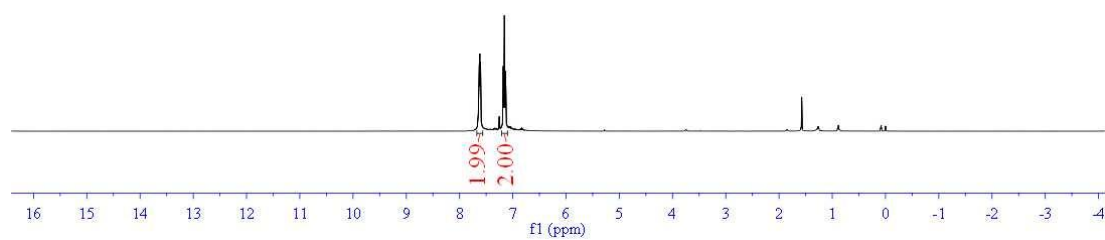

$^{19}\text{F}$  NMR spectrum of **3q** in  $\text{CDCl}_3$

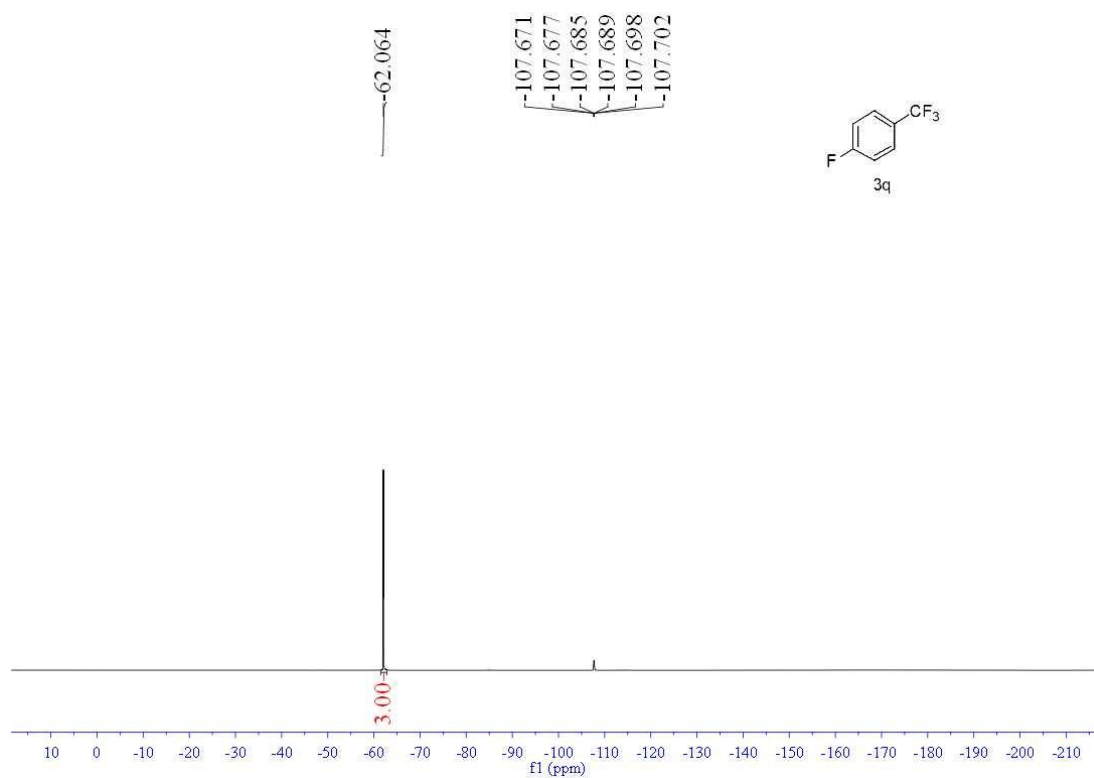

$^{13}\text{C}$  NMR spectrum of **3q** in  $\text{CDCl}_3$

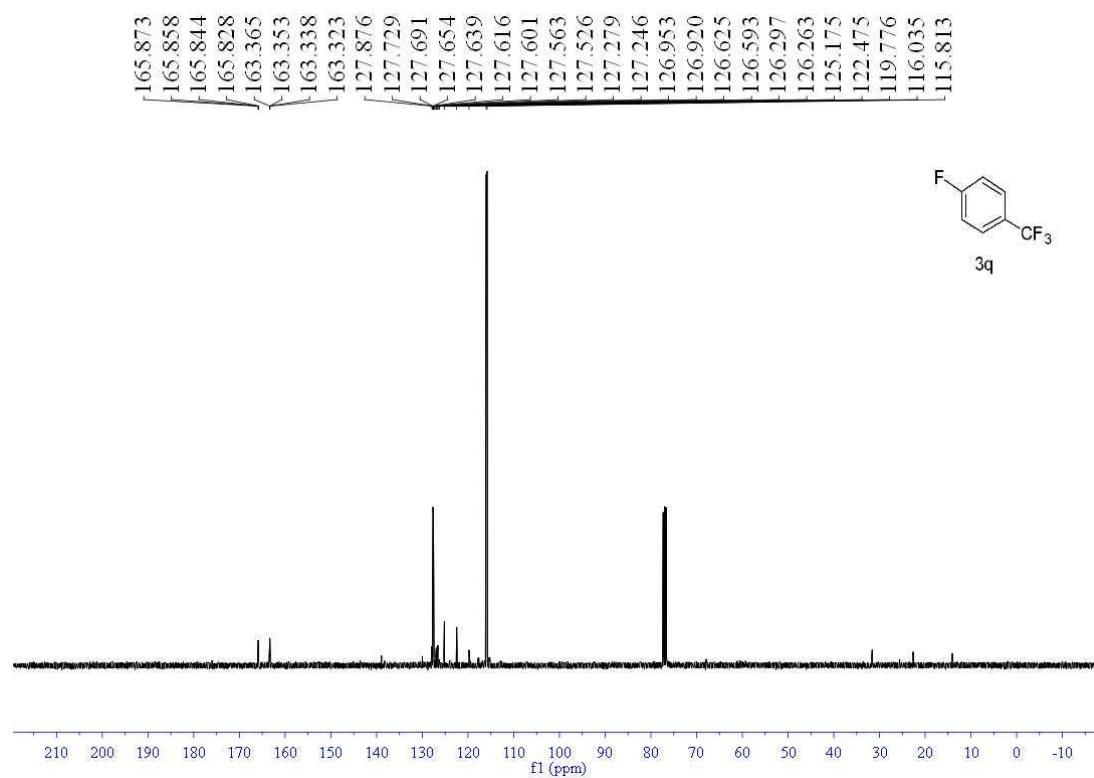

$^{19}\text{F}$  NMR spectrum of **3q** (unlocked)

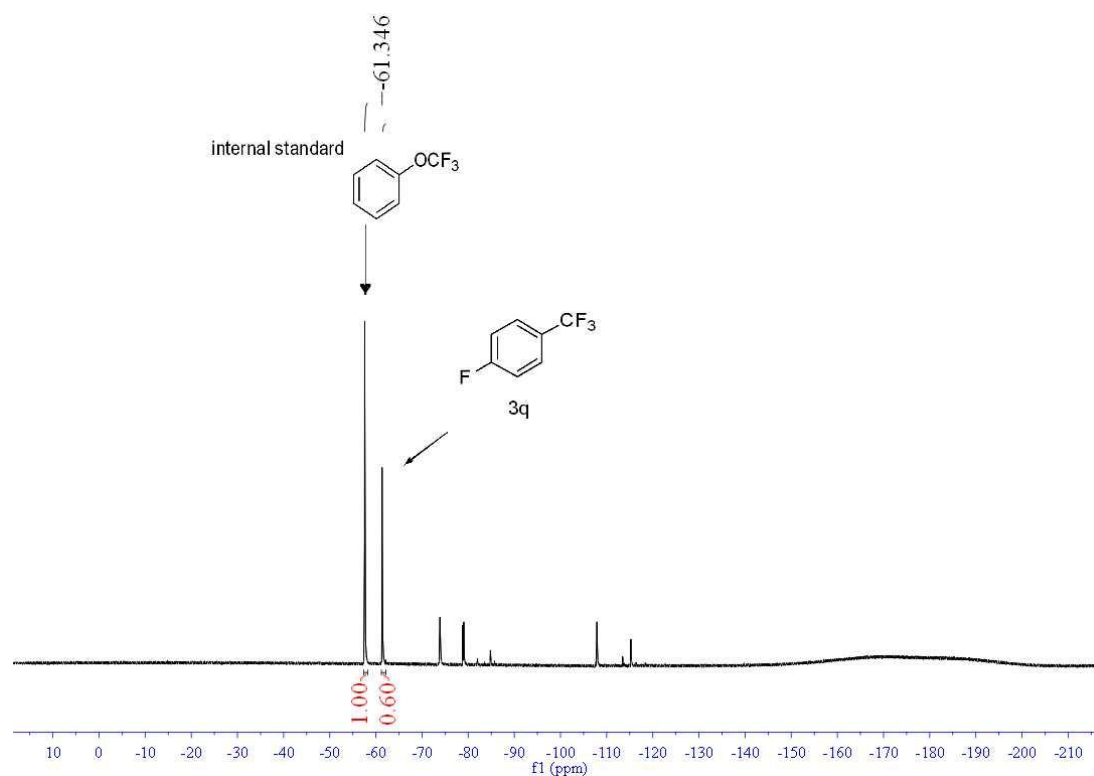

$^1\text{H}$  NMR spectrum of **3r** in  $\text{CDCl}_3$

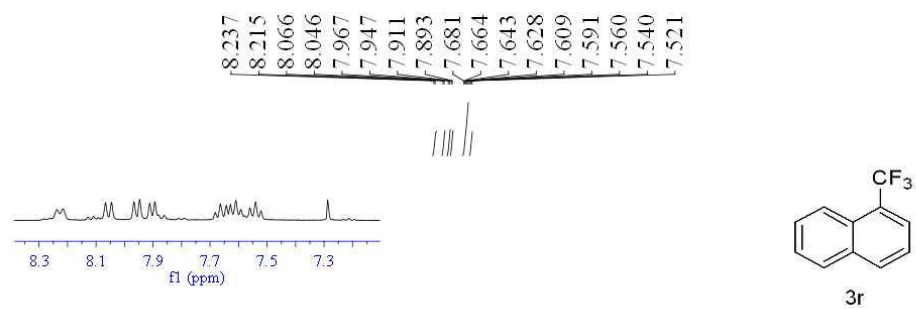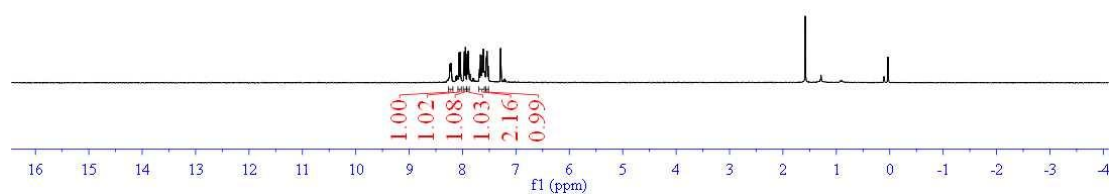

$^{19}\text{F}$  NMR spectrum of **3r** in  $\text{CDCl}_3$

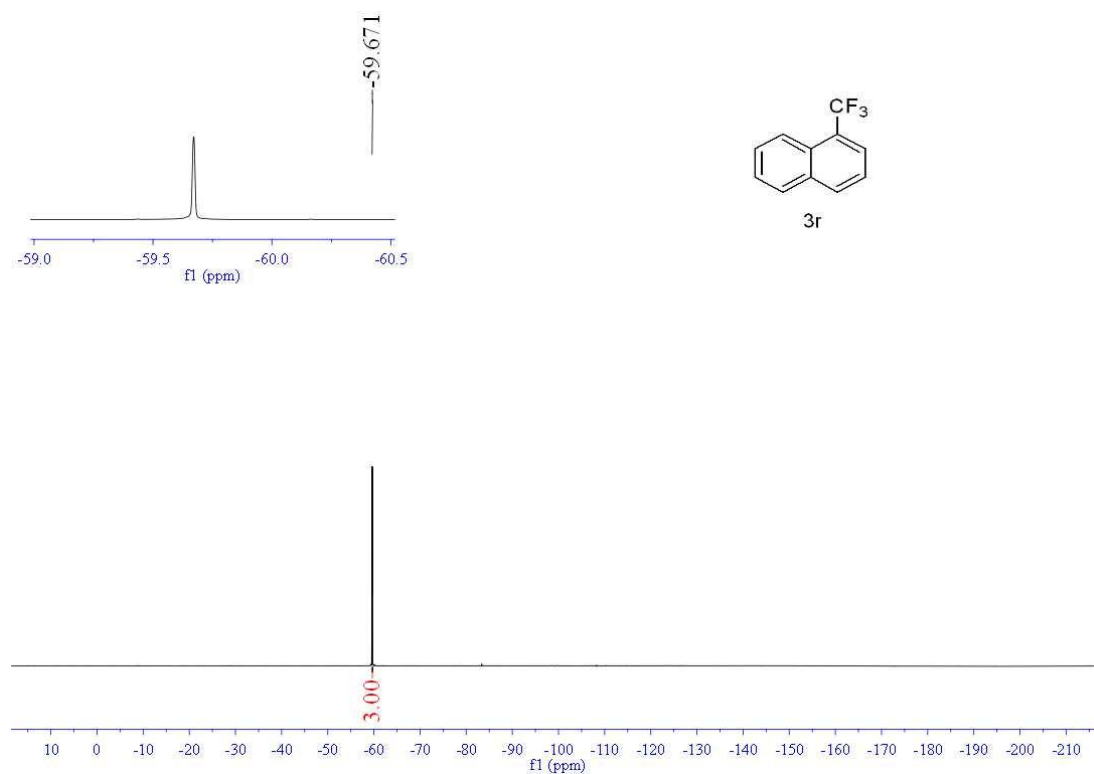

$^{13}\text{C}$  NMR spectrum of **3r** in  $\text{CDCl}_3$

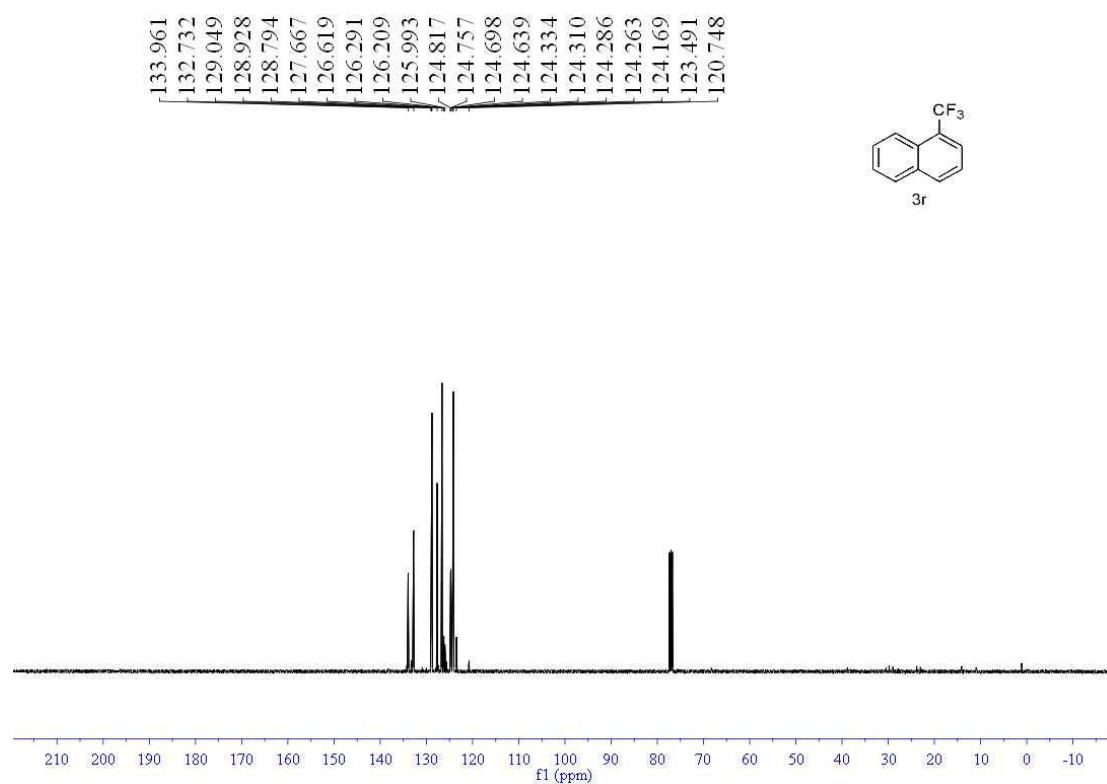

$^{19}\text{F}$  NMR spectrum of **3r** (unlocked)

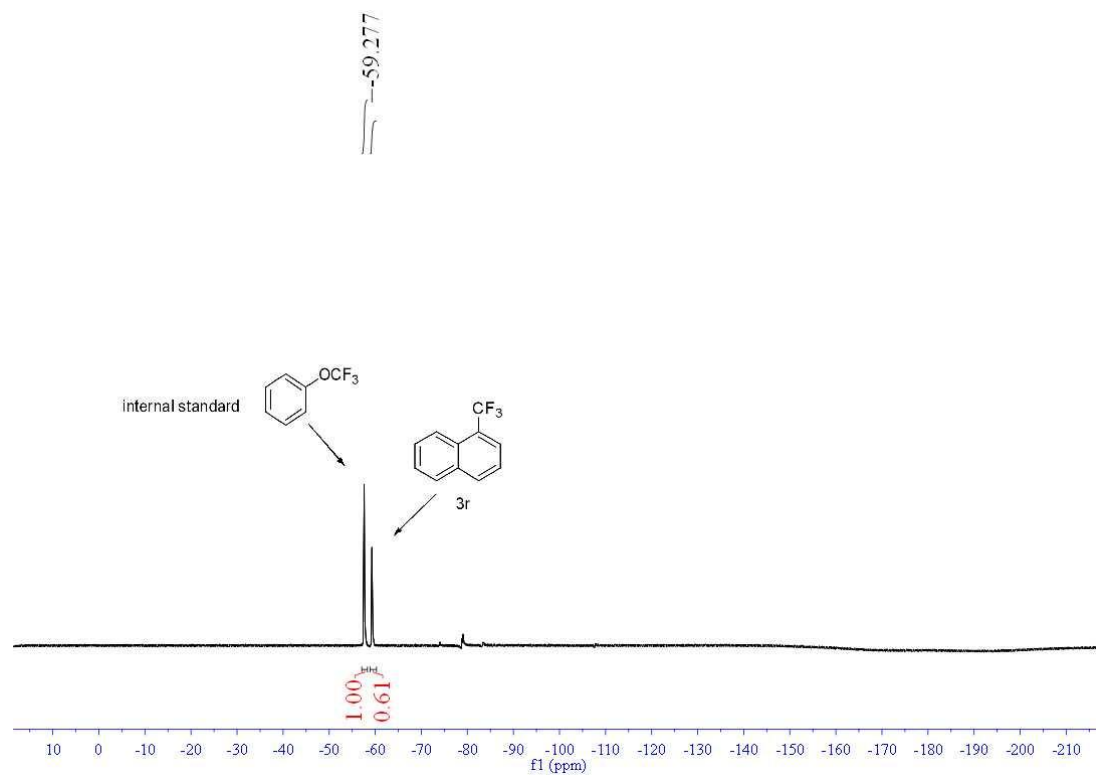

$^1\text{H}$  NMR spectrum of **5a** in  $\text{CDCl}_3$

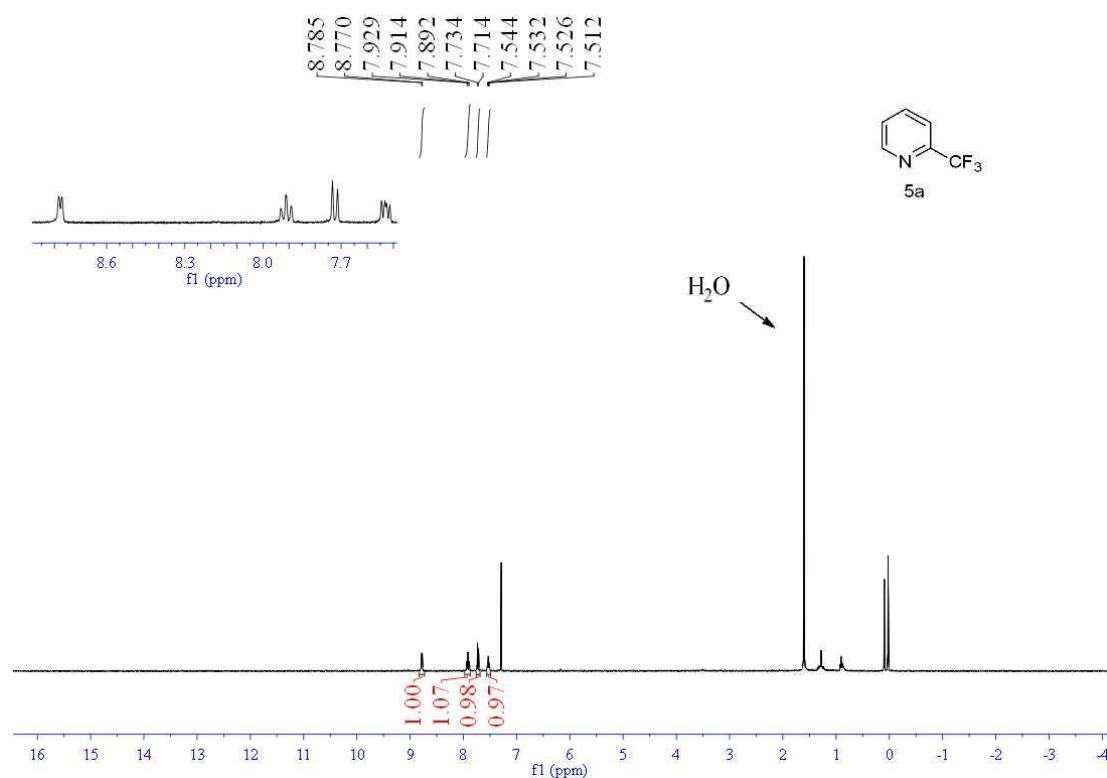

$^{19}\text{F}$  NMR spectrum of **5a** in  $\text{CDCl}_3$

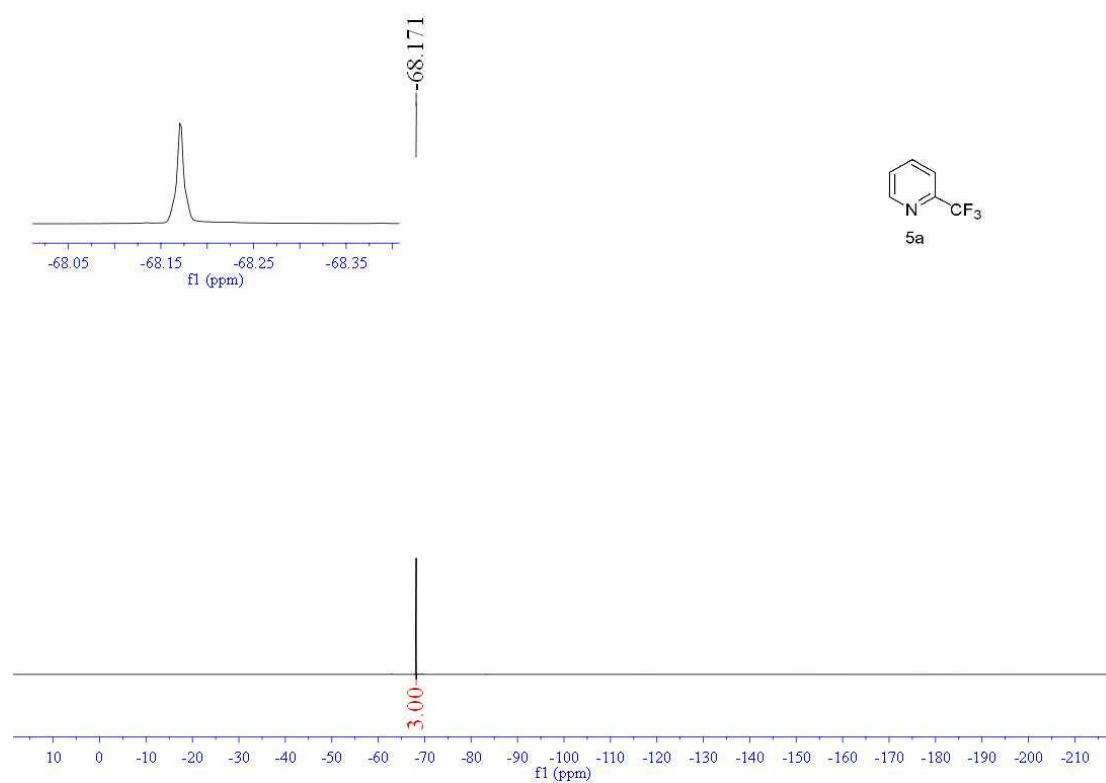

$^{13}\text{C}$  NMR spectrum of **5a** in  $\text{CDCl}_3$

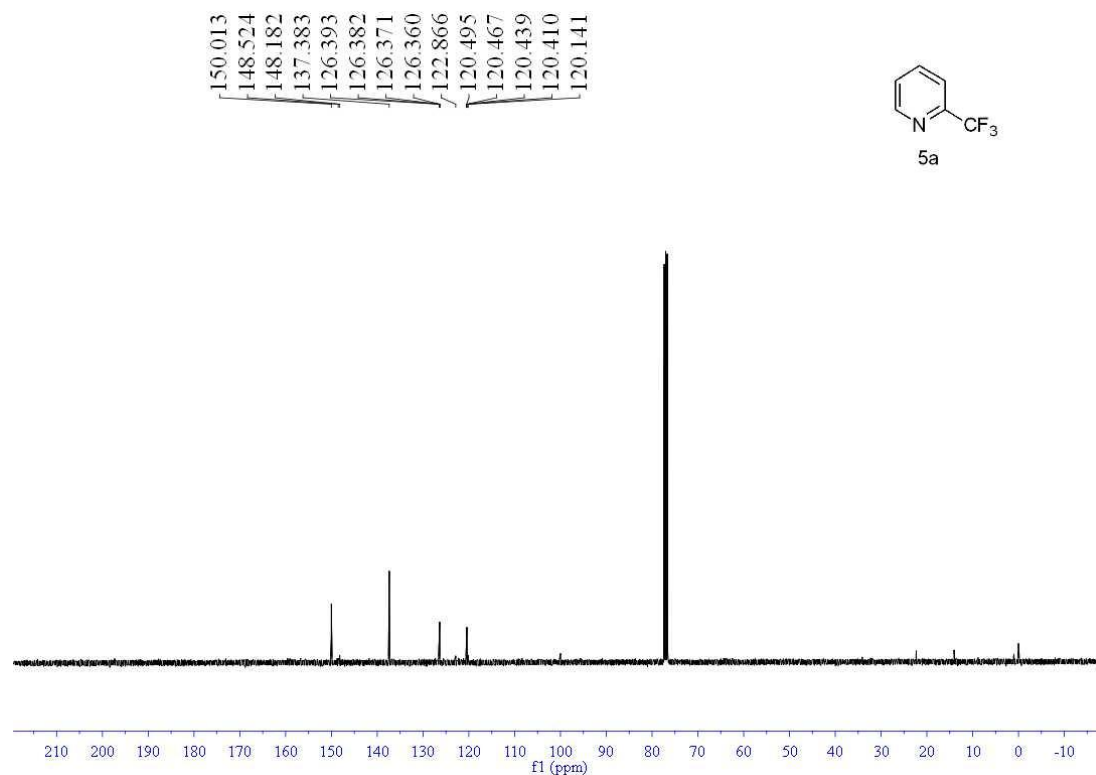

$^{19}\text{F}$  NMR spectrum of **5a** (unlocked)

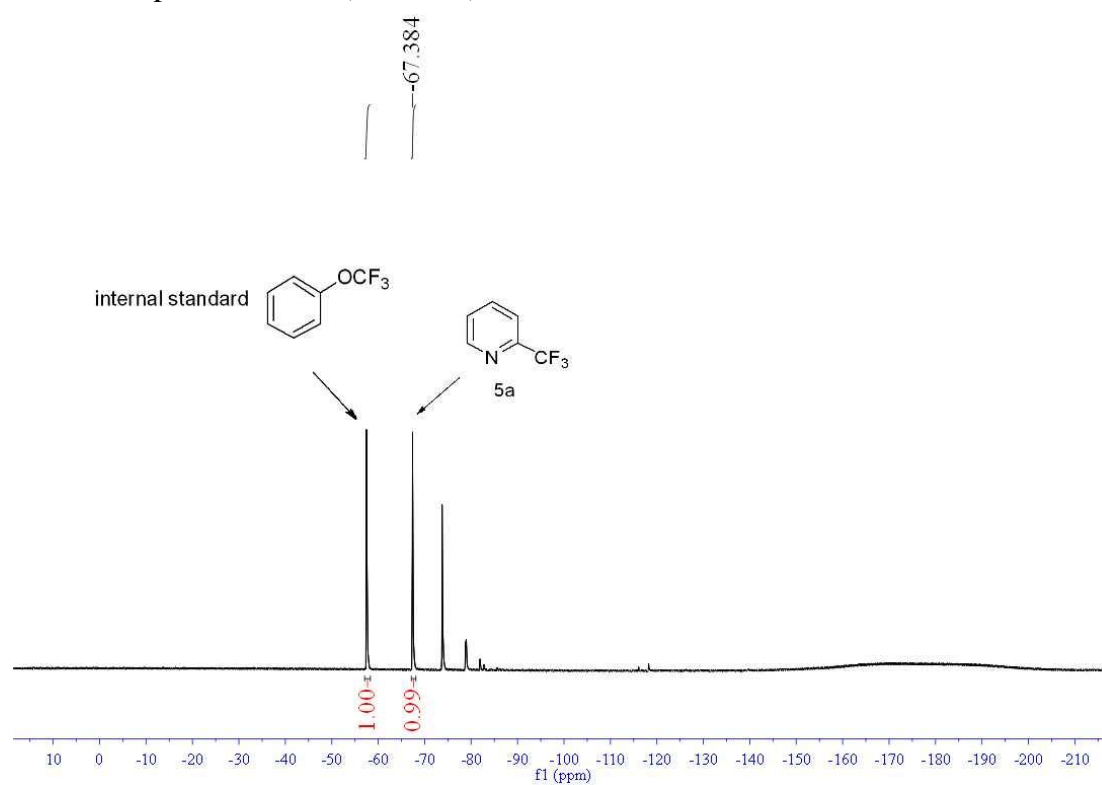

$^1\text{H}$  NMR spectrum of **5b** in  $\text{CDCl}_3$

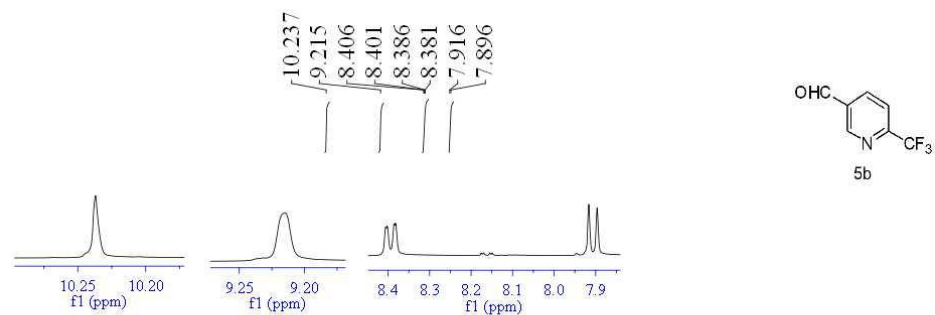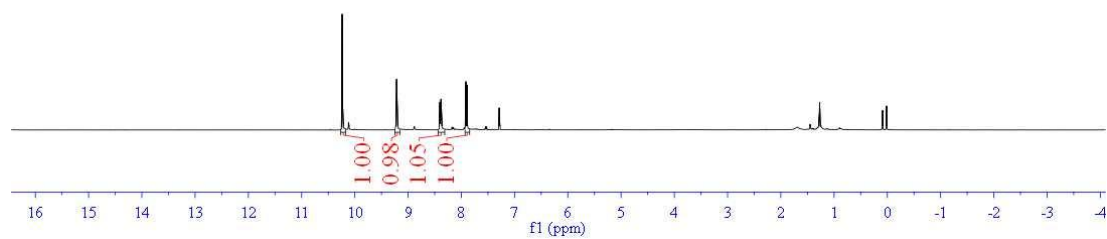

$^{19}\text{F}$  NMR spectrum of **5b** in  $\text{CDCl}_3$

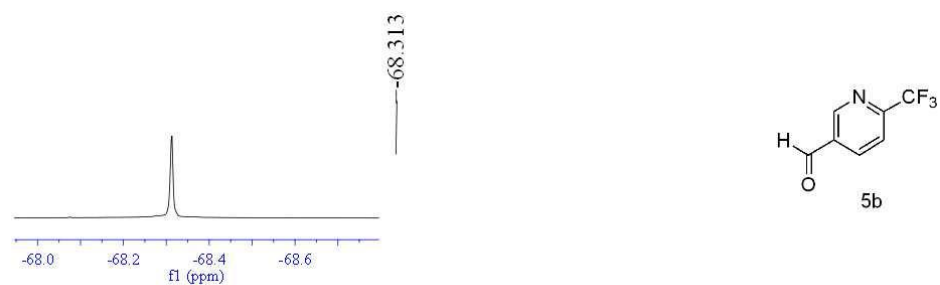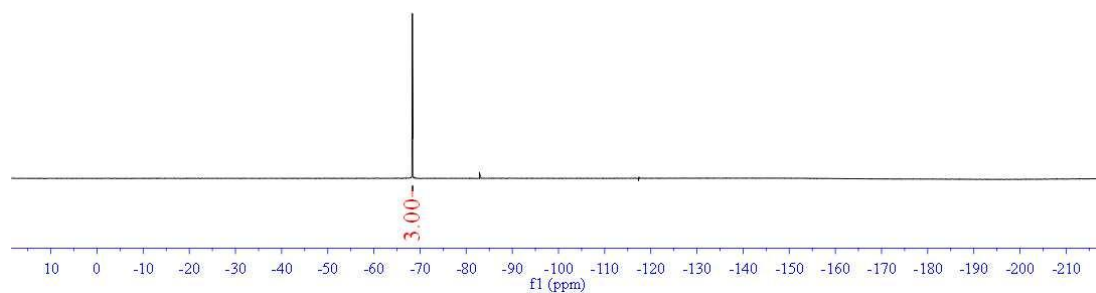

$^{13}\text{C}$  NMR spectrum of **5b** in  $\text{CDCl}_3$

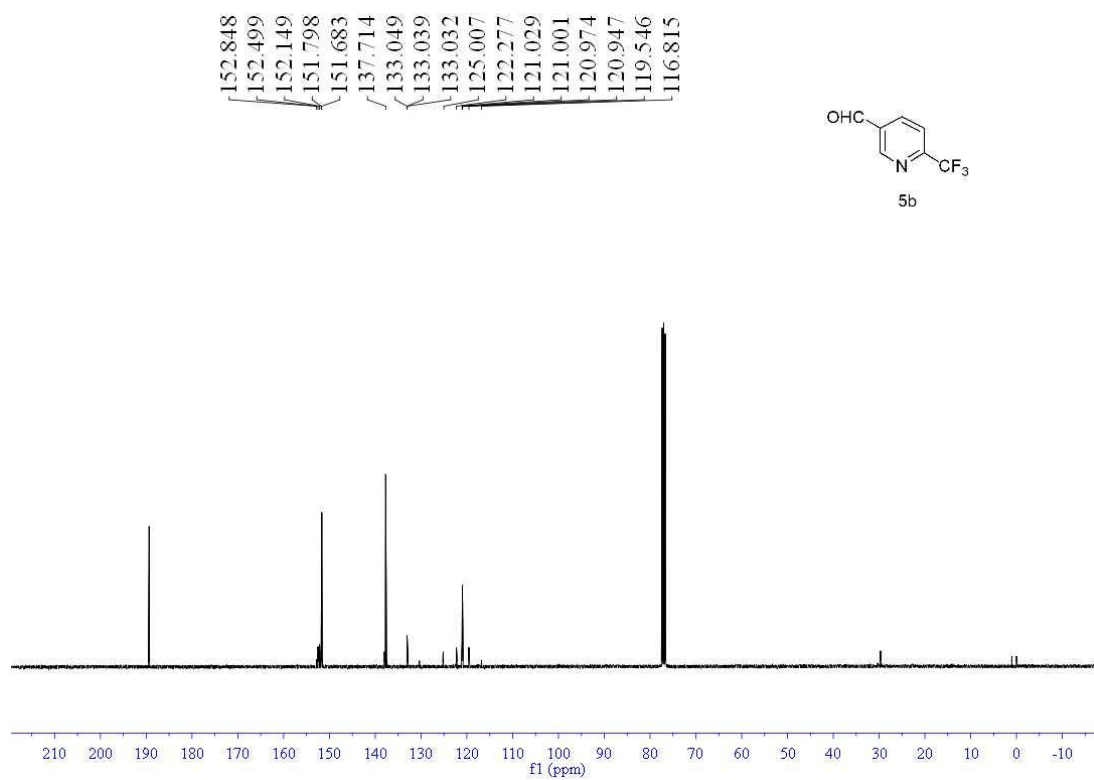

$^{19}\text{F}$  NMR spectrum of **5b** (unlocked)

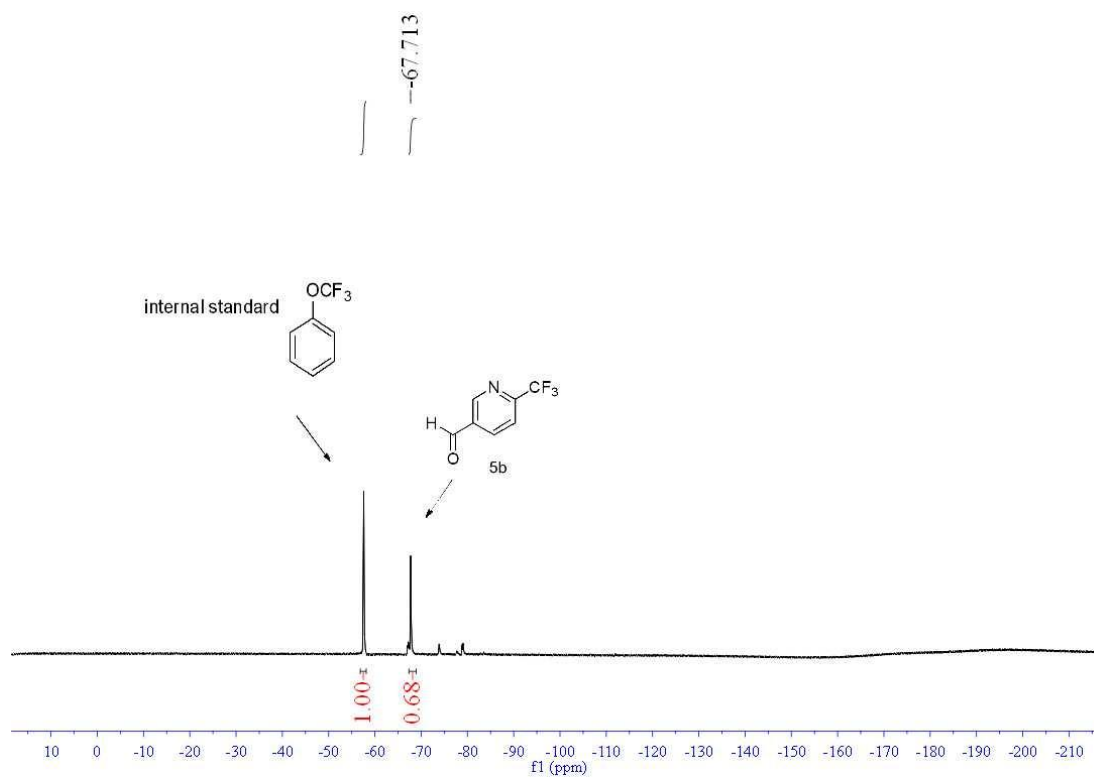

$^1\text{H}$  NMR spectrum of **5c** in  $\text{CDCl}_3$

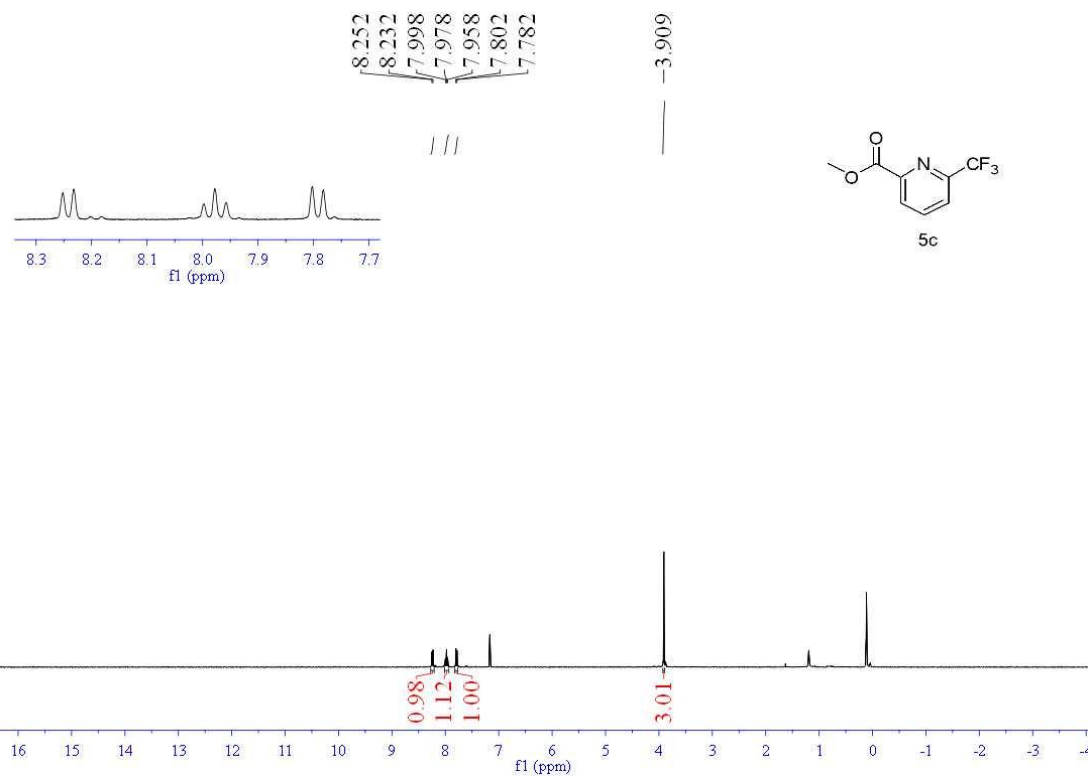

$^{19}\text{F}$  NMR spectrum of **5c** in  $\text{CDCl}_3$

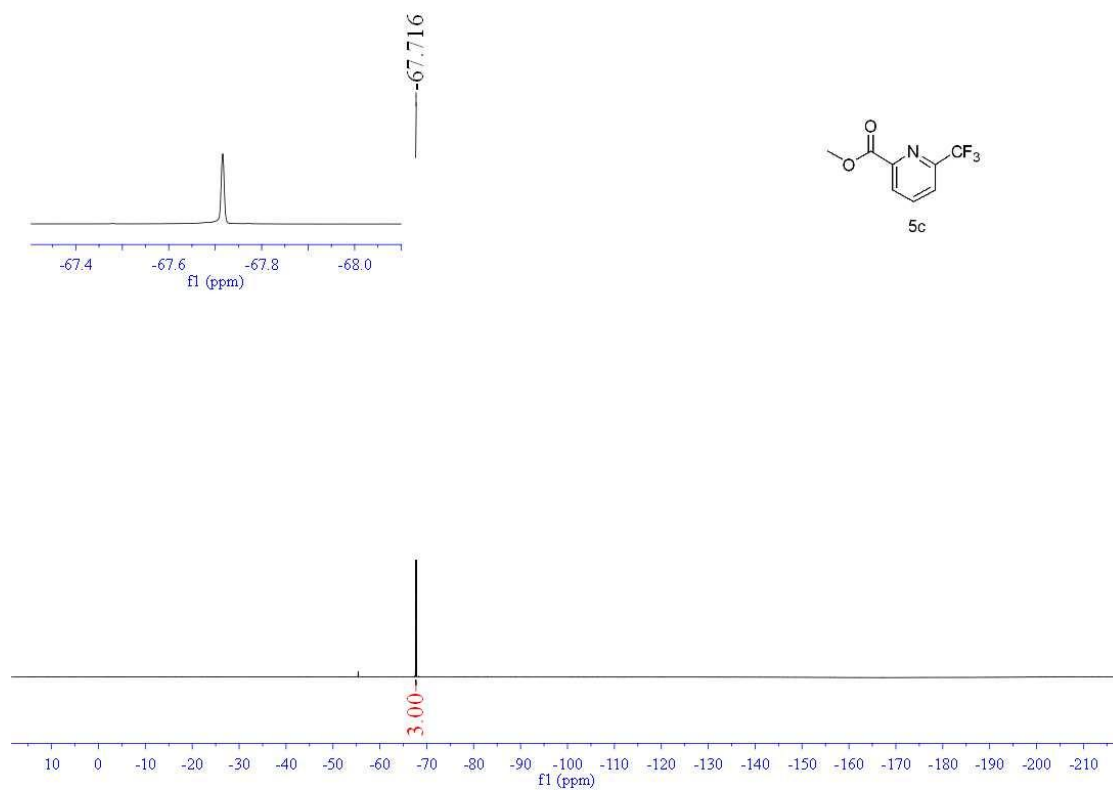

$^{13}\text{C}$  NMR spectrum of **5c** in  $\text{CDCl}_3$

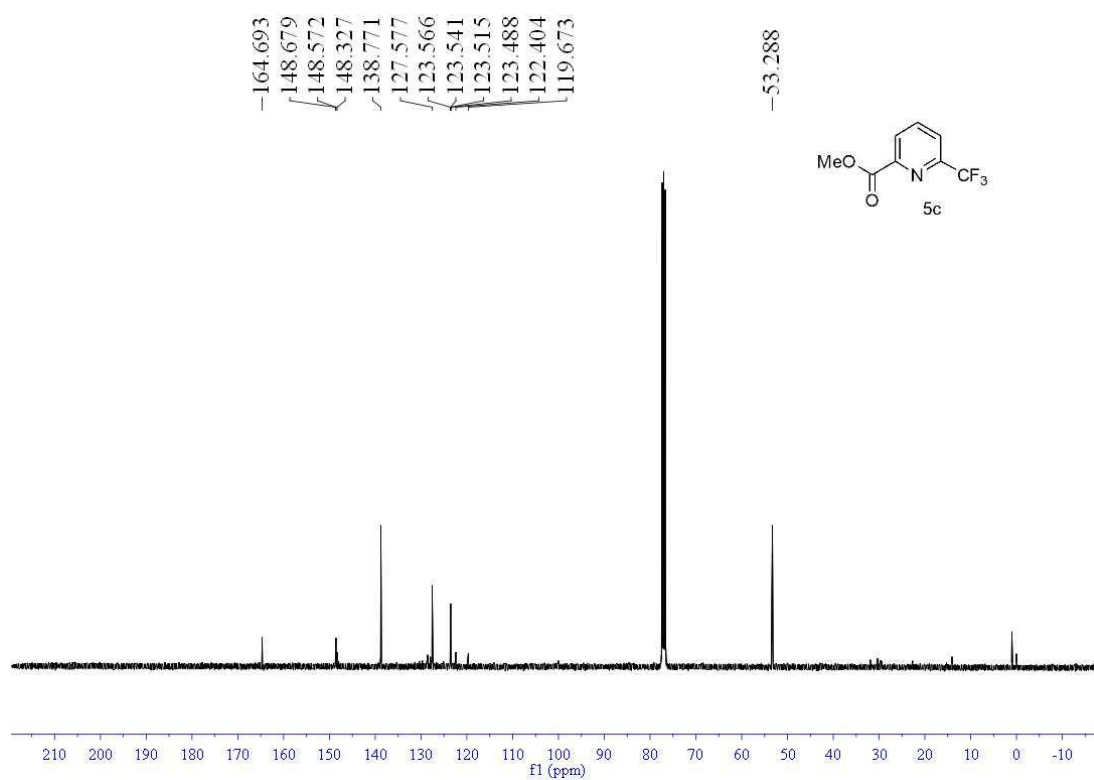

$^{19}\text{F}$  NMR spectrum of **5c** (unlocked)

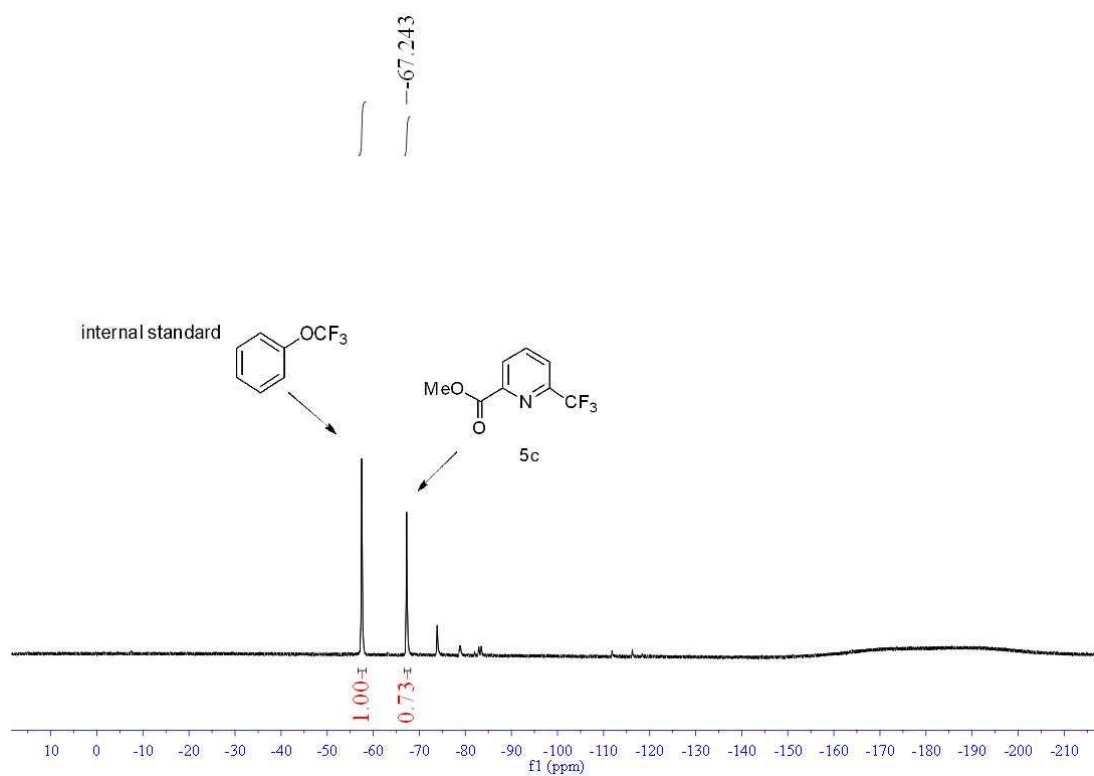

$^1\text{H}$  NMR spectrum of **5d** in  $\text{CDCl}_3$

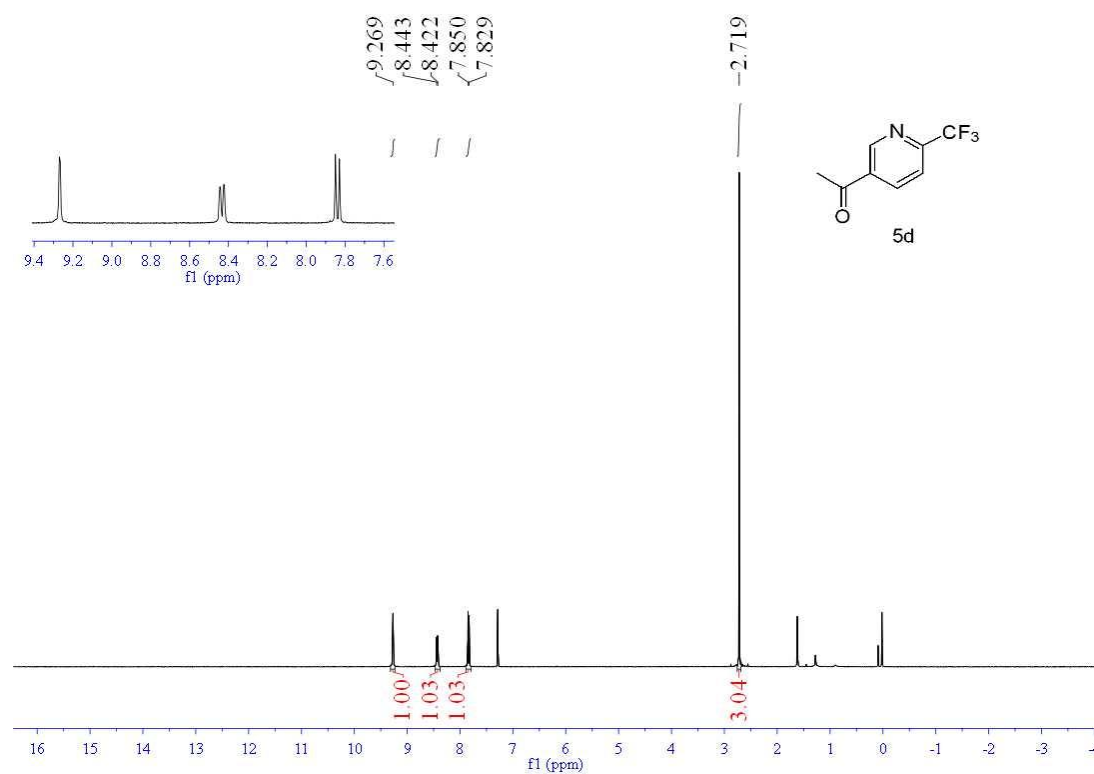

$^{19}\text{F}$  NMR spectrum of **5d** in  $\text{CDCl}_3$

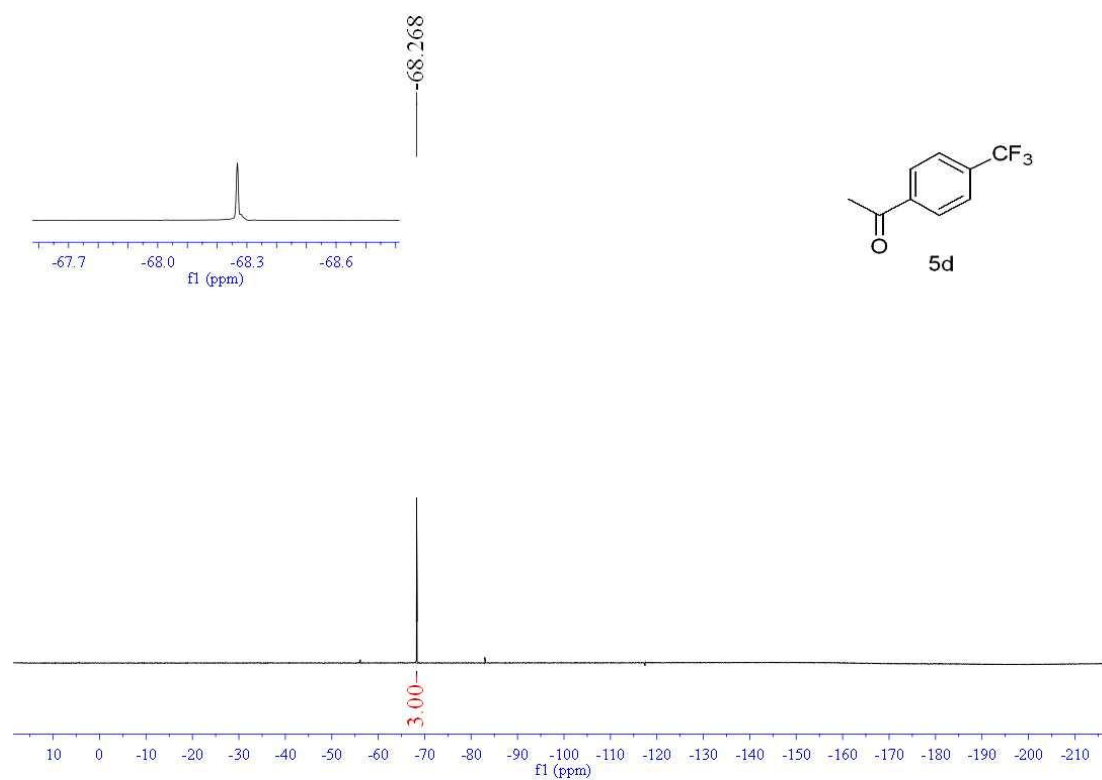

$^{13}\text{C}$  NMR spectrum of **5d** in  $\text{CDCl}_3$

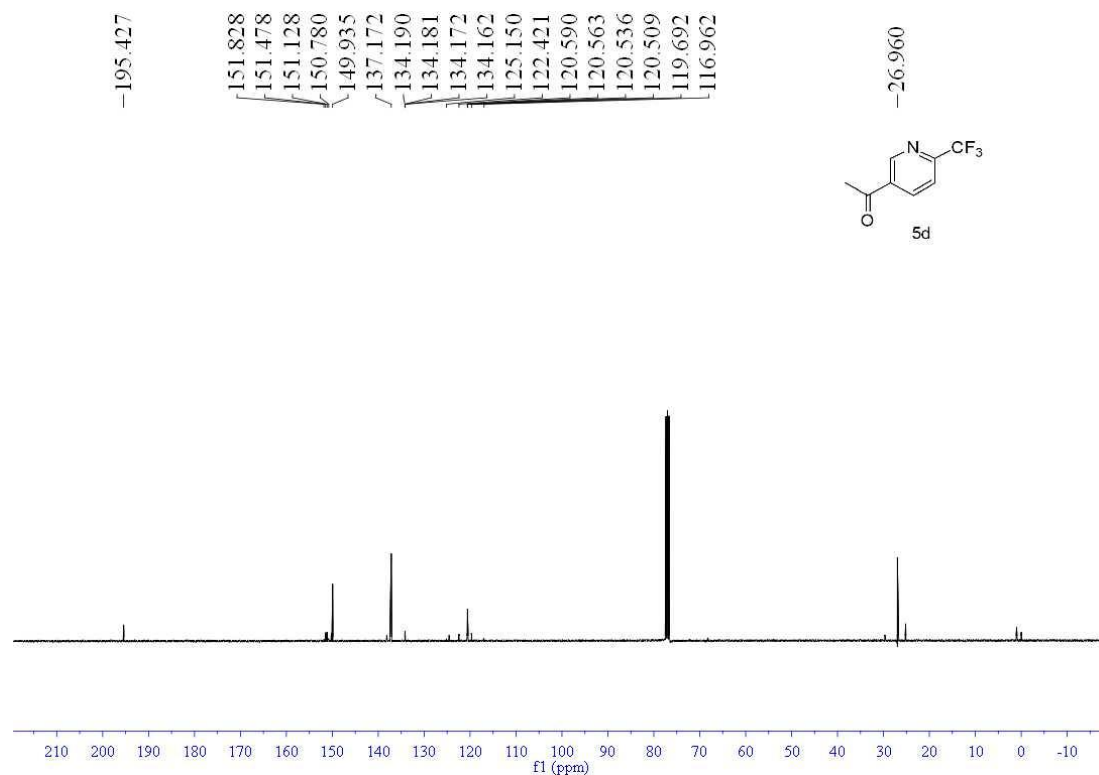

$^{19}\text{F}$  NMR spectrum of **5d** (unlocked)

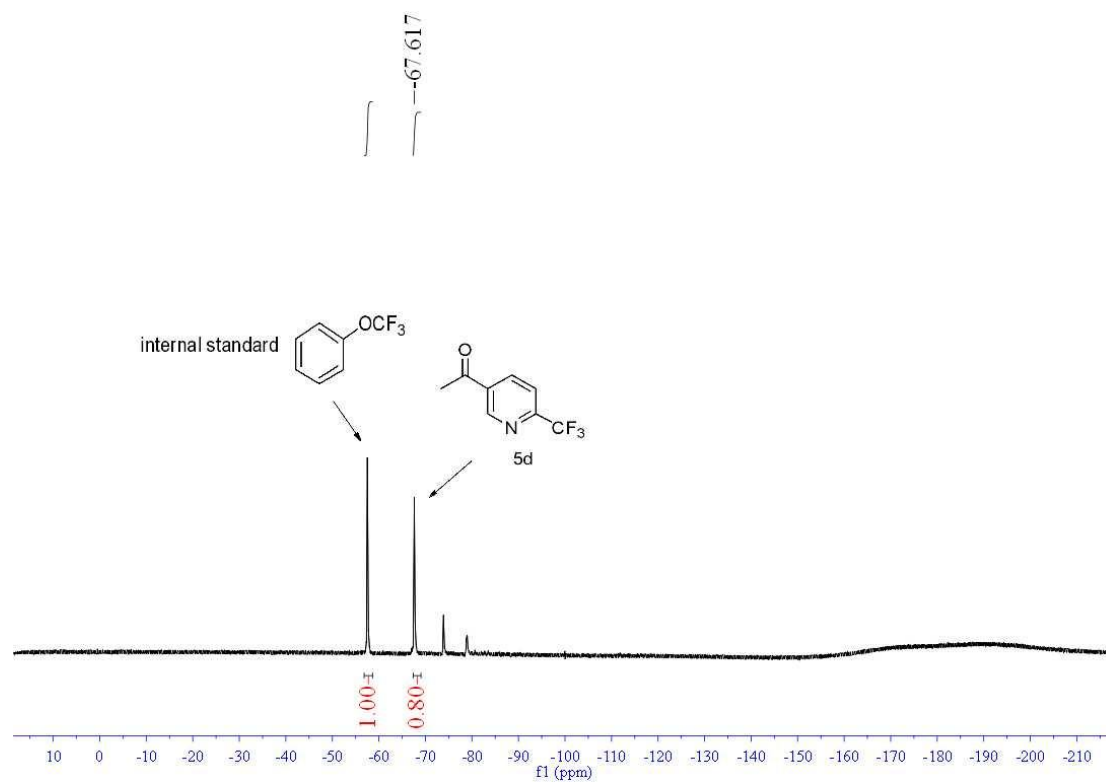

$^1\text{H}$  NMR spectrum of **5e** in  $\text{CDCl}_3$

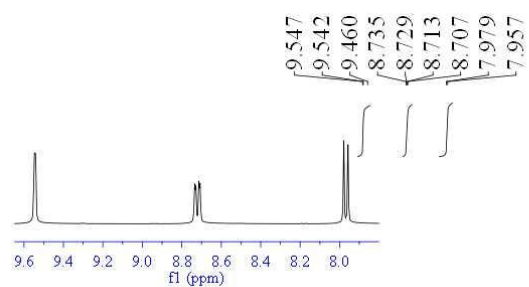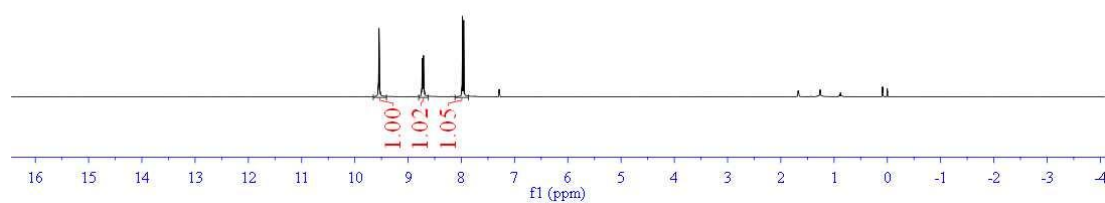

$^{19}\text{F}$  NMR spectrum of **5e** in  $\text{CDCl}_3$

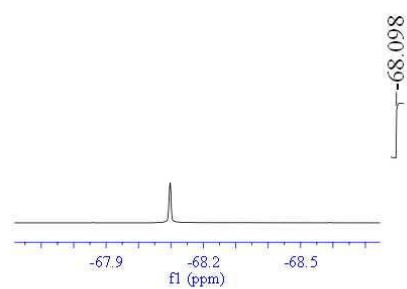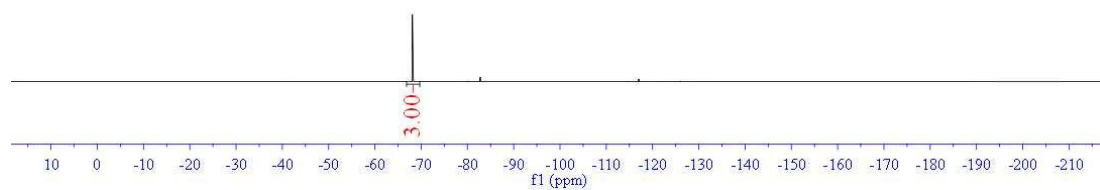

$^{13}\text{C}$  NMR spectrum of **5e** in  $\text{CDCl}_3$

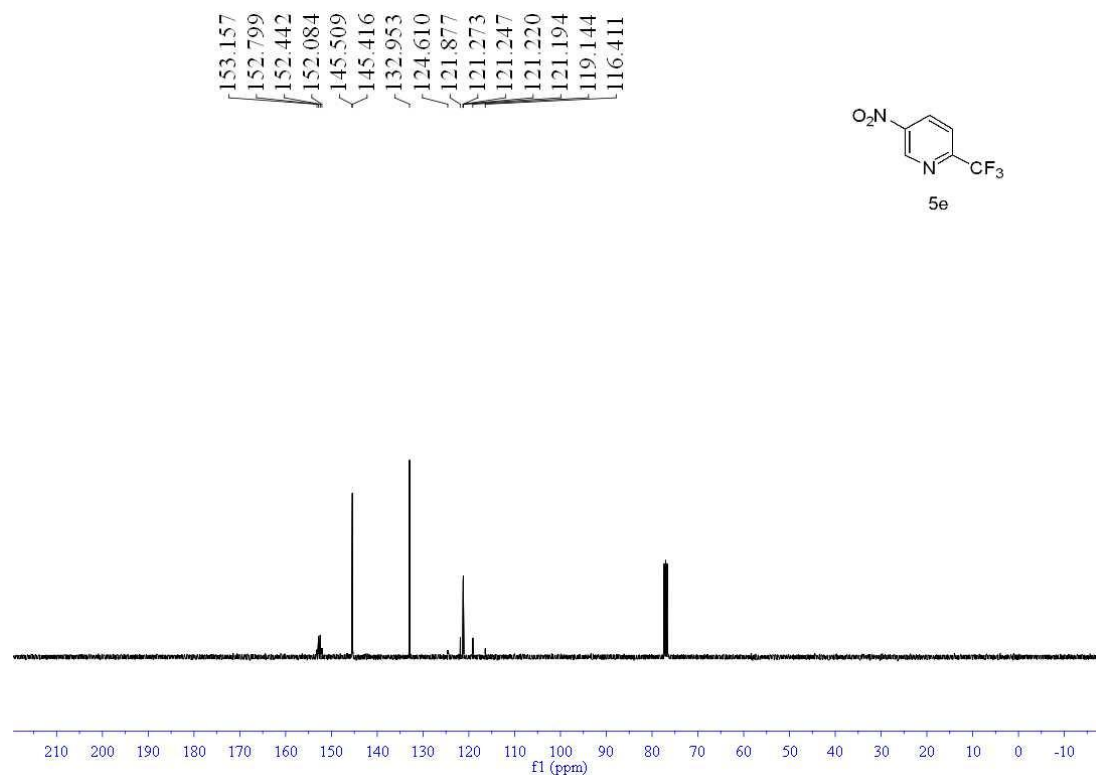

$^{19}\text{F}$  NMR spectrum of **5e** (unlocked)

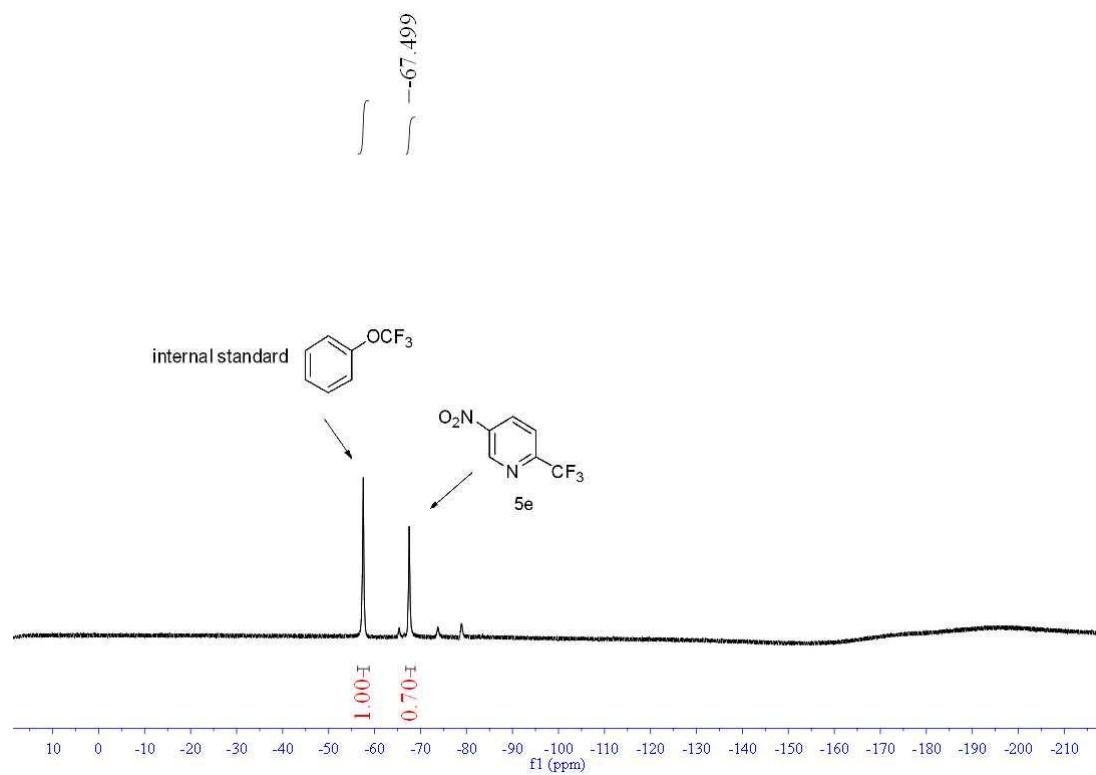

$^1\text{H}$  NMR spectrum of **5f** in  $\text{CDCl}_3$

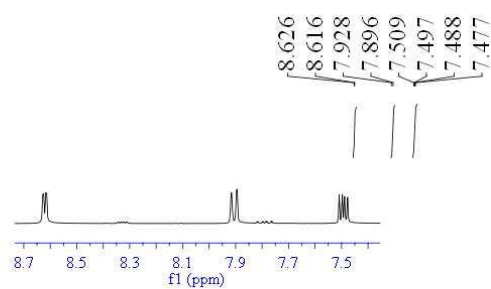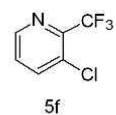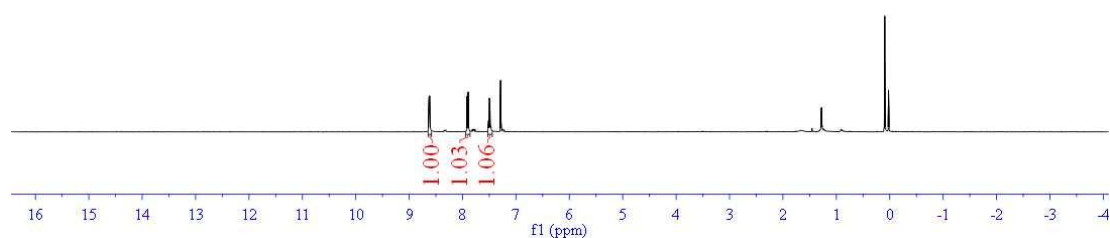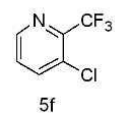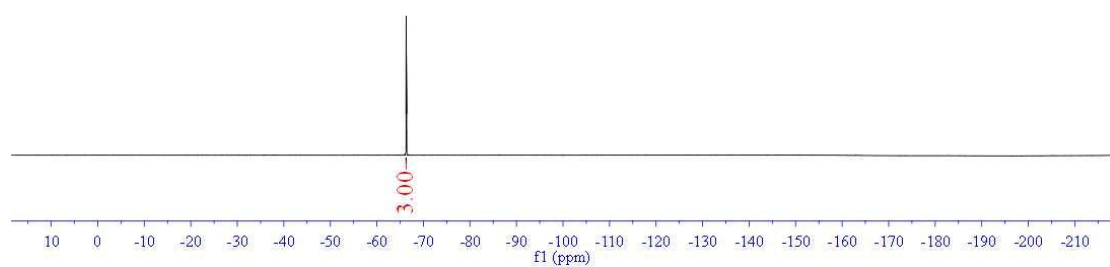

$^{13}\text{C}$  NMR spectrum of **5f** in  $\text{CDCl}_3$

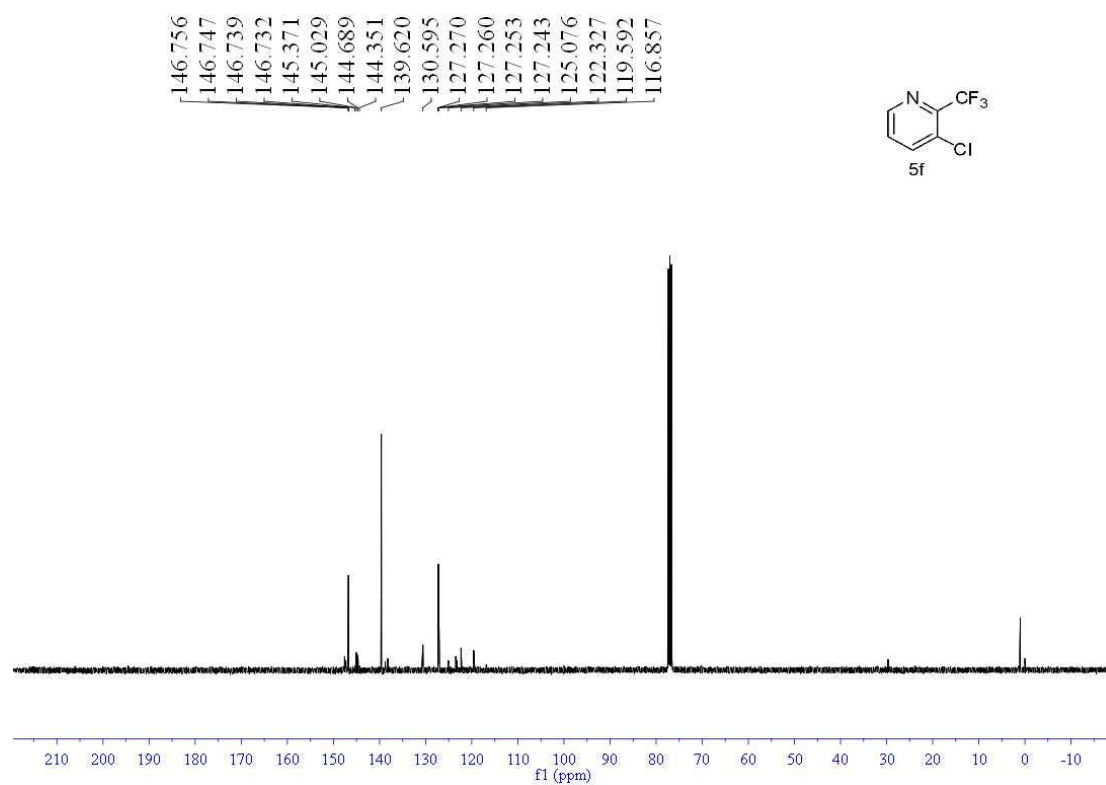

$^{19}\text{F}$  NMR spectrum of **5f** (unlocked)

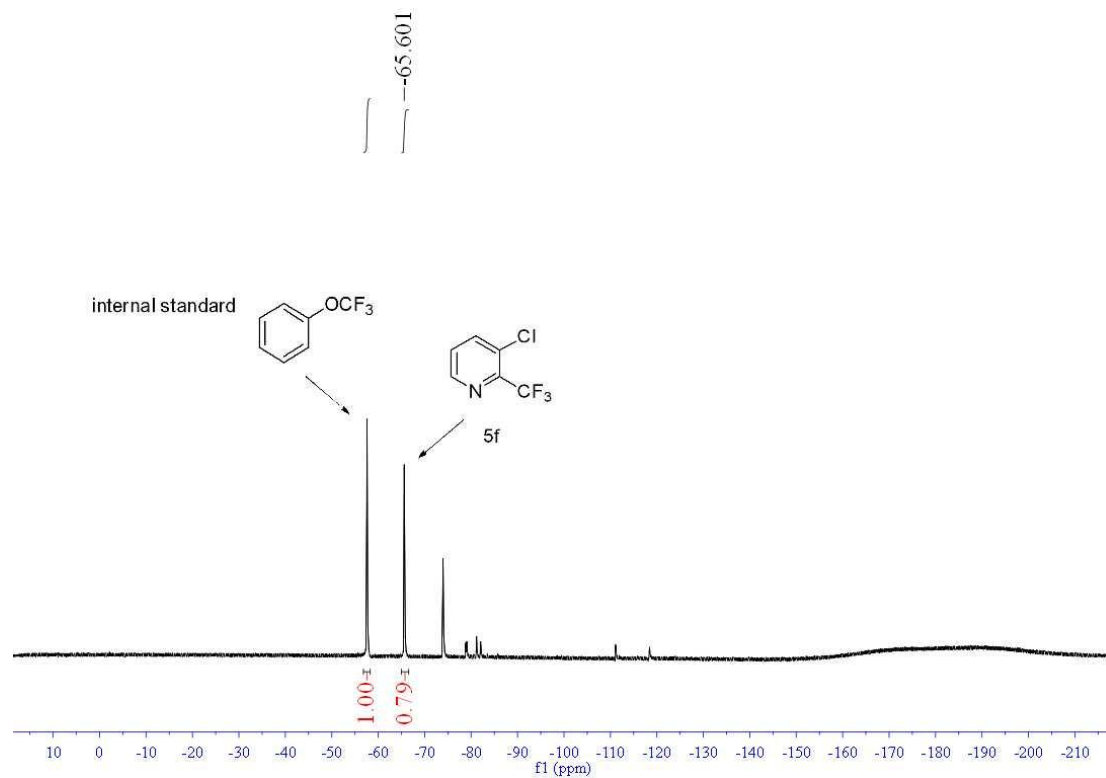

$^1\text{H}$  NMR spectrum of **5g** in  $\text{CDCl}_3$

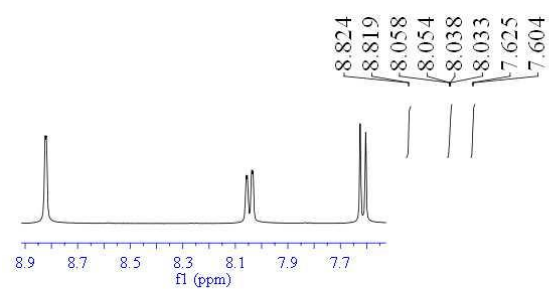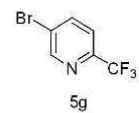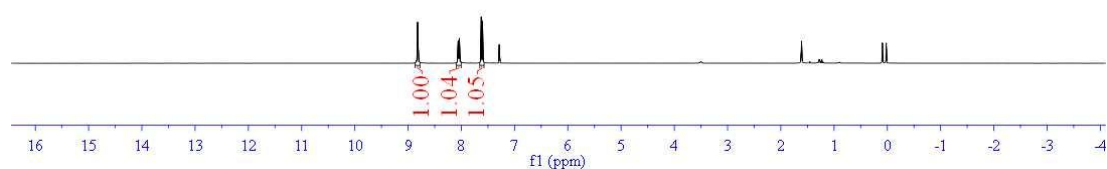

$^{19}\text{F}$  NMR spectrum of **5g** in  $\text{CDCl}_3$

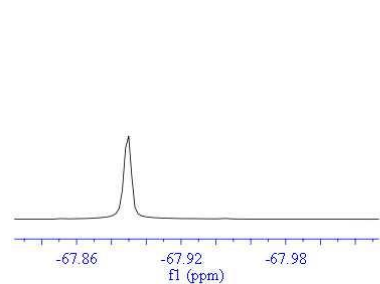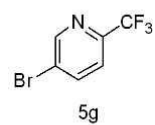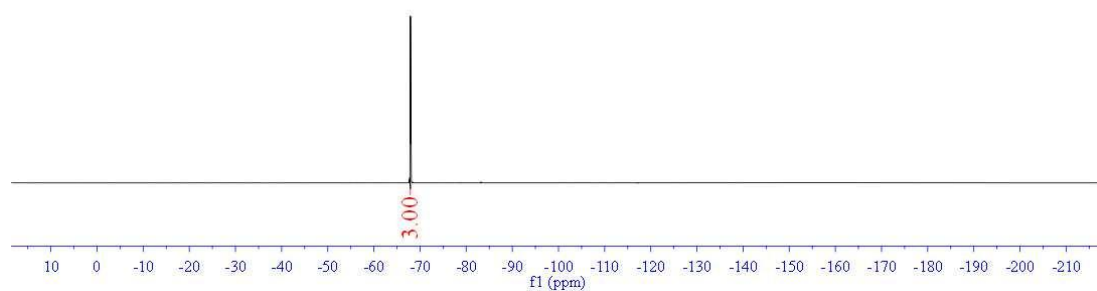

$^{13}\text{C}$  NMR spectrum of **5g** in  $\text{CDCl}_3$

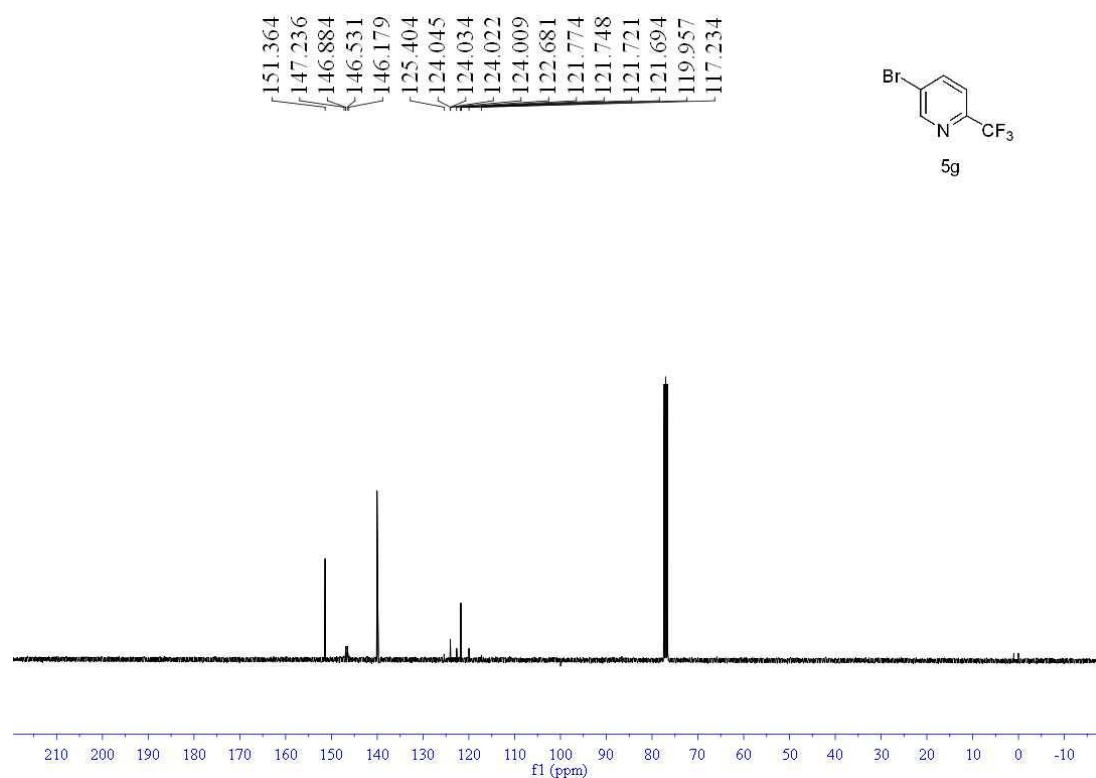

$^{19}\text{F}$  NMR spectrum of **5g** (unlocked)

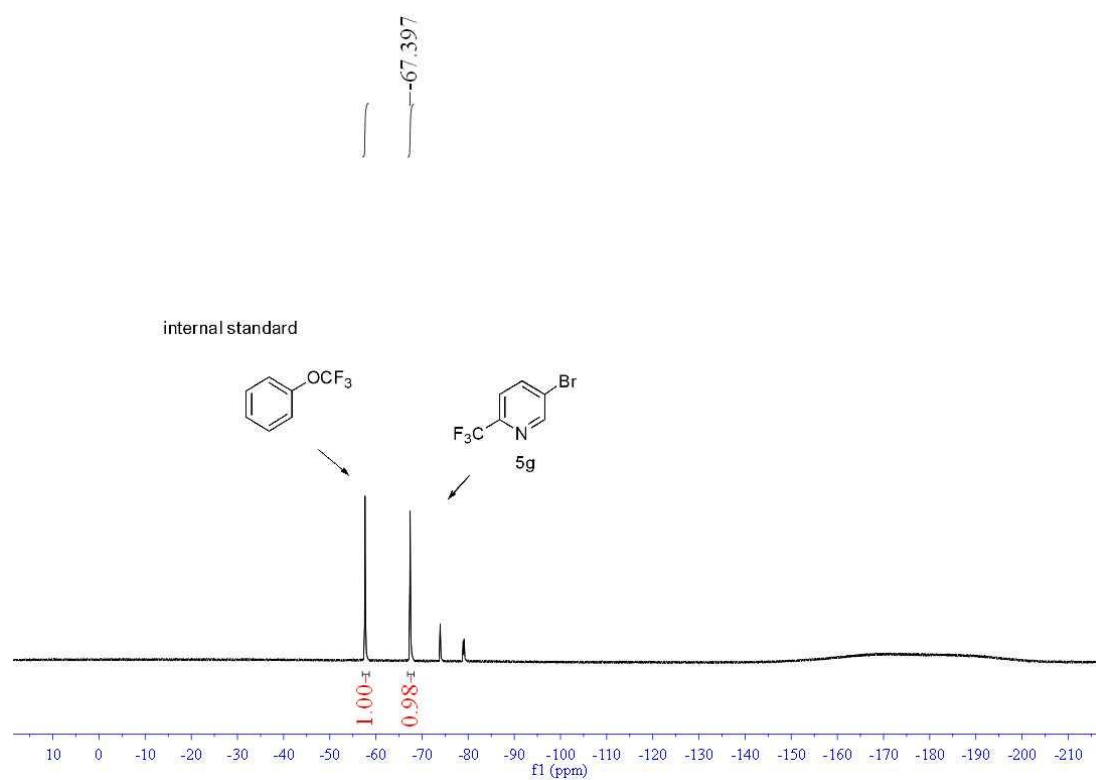

$^1\text{H}$  NMR spectrum of **5h** in  $\text{CDCl}_3$

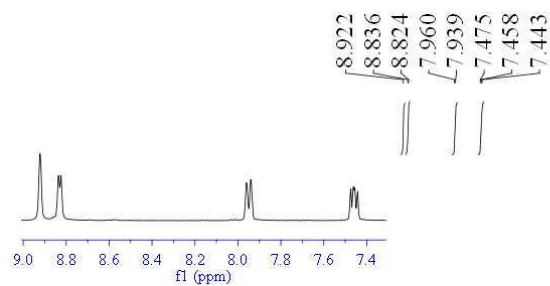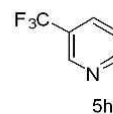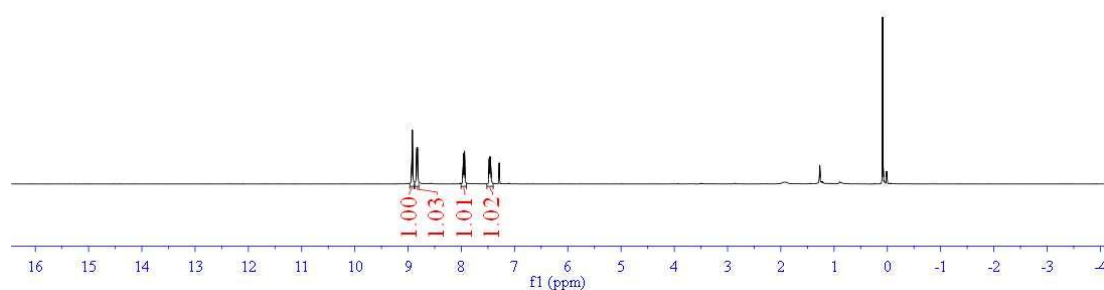

$^{19}\text{F}$  NMR spectrum of **5h** in  $\text{CDCl}_3$

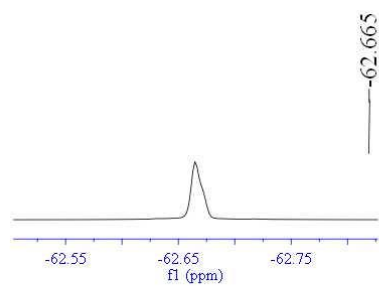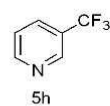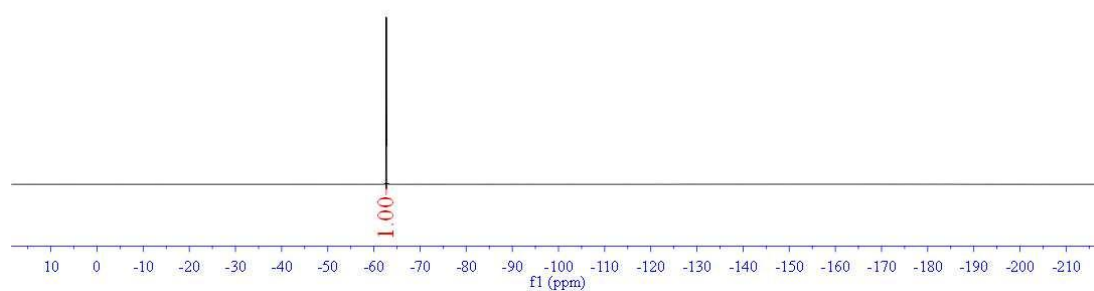

$^{13}\text{C}$  NMR spectrum of **5h** in  $\text{CDCl}_3$

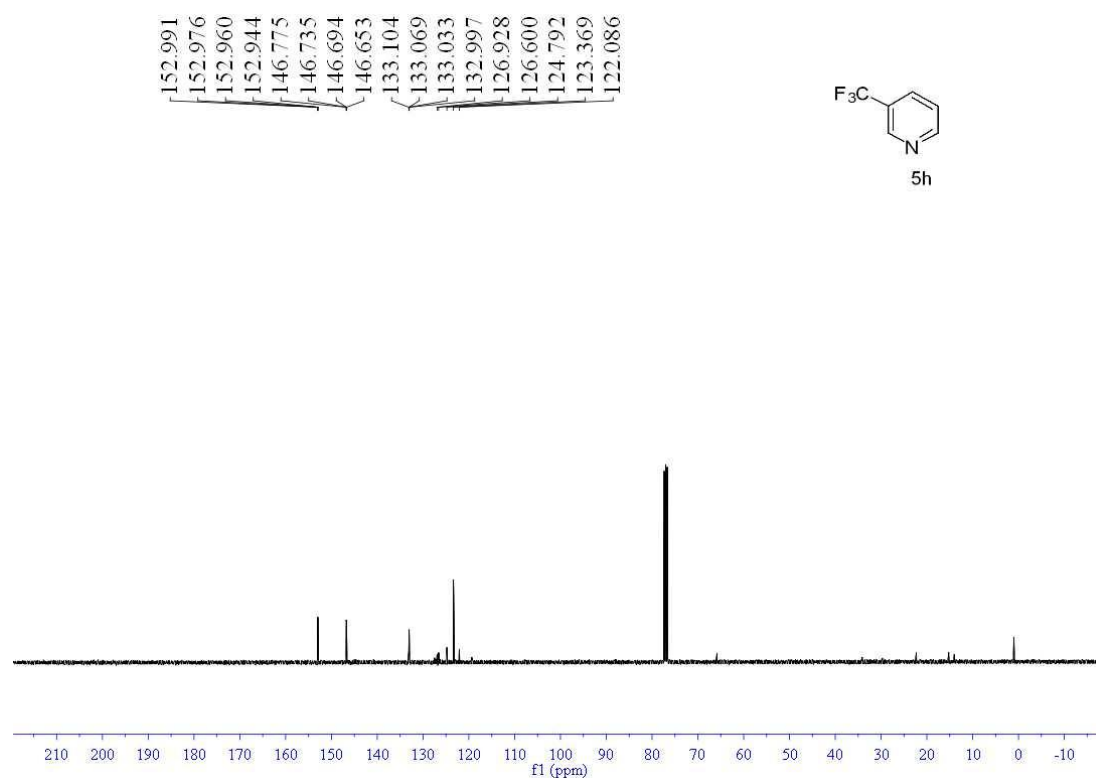

$^{19}\text{F}$  NMR spectrum of **5h** (unlocked)

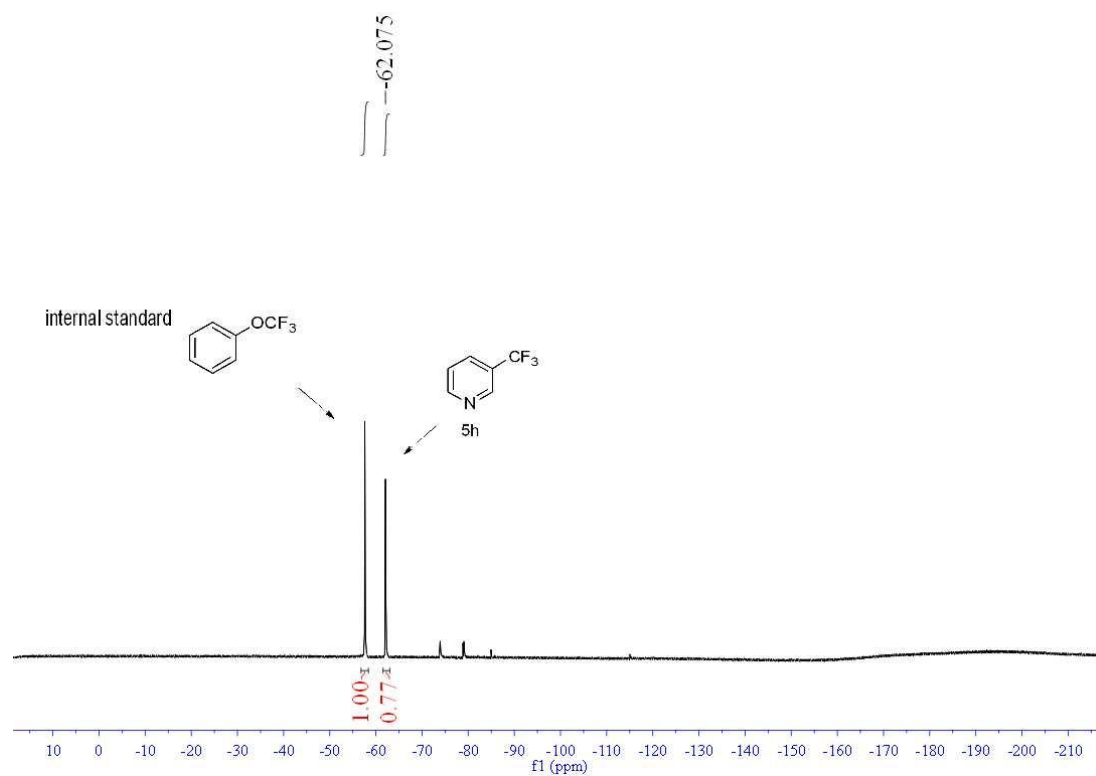

$^1\text{H}$  NMR spectrum of **5i** in  $\text{CDCl}_3$

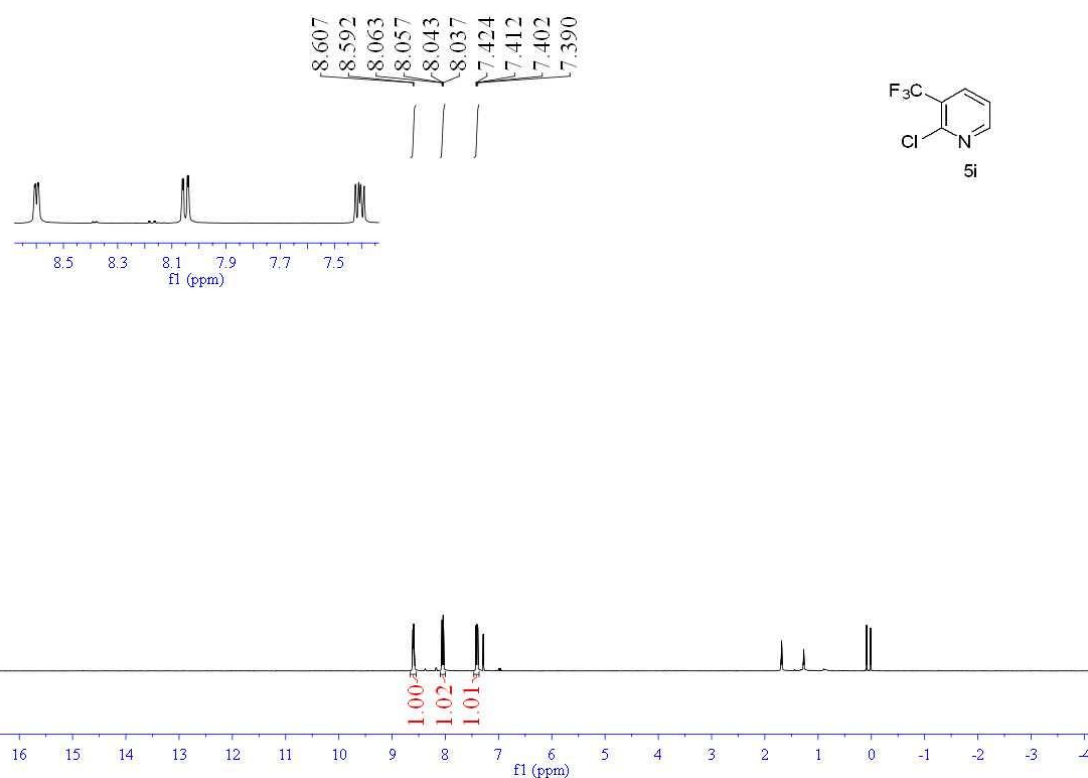

$^{19}\text{F}$  NMR spectrum of **5i** in  $\text{CDCl}_3$

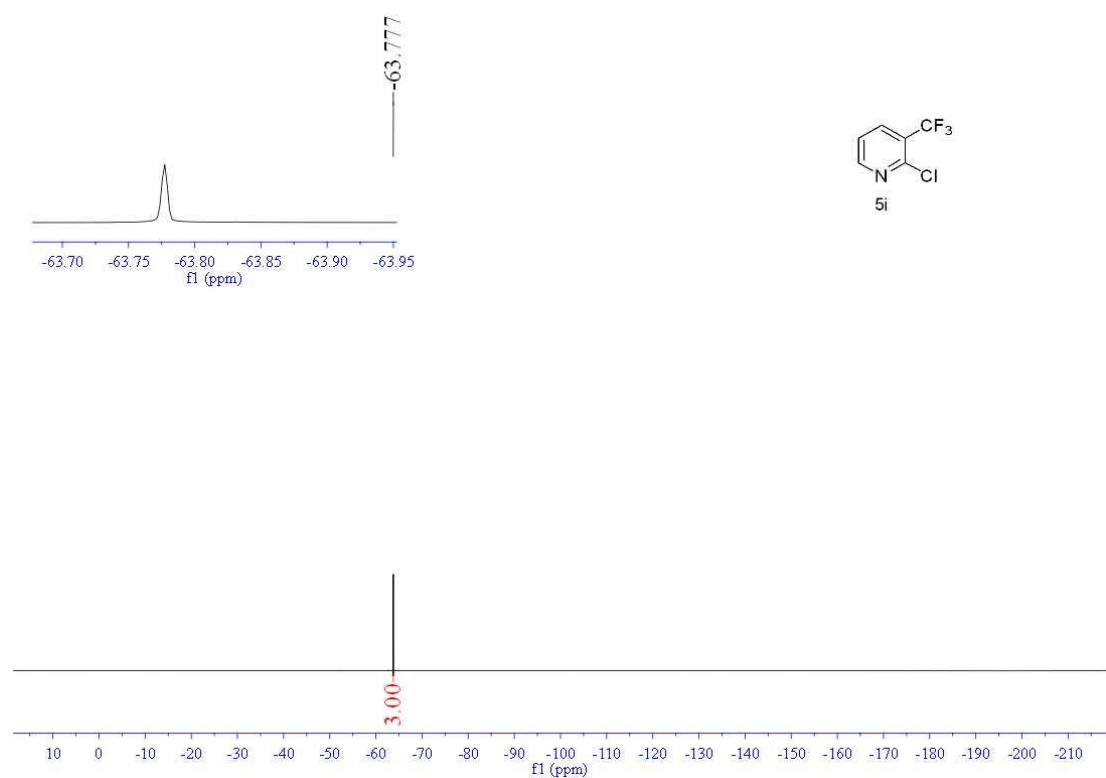

$^{13}\text{C}$  NMR spectrum of **5i** in  $\text{CDCl}_3$

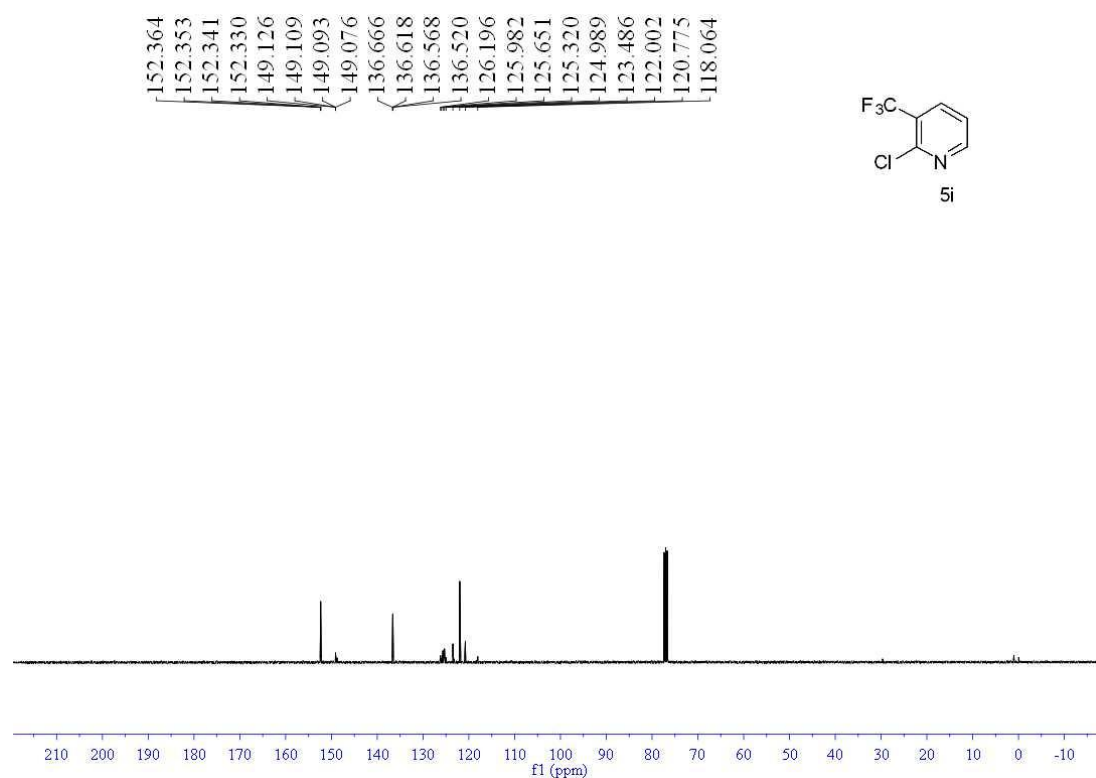

$^{19}\text{F}$  NMR spectrum of **5i** (unlocked)

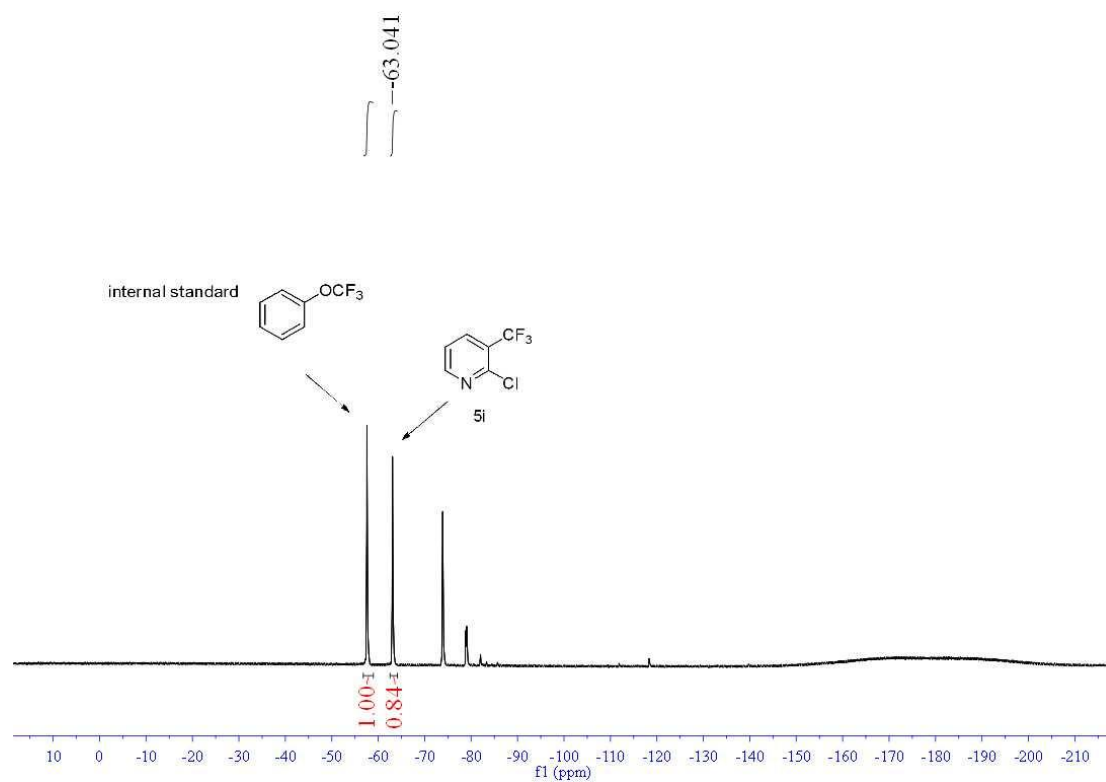

$^1\text{H}$  NMR spectrum of **5j** in  $\text{CDCl}_3$

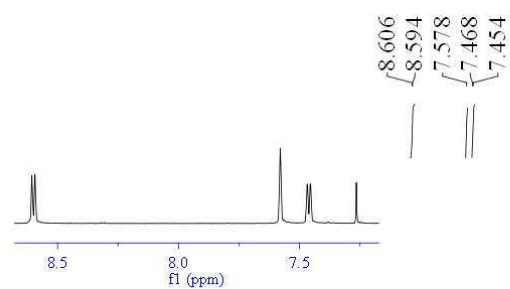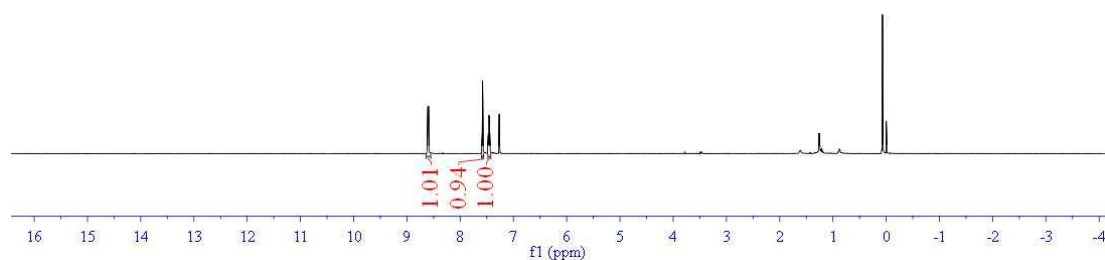

$^{19}\text{F}$  NMR spectrum of **5j** in  $\text{CDCl}_3$

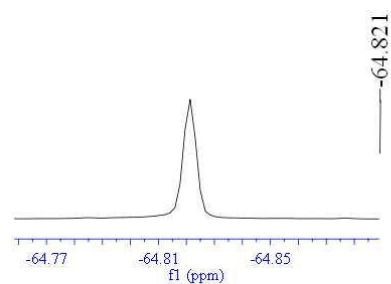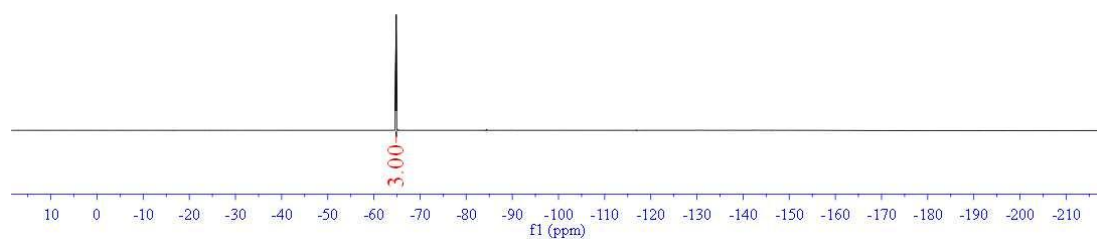

$^{13}\text{C}$  NMR spectrum of **5j** in  $\text{CDCl}_3$

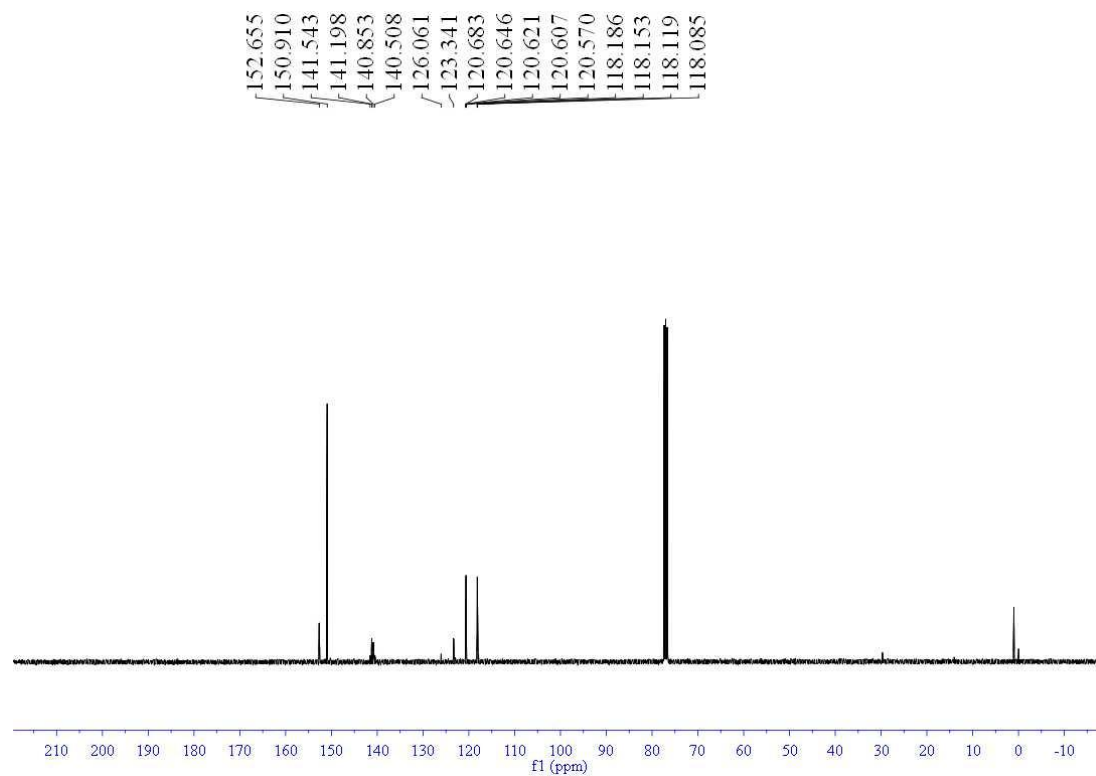

$^{19}\text{F}$  NMR spectrum of **5j** (unlocked)

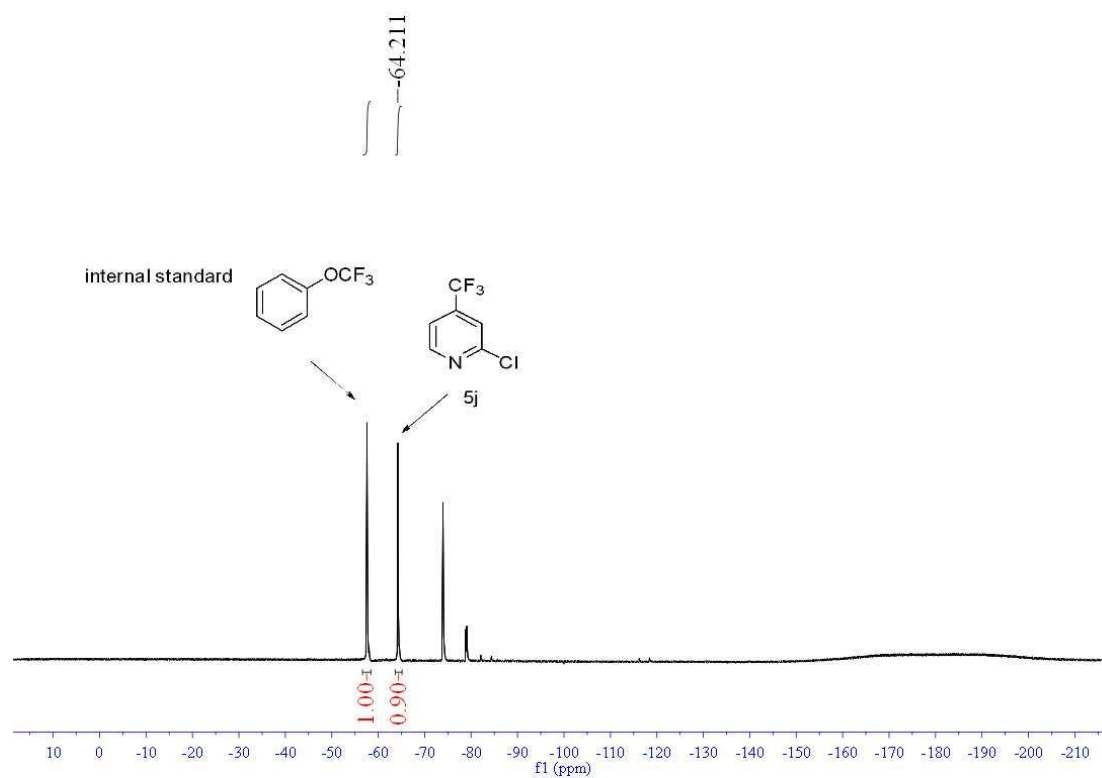

$^1\text{H}$  NMR spectrum of **5k** in  $\text{CDCl}_3$

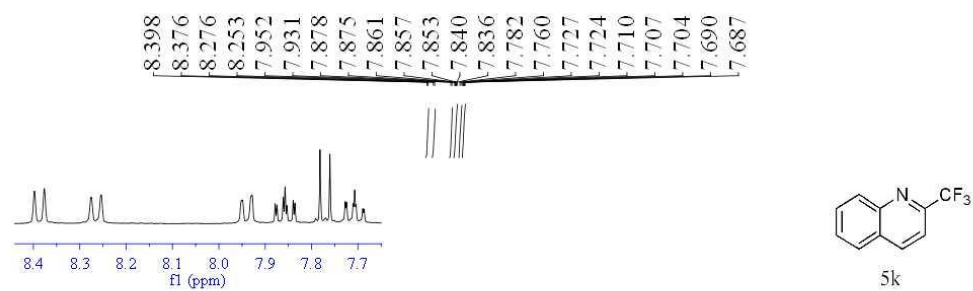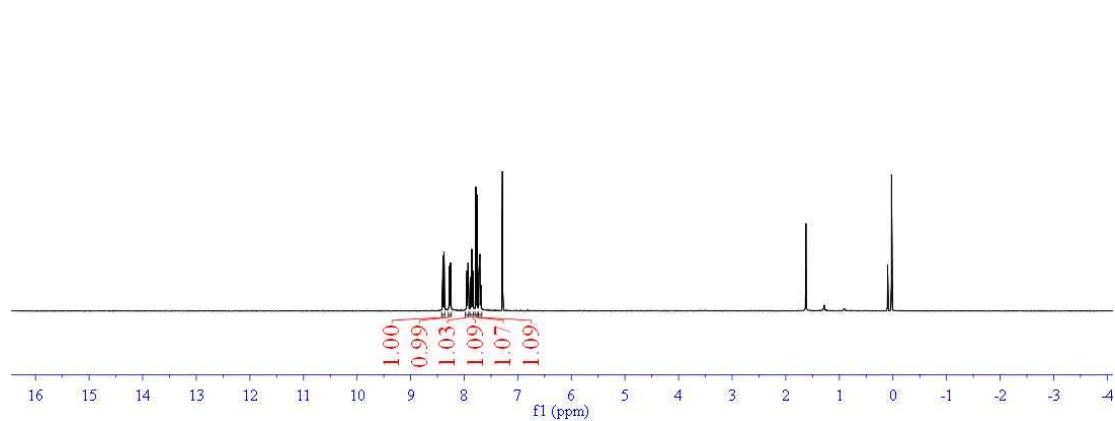

$^{19}\text{F}$  NMR spectrum of **5k** in  $\text{CDCl}_3$

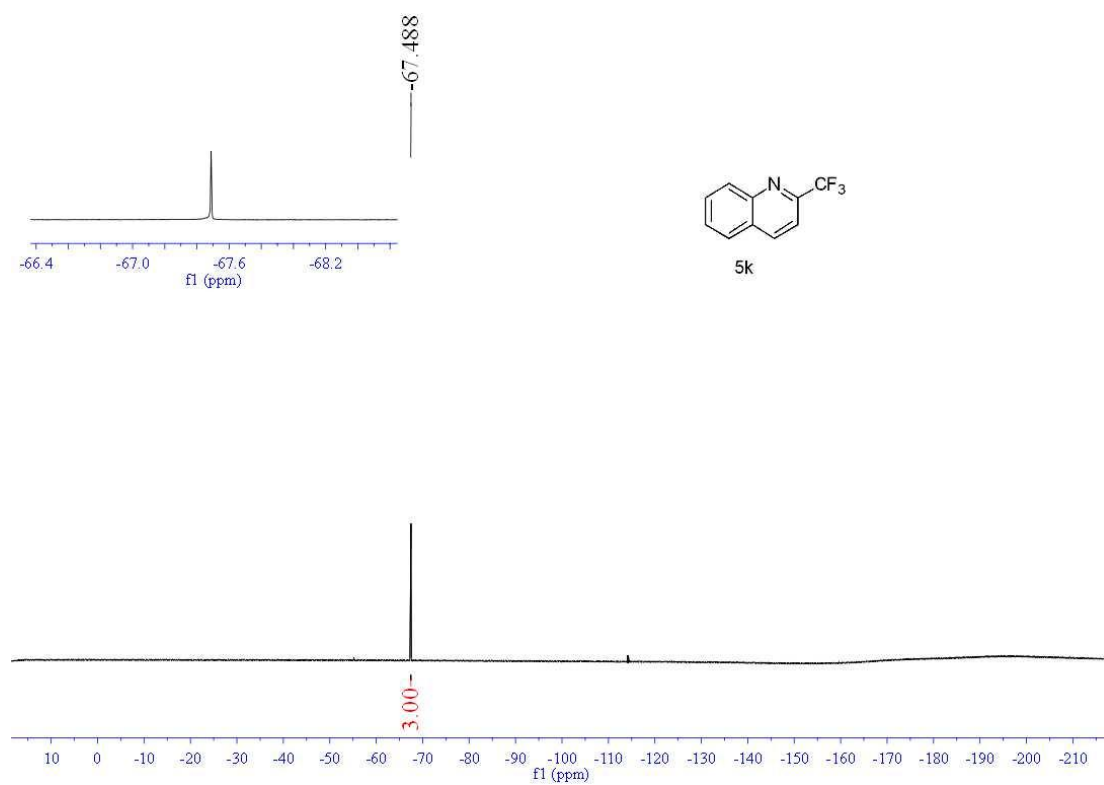

$^{13}\text{C}$  NMR spectrum of **5k** in  $\text{CDCl}_3$

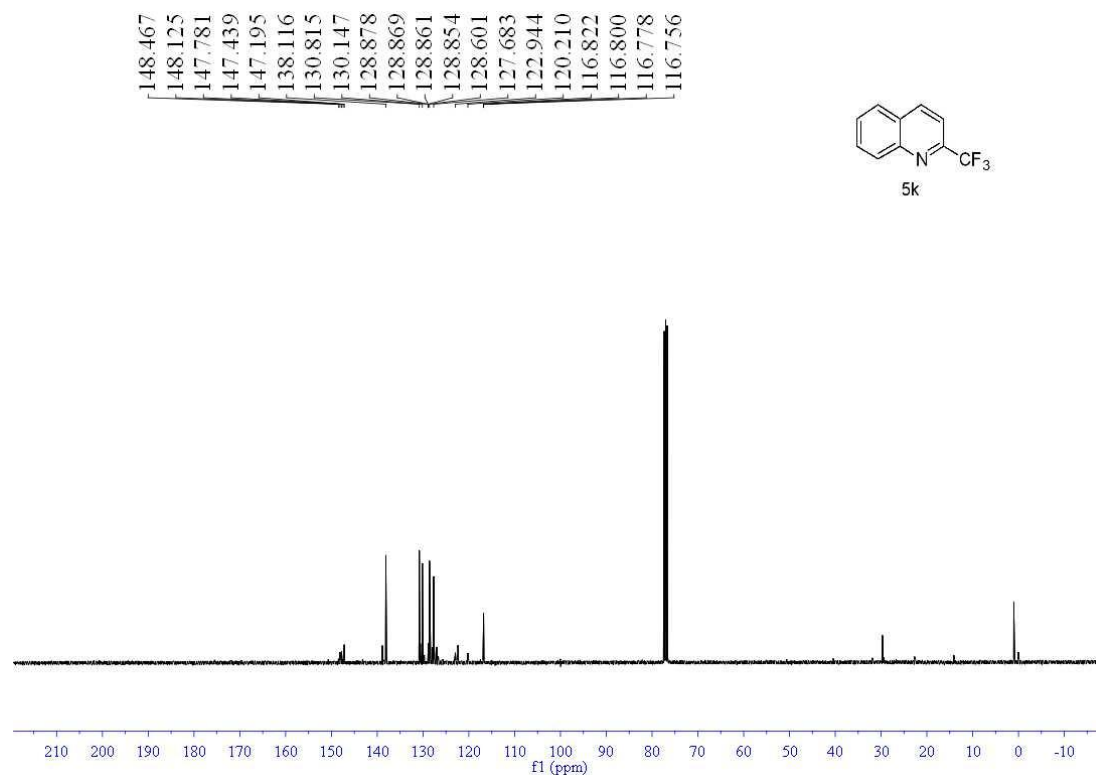

$^{19}\text{F}$  NMR spectrum of **5k** (unlocked)

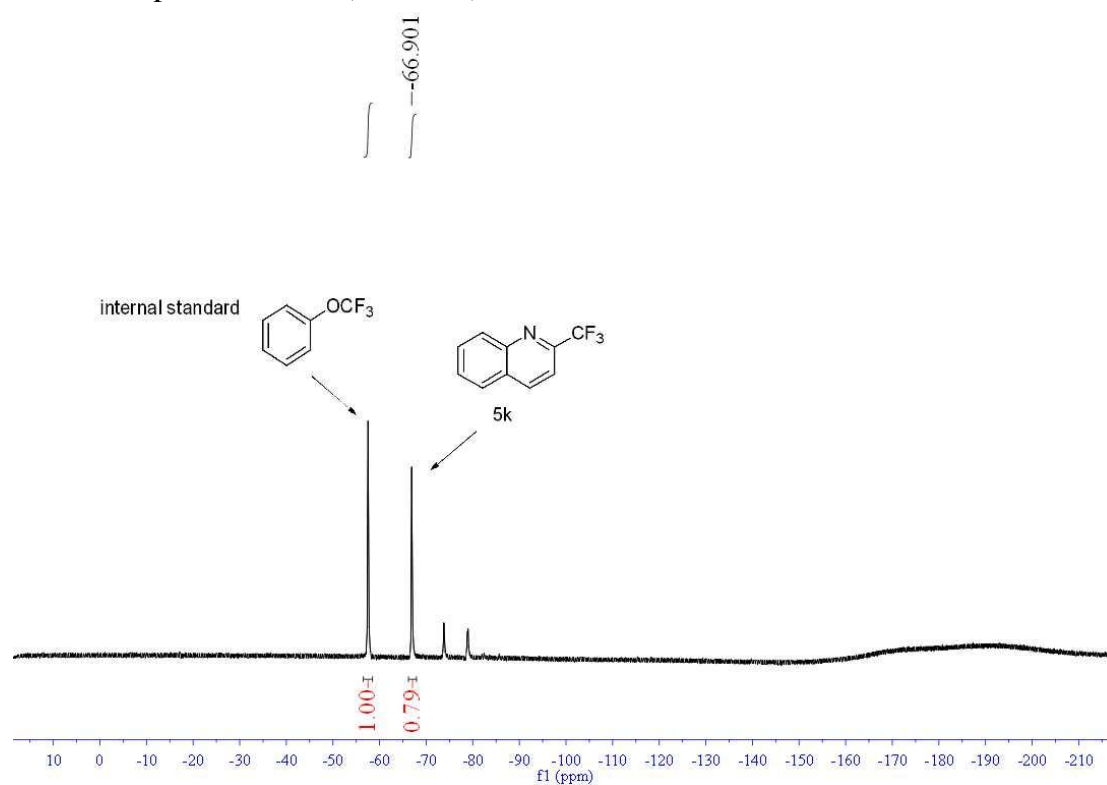

$^1\text{H}$  NMR spectrum of **5l** in  $\text{CDCl}_3$

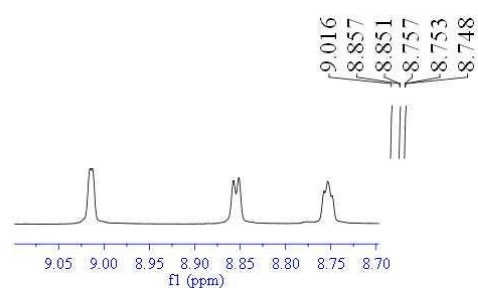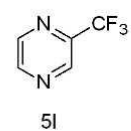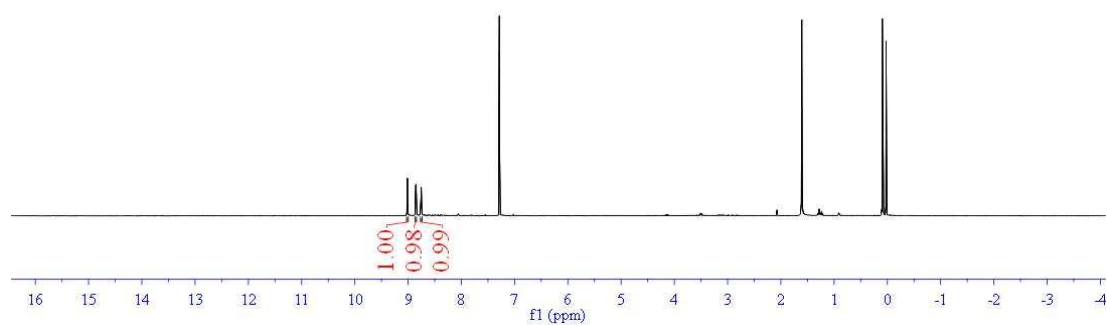

$^{19}\text{F}$  NMR spectrum of **5l** in  $\text{CDCl}_3$

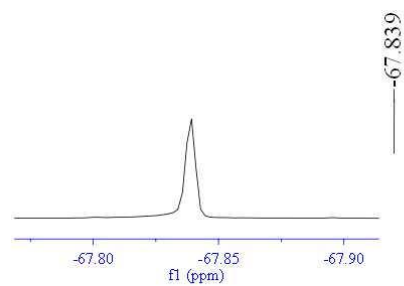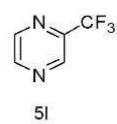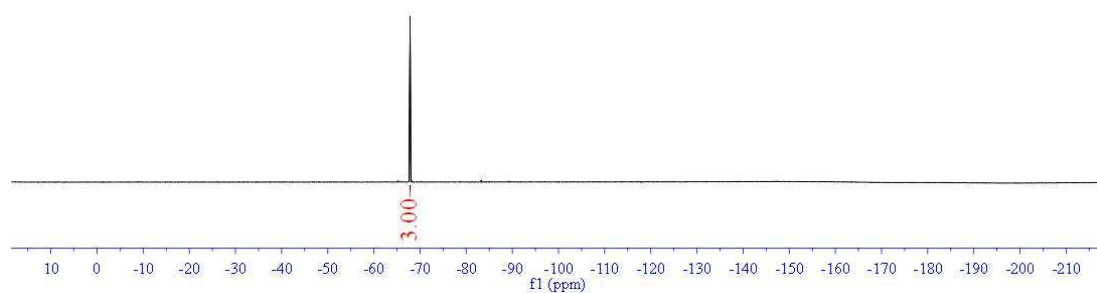

$^{13}\text{C}$  NMR spectrum of **5l** in  $\text{CDCl}_3$

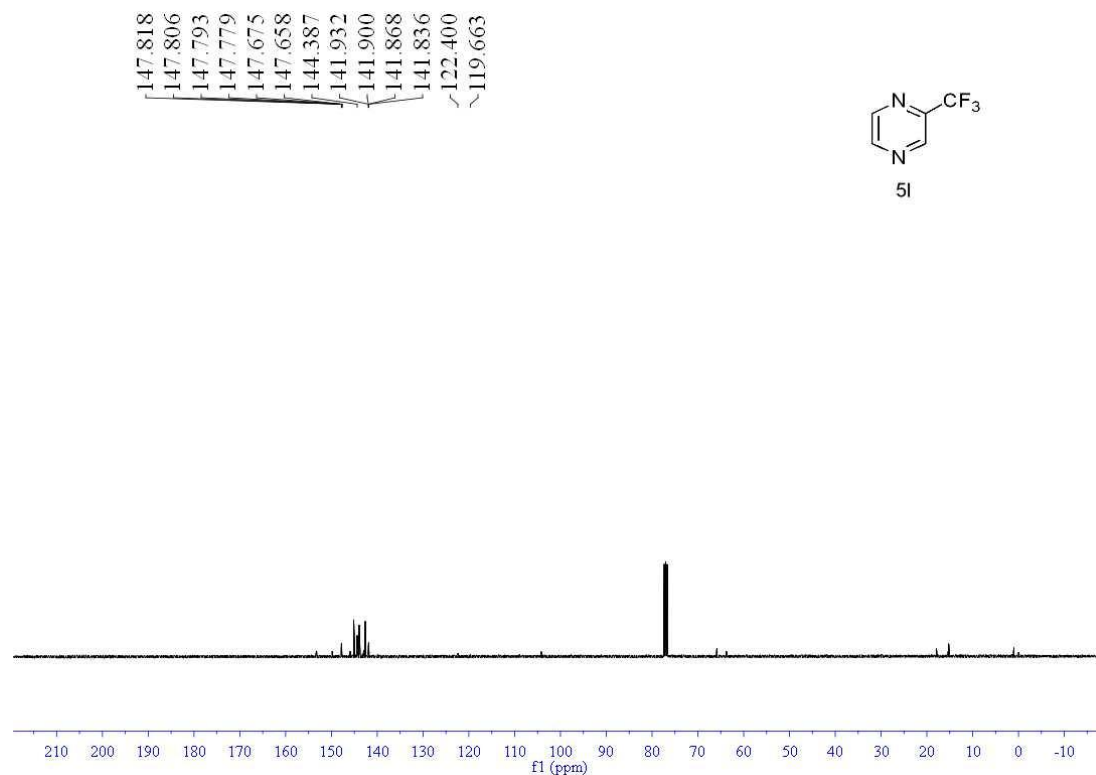

$^{19}\text{F}$  NMR spectrum of **5l** (unlocked)

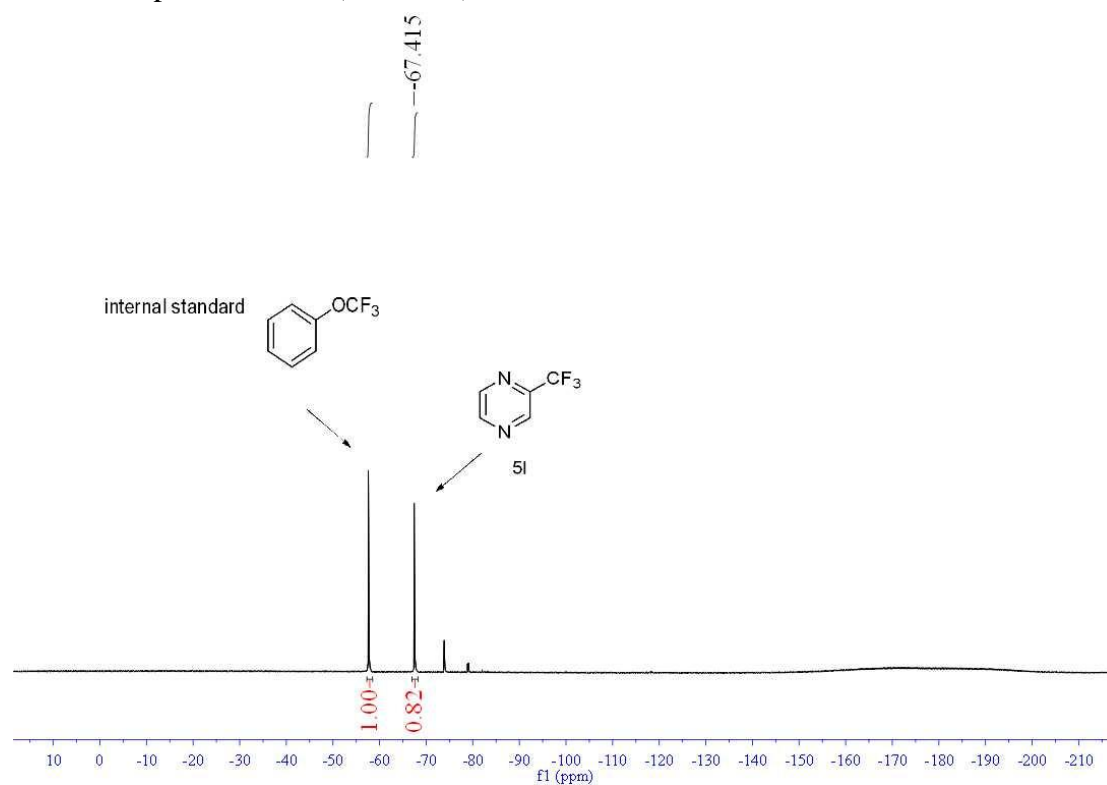

$^1\text{H}$  NMR spectrum of **5m** in  $\text{CDCl}_3$

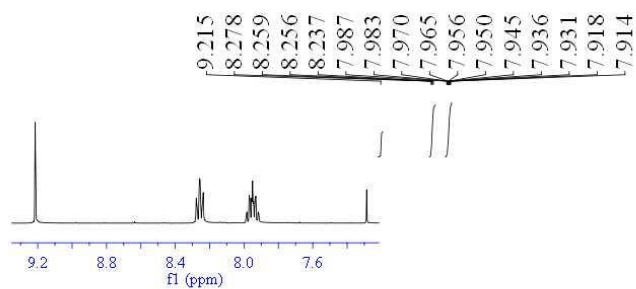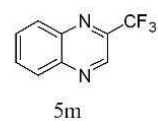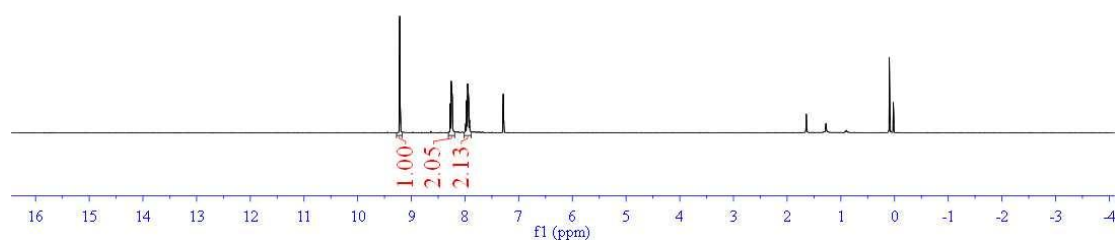

$^{19}\text{F}$  NMR spectrum of **5m** in  $\text{CDCl}_3$

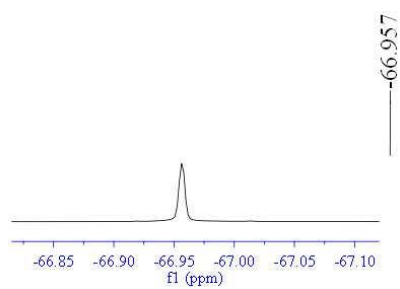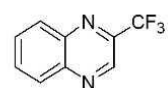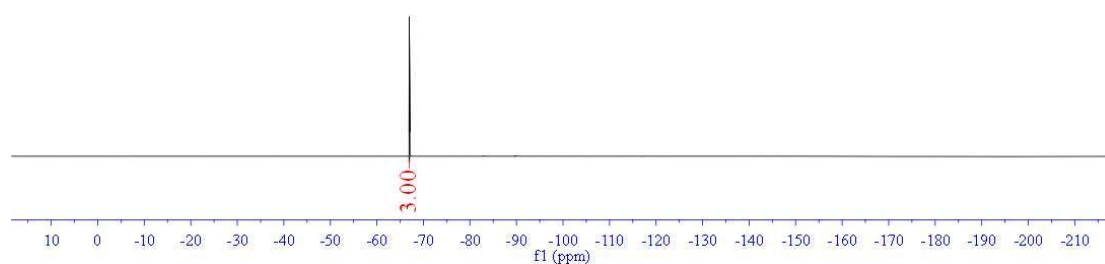

$^{13}\text{C}$  NMR spectrum of **5m** in  $\text{CDCl}_3$

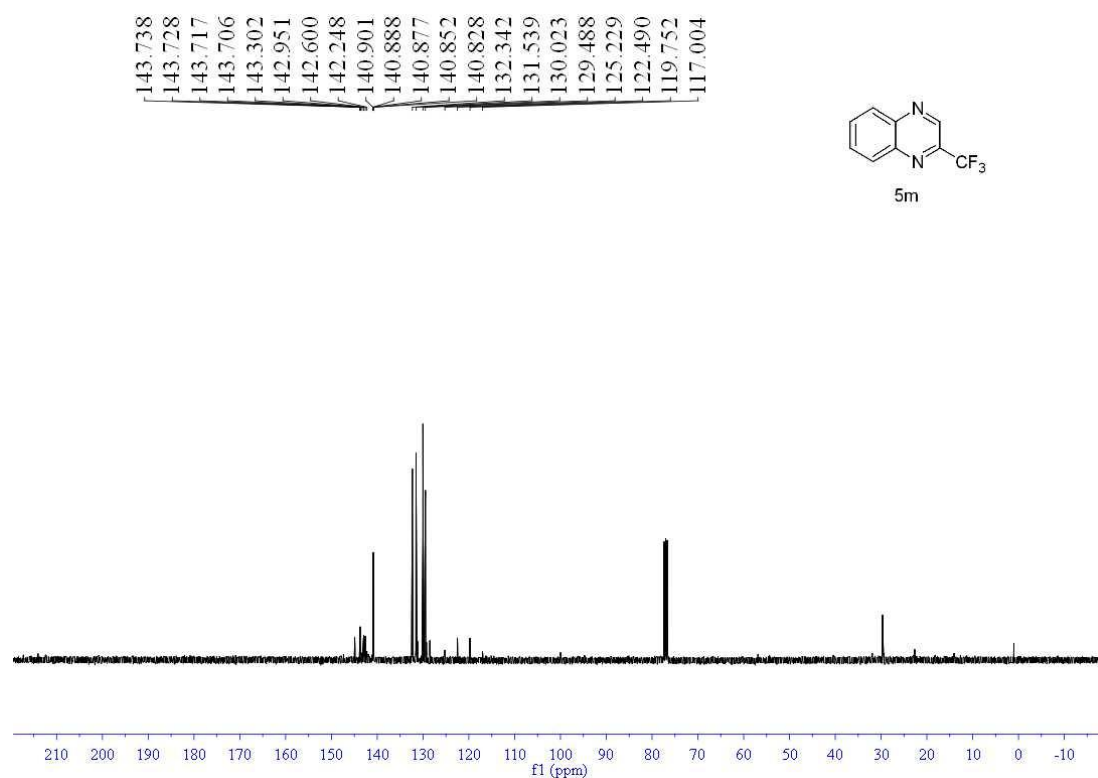

$^{19}\text{F}$  NMR spectrum of **5m** (unlocked)

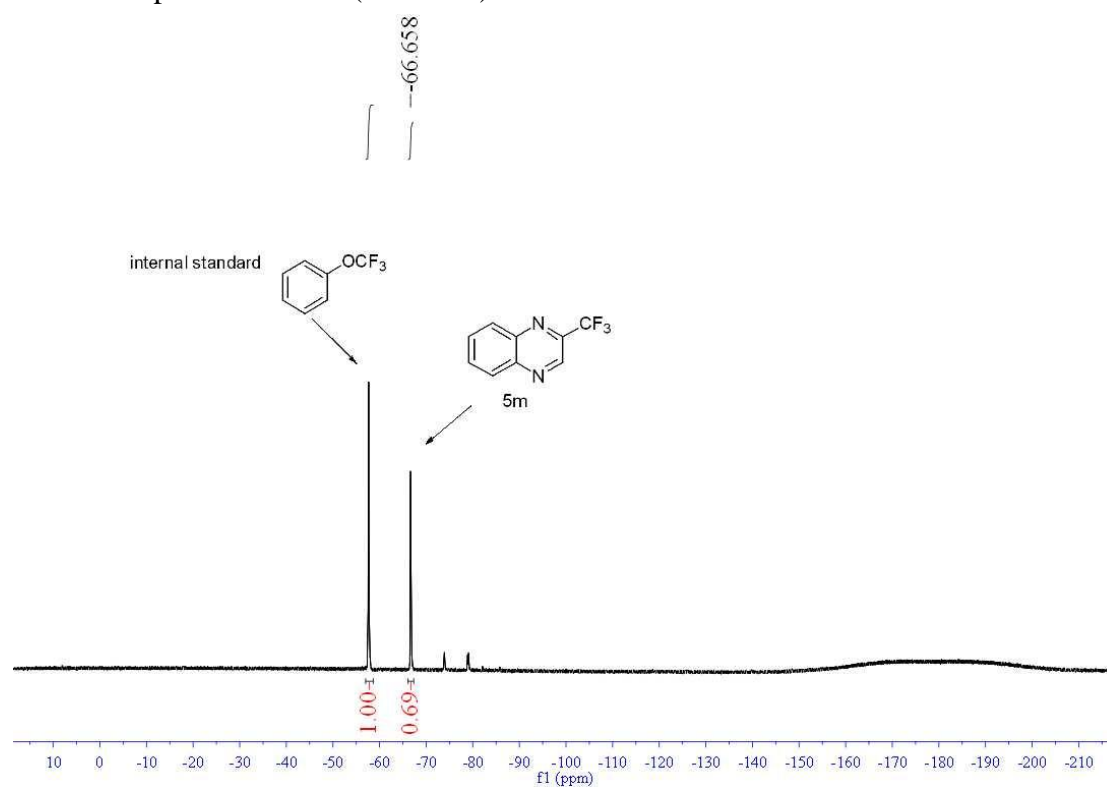

$^1\text{H}$  NMR spectrum of **5n** in  $\text{CDCl}_3$

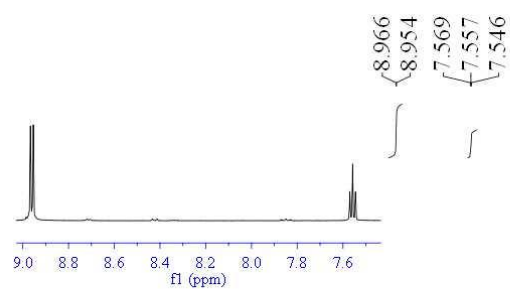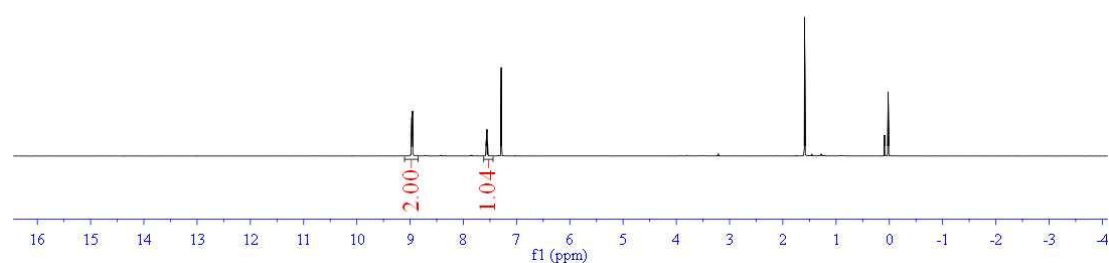

$^{19}\text{F}$  NMR spectrum of **5n** in  $\text{CDCl}_3$

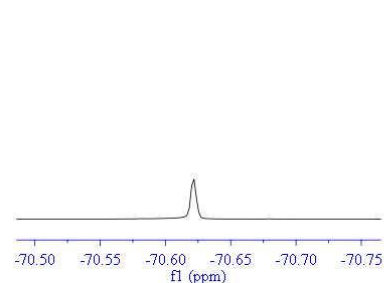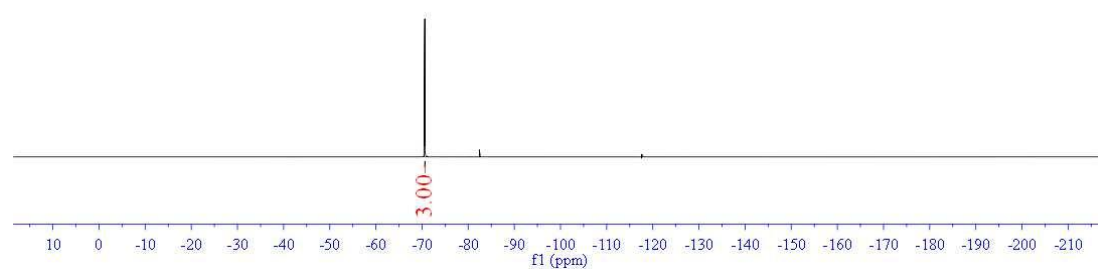

$^{13}\text{C}$  NMR spectrum of **5n** in  $\text{CDCl}_3$

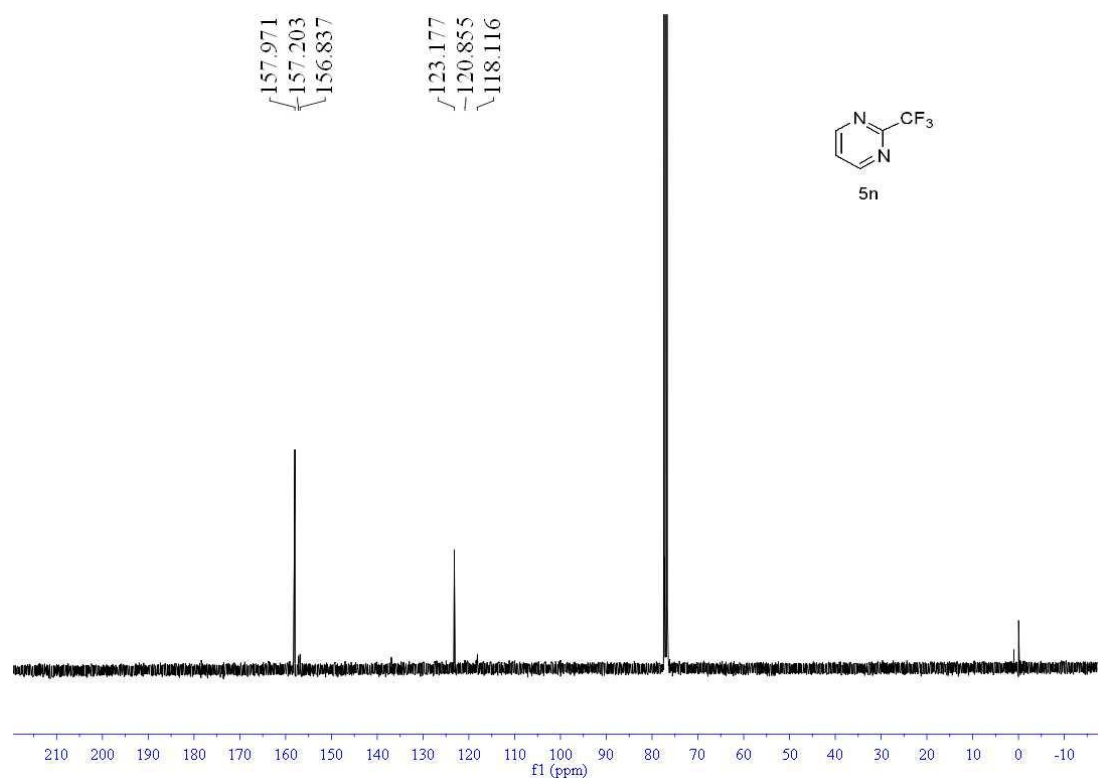

$^{19}\text{F}$  NMR spectrum of **5n** (unlocked)

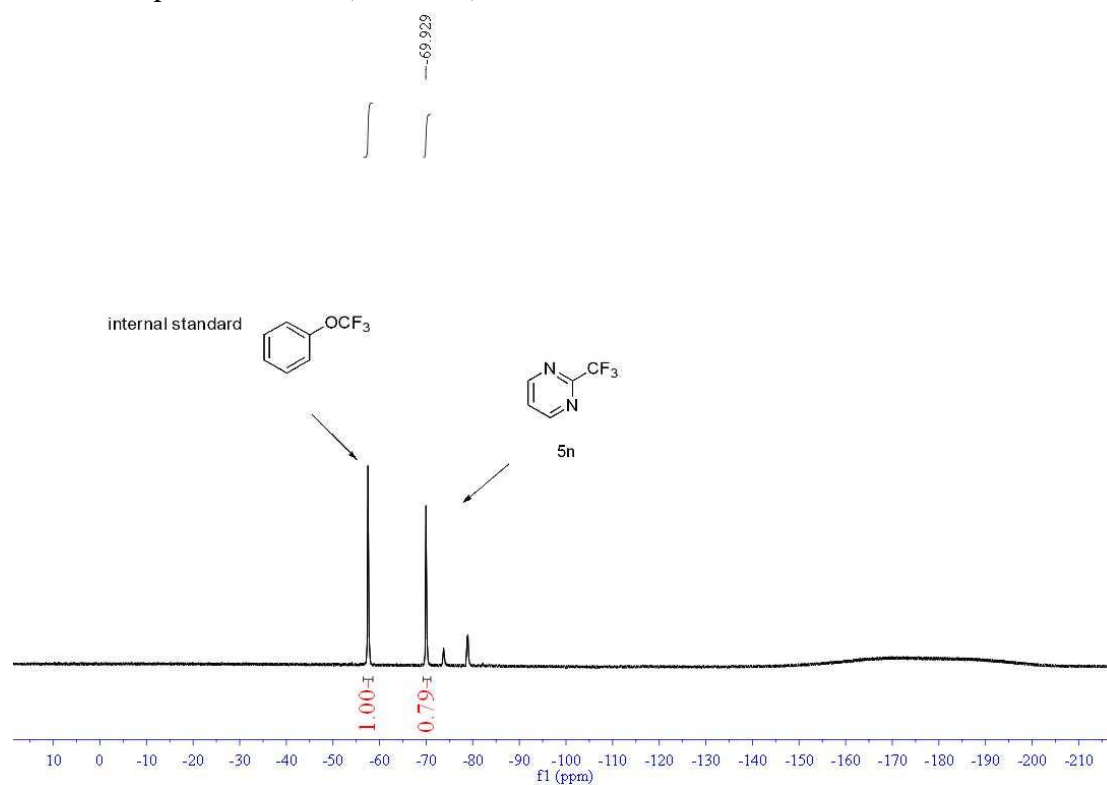

$^1\text{H}$  NMR spectrum of **5o** in  $\text{CDCl}_3$

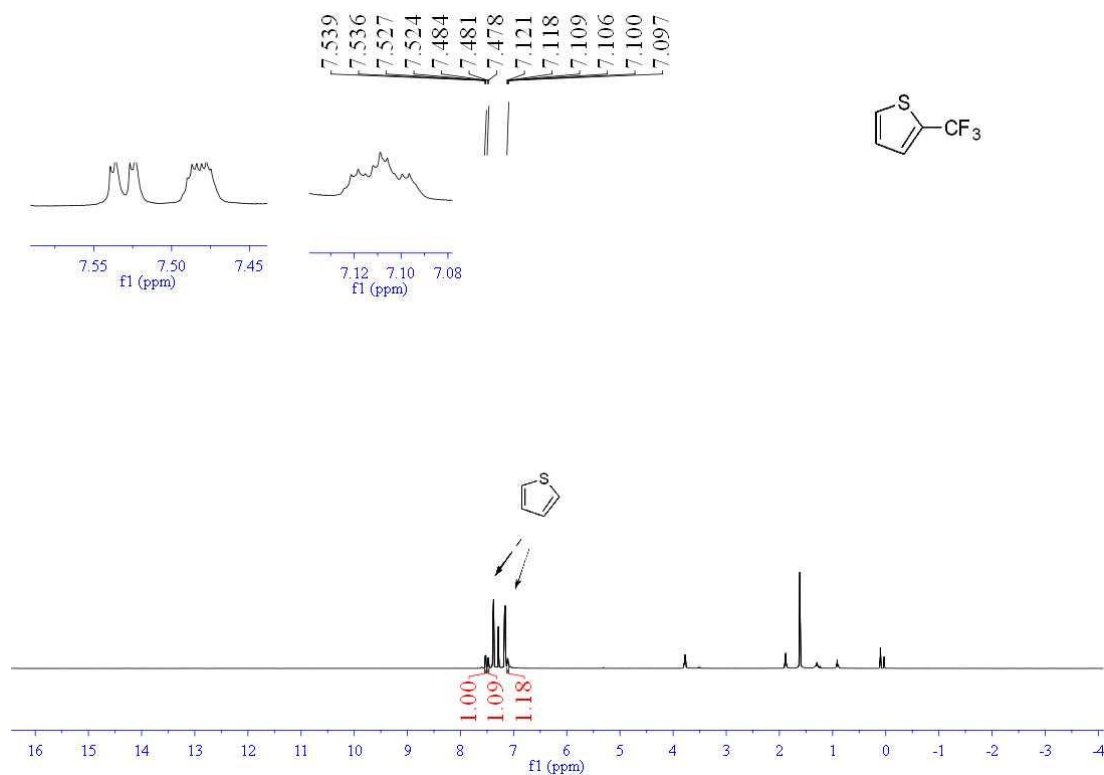

$^{19}\text{F}$  NMR spectrum of **5o** in  $\text{CDCl}_3$

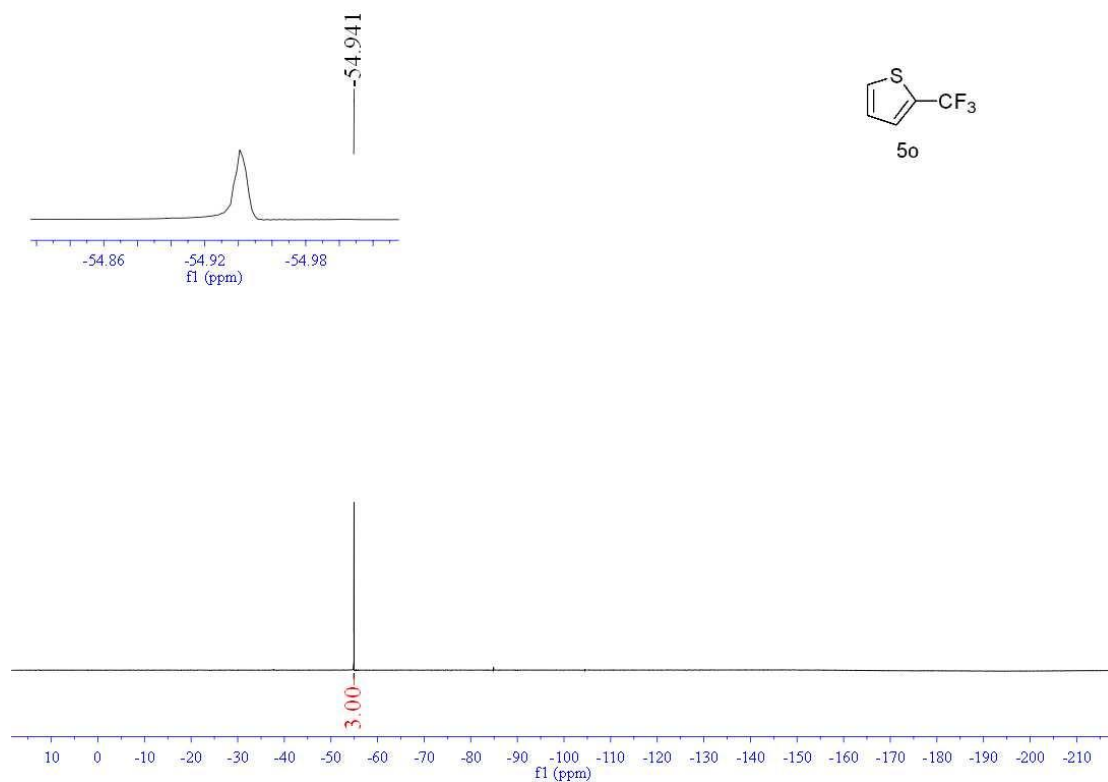

$^{13}\text{C}$  NMR spectrum of **5o** in  $\text{CDCl}_3$

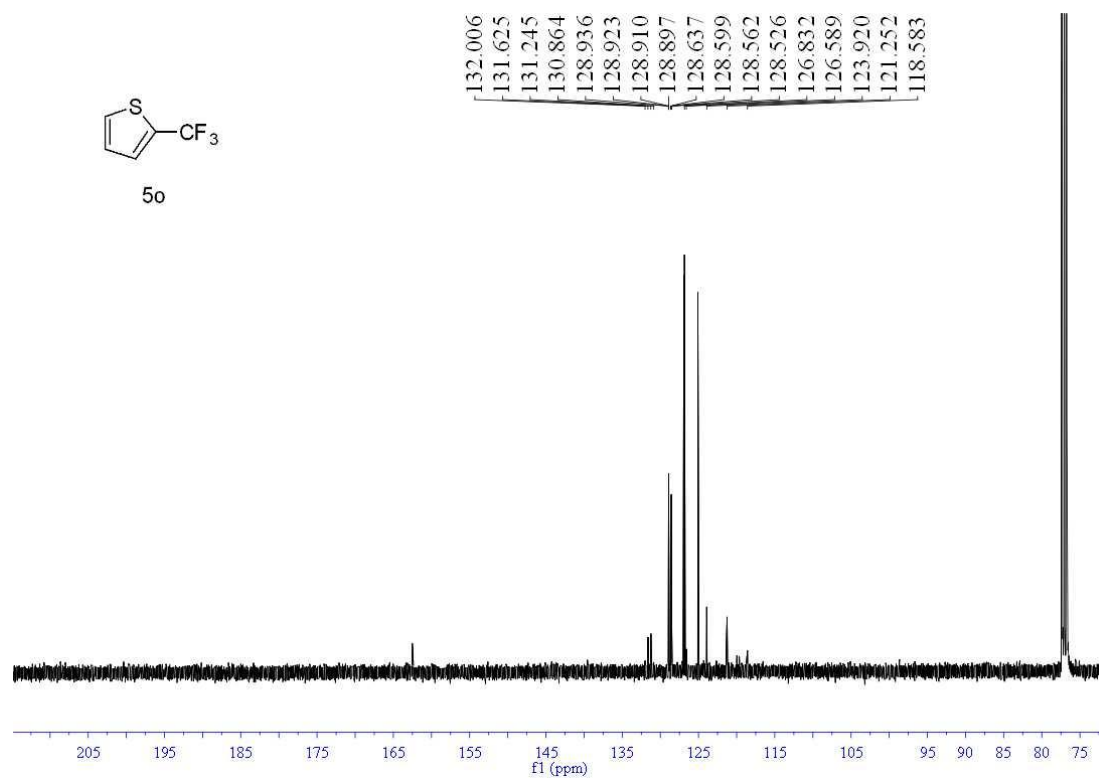

$^{19}\text{F}$  NMR spectrum of **5o** (unlocked)

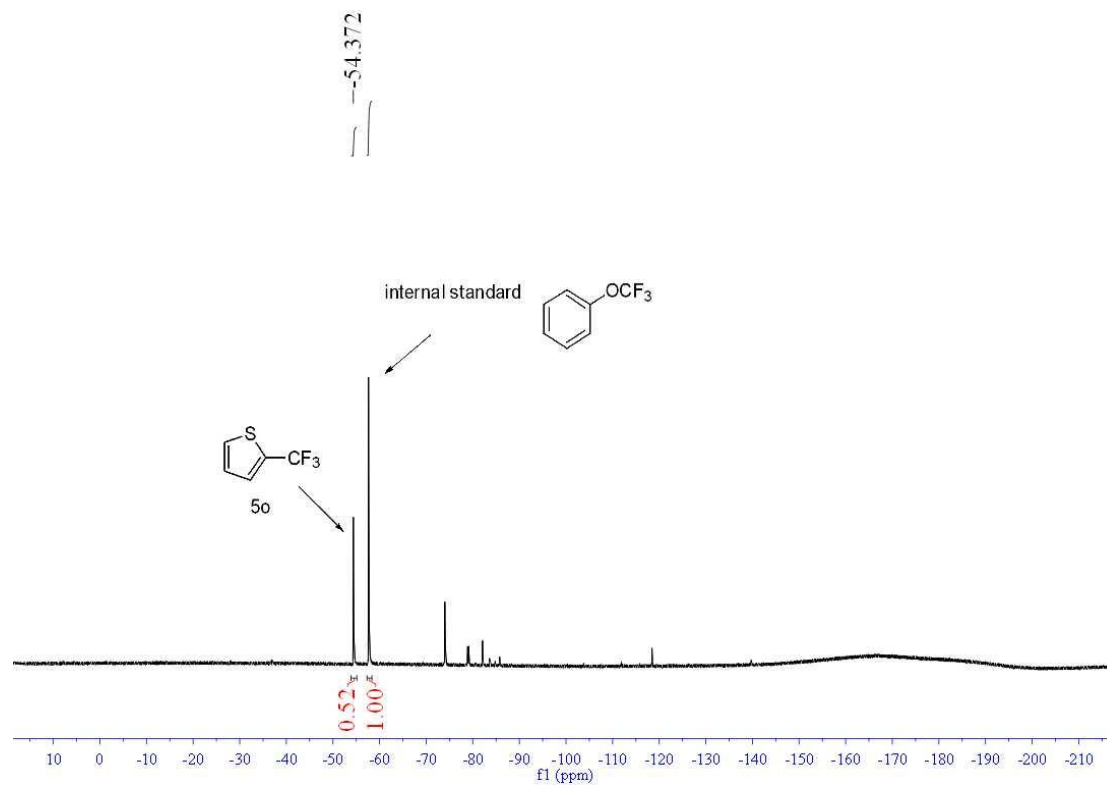

$^1\text{H}$  NMR spectrum of **7** in  $\text{CDCl}_3$

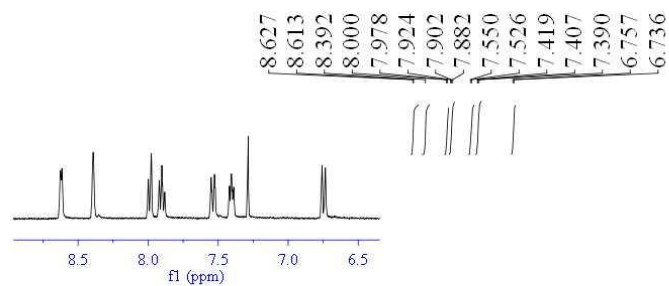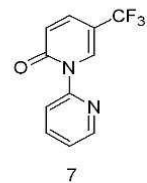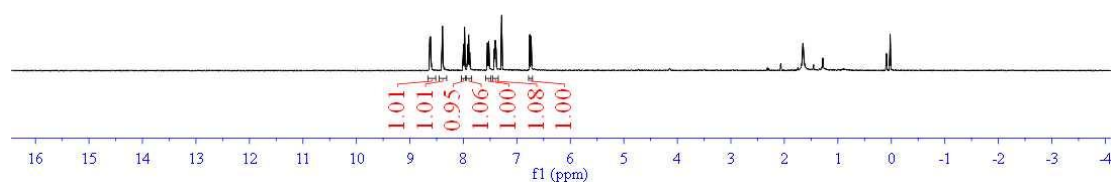

$^{19}\text{F}$  NMR spectrum of **7** in  $\text{CDCl}_3$

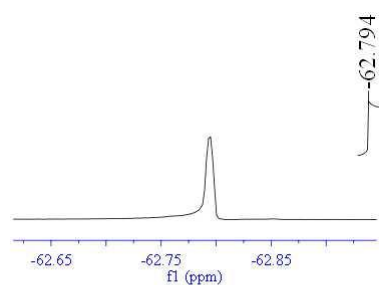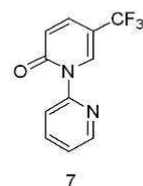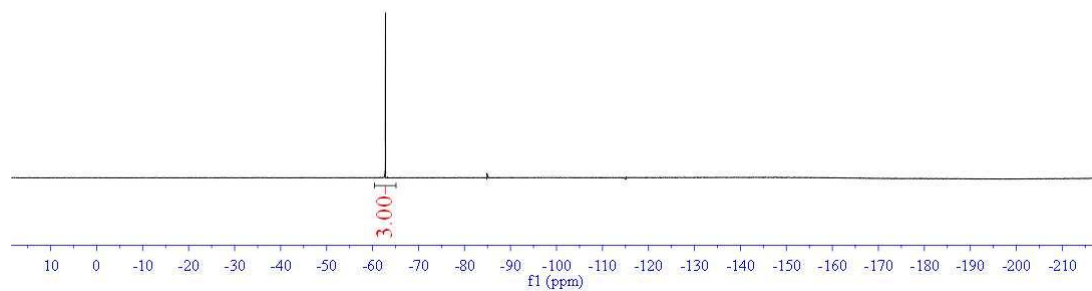

$^{13}\text{C}$  NMR spectrum of **7** in  $\text{CDCl}_3$

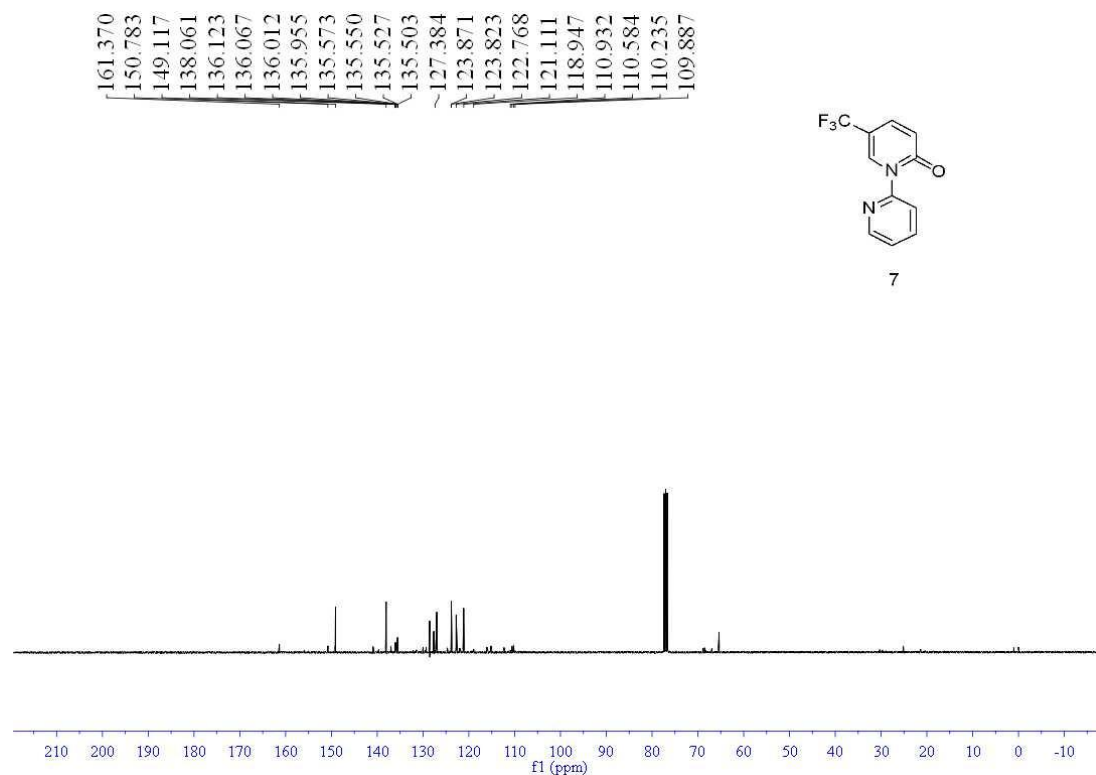

$^{19}\text{F}$  NMR spectrum of **7** (unlocked)

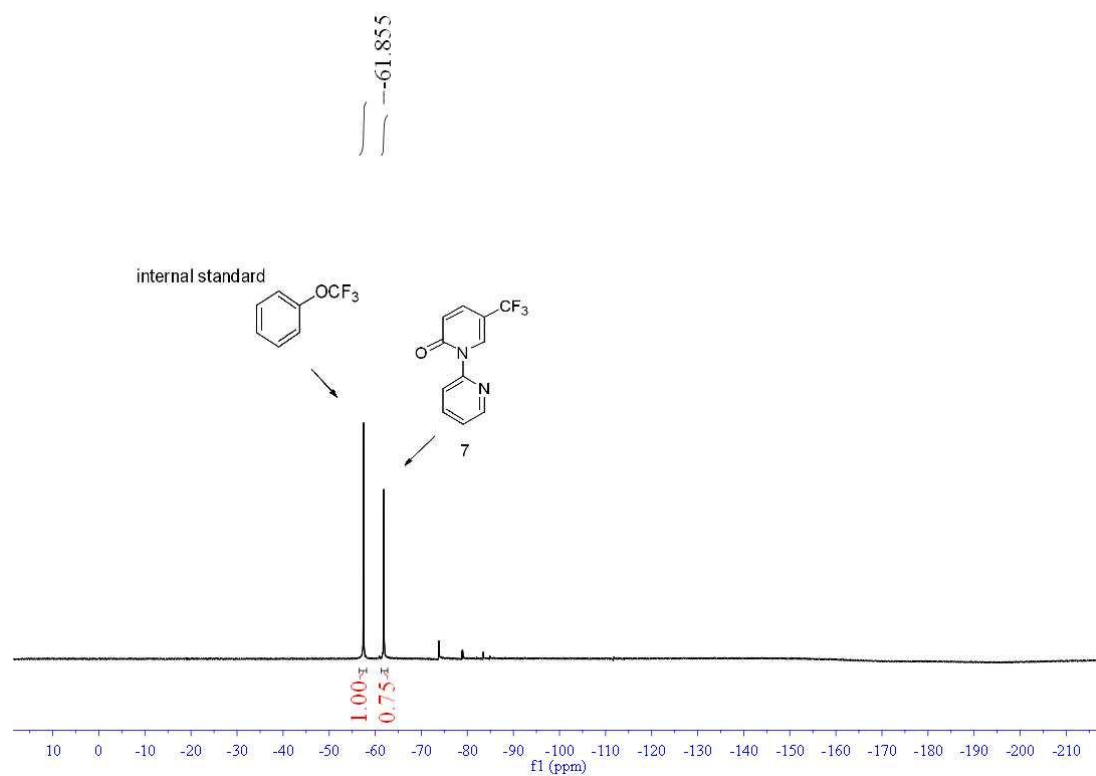

Supplement: c6ra15547b1.pdf [file c6ra15547b1.pdf]
